# Supplementary material
Source: Research Square preprint supplement (doi:10.21203/rs.3.rs-9212289/v1)
Supplement: Supplementary file 1 [file 4c632017a0c55a9a6dbb3297.docx]

线性插值法代码分享：

面板数据线性插值 xtset Stckd Year

1. by id:ipolate x1 year,gen(x11) 中间值缺失
2. by id:ipolate x1 year,gen(x12) epolate 两端值缺失
3. 时间序列数据线性插值
4. ipolate x1 year,gen(x11) 中间值缺失
5. ipolate x1 year,gen(x12) epolate两端值缺失

缩尾：

winsor2 变量， replace cuts(1 99)

destring Share, replace force

1. 描述性统计：(直接把数据导出为表格) sum2docx Rose Debt Share Fc IN Ep Size Roa Fixed Liquid Board Age Life Soe Bm Gro Lev using out.docx, replace stats(N mean sd min max) title("表1：描述性统计")
2. 基准回归：
3. xtset Code Year
4. encode 股票代码 , generate(a2)
5. encode 公司简称 , generate(a1)
6. destring Share, replace force
7. reghdfe Rose Debt Roa Fixed Liquid Board Size Life Soe Bm Gro Lev ,absorb( Code Year ) vce(cluster Code )

reghdfe Rose Share Roa Fixed Liquid Board Size Life Soe Bm Gro Lev ,absorb( Code Year ) vce(cluster Year )

est store a1

outreg2 [a1]using "baseresult.doc",replace addtext(yearfix,YES,areafix,YES)bdec(3) sdec(3)

1. 工具变量法

工具变量取均值

encode Industry, gen(industry1)

encode industry_code, gen(industry_numeric)

bysort industry_numeric: egen industry_count = count(firm_id)

bysort industry_numeric: egen industry_sum_Debt = total(Debt)

bysort industry_numeric: egen industry_sum_Share = total(Share)

gen IV_average_Debt = (industry_sum_Debt - Debt) / (industry_count - 1)

gen IV_average_Share = (industry_sum_Share - Share) / (industry_count - 1)

drop if missing(IV_average_Debt)

reghdfe Debt Debtmean Roa Fixed Liquid Board Size Life Soe Bm Gro Lev ,absorb( Code Year ) vce(robust ) keepsing

outreg2 using result.doc,replace tstat bdec(4) tdec(4) addtext(Firm FE,Yes, Year FE, Yes) ctitle(111)

ivreghdfe Rose Roa Fixed Liquid Board Size Life Soe Bm Gro Lev ( Debt = Debtmean),absorb( Code Year )vce(robust ) first keepsing

outreg2 using result.doc,append tstat bdec(4) tdec(4) addtext(Firm FE,Yes, Year FE, Yes) ctitle(222)

reghdfe Share Sharemean Roa Fixed Liquid Board Size Life Soe Bm Gro Lev ,absorb( Code Year ) vce(robust ) keepsing

outreg2 using result.doc,replace tstat bdec(4) tdec(4) addtext(Firm FE,Yes, Year FE, Yes) ctitle(111)

ivreghdfe Rose Roa Fixed Liquid Board Size Life Soe Bm Gro Lev ( Share = Sharemean ),absorb( Code Year )vce(robust ) first keepsing

outreg2 using result.doc,append tstat bdec(4) tdec(4) addtext(Firm FE,Yes, Year FE, Yes) ctitle(222)

1. Heckman检验
2. 解释变量生成0、1的虚拟变量：

sum Debt , meanonly

display r(mean)

gen Debt1 = ( Debt > r(mean)) if !missing( Debt )

tab Debt1

sum Share , meanonly

display r(mean)

gen Share1 = ( Share > r(mean)) if !missing( Share )

tab Share1

第一阶段：

一定是probit模型

probit 解释变量 工具变量 所有控制变量 时间效应 个体效应，标准误 nolog

probit Debt1 Debtmean Roa Fixed Liquid Board Size Life Soe Bm Gro Lev i.Year i.Code ,vce(cluster Code ) nolog

outreg2 using result.doc,replace tstat bdec(4) tdec(4) ctitle( Debt1 )

计算你米尔斯系数：

predict y_hat, xb

gen imr = normalden(y_hat)/normal(y_hat) if Debt1 !=.

replace imr = -normalden(y_hat)/normal(-y_hat) if Debt1 ==0

第二阶段：

reghdfe Rose Debt1 imr Roa Fixed Liquid Board Size Life Soe Bm Gro Lev ,absorb( Code i.Code#c.Year)

outreg2 using result.doc,append tstat bdec(4) tdec(4) ctitle( Rose )

probit Share1 Sharemean Roa Fixed Liquid Board Size Life Soe Bm Gro Lev i.Year i.Code ,vce(cluster Code ) nolog

outreg2 using result.doc,replace tstat bdec(4) tdec(4) ctitle( Share1 )

predict y_hat, xb

gen imr = normalden(y_hat)/normal(y_hat) if Share1 !=.

replace imr = -normalden(y_hat)/normal(-y_hat) if Share1 ==0

reghdfe Rose Share1 imr Roa Fixed Liquid Board Size Life Soe Bm Gro Lev ,absorb( Code i.Code#c.Year)

outreg2 using result.doc,append tstat bdec(4) tdec(4) ctitle( Rose )

1. 滞后一期

reghdfe Rose l.Share Roa Fixed Liquid Board Size Life Soe Bm Gro Lev ,absorb( Year Code Year#industry1 ) vce(cluster industry1 )

est store a1

outreg2 [a1]using "baseresult.doc",replace addtext(yearfix,YES,areafix,YES)bdec(3) sdec(3)

reghdfe Rose l.Debt Roa Fixed Liquid Board Size Life Soe Bm Gro Lev ,absorb( industry1 Year )vce(robust)

1. 剔除特殊年份

* 如果年份变量是数值型

drop if Year >= 2020 & Year <= 2022

reghdfe Rose Debt Roa Fixed Liquid Board Size Age Ep ,absorb( Code Year ) vce(robust )

est store a1

outreg2 [a1]using "baseresult.doc",replace addtext(yearfix,YES,areafix,YES)bdec(3) sdec(3)

1. PSM检验

sum Debt , meanonly

display r(mean)

gen Debt1 = ( Debt > r(mean)) if !missing( Debt )

tab Debt1

psmatch2 Debt1 Roa Fixed Liquid Board Size Life Soe Bm Gro Lev ,outcome( Rose ) logit ate ties common kernel

reghdfe Rose Debt1 Roa Fixed Liquid Board Size Life Soe Bm Gro Lev if _weight!=.,a( Year Code ) vce(cluster Year ) keepsing

est store a1

outreg2 [a1]using "baseresult.doc",replace addtext(yearfix,YES,areafix,YES)bdec(3) sdec(3)

1. 联合固定时间和行业

encode Industry, gen(industry1)

reghdfe Rose Debt Roa Fixed Liquid Board Size Life Soe Bm Gro Lev ,absorb( Year Code i.industry1#c.Year ) vce(robust )

est store a1

outreg2 [a1]using "baseresult.doc",replace addtext(yearfix,YES,areafix,YES)bdec(3) sdec(3)

1. 安慰剂检验

reghdfe Rose Debt Roa Fixed Liquid Board Size Life Soe Bm Gro Lev ,absorb( Year Code ) vce(cluster Code )

cap erase "simulations.dta"

permute Debt beta =_b[Debt] se =_se[Debt] df =e(df_r),reps(500) rseed(123) saving("simulations.dta"):reghdfe Rose Debt ,absorb( Code Year ) vce(cluster Year )

use "simulations.dta", clear

gen t_value = beta / se

gen p_value = 2 * ttail(df, abs(beta/se))

dpplot beta, xline(0.4040, lc(black*0.5) lp(dash)) xline(0, lc(black*0.5) lp(solid))xtitle("Estimator", size(*0.8)) ytitle("Density", size(*0.8))

1. 替换被解释变量

reghdfe BD Debt Roa Fixed Liquid Board Size Life Soe Bm Gro Lev ,absorb( Code Year ) vce(cluster Code )

reghdfe BD Share Roa Fixed Liquid Board Size Life Soe Bm Gro Lev ,absorb( Code Year ) vce(cluster Code )

est store a1

outreg2 [a1]using "baseresult.doc",replace addtext(yearfix,YES,areafix,YES)bdec(3) sdec(3)

11、中介效应检验

reghdfe Fc Share Roa Fixed Liquid Board Size Life Soe Bm Gro Lev ,absorb( Year Code ) vce(robust )

reghdfe Fc Debt Roa Fixed Liquid Board Size Life Soe Bm Gro Lev ,absorb( Year Code ) vce(robust )

reghdfe IN Debt Roa Fixed Liquid Board Size Life Soe Bm Gro Lev ,absorb( Year Code ) vce(robust )

reghdfe IN Share Roa Fixed Liquid Board Size Life Soe Bm Gro Lev ,absorb( Year Code ) vce(robust )

est store a1

outreg2 [a1]using "baseresult.doc",replace addtext(yearfix,YES,areafix,YES)bdec(3) sdec(3)

bootstrap indirect1 = (_b[Debt]*_b[Fc]), reps(500) seed(123) saving(boot_debt, replace): reg Rose Fc Debt
