# Supplementary material
Source: Research Square preprint supplement (doi:10.21203/rs.3.rs-9212289/v1)
Supplement: Supplementary file 2 [file 6fc5a71965f89689f87b4469.xlsx]

## Sheet: Sheet1
Code	Industry	Year	公司简称	Stckd	Rose	Debt	Share	Fc	IN	Roa	Fixed	Liquid	Board	Size	Life	Soe	Bm	Gro	Lev	Sharemean	Debtmean	Age	Ep	BD	Fc1	IN1
1	K70	2015	莱茵体育	000558.SZ	3.96022	0.471873	0.662385	-0.884707	4.345	-0.135269	0.09305	2.55585	2.3979	21.7638	1	0	0.124135	0.464143	0.521308	0.391796	0.289209	21	8.05571	2.37074	-4.94063	7.32559
1	K70	2016	莱茵体育	000558.SZ	3.98217	0.388593	0.246795	-0.947026	4.3385	0.027655	0.104835	2.18089	2.30259	21.6574	3	0	0.23118	2.36287	0.45875	0.396542	0.294108	22	5.50616	0.297313	-3.03129	3.82661
1	K70	2017	莱茵体育	000558.SZ	4.03949	0.390444	0.357148	-0.91548	6.0035	0.0235143	0.101779	1.25185	2.19722	21.6602	3	0	0.338225	-0.586824	0.457423	0.395304	0.293999	23	2.95662	1.05155	-3.62959	5.05302
1	K70	2018	莱茵体育	000558.SZ	4.02482	0.372808	0.195609	-0.930029	4.5225	-0.0270203	0.184353	1.07811	2.48491	21.736	2	0	0.535593	-0.786148	0.509575	0.397112	0.295037	24	1.86709	0.665586	-2.88437	3.63429
1	K70	2019	莱茵体育	000558.SZ	3.99783	0.457761	0.543108	-0.894377	5.143	0.0128233	0.112199	1.50424	2.56495	21.607	3	1	0.449228	0.83955	0.468859	0.393182	0.29004	25	2.22604	1.33823	-4.52087	6.60633
1	K70	2020	莱茵体育	000558.SZ	4.12633	0.56105	0.269452	-0.930581	4.06	-0.0431937	0.123141	1.65939	2.48491	21.4961	1	1	0.478224	0.016149	0.436977	0.396289	0.283964	26	2.09107	1.15224	-4.24293	6.18954
1	K70	2021	莱茵体育	000558.SZ	4.07957	0.591901	0.755509	-0.929128	5.783	-0.0691357	0.226841	1.7295	2.30259	21.3731	2	1	0.332457	-0.059511	0.41726	0.409017	0.382149	27	3.0079	2.44858	-6.1389	9.67416
1	K70	2022	莱茵体育	000558.SZ	4.08016	0.562538	0.715907	-0.939611	5.593	-0.026694	0.134734	1.85464	2.48491	21.3293	1	1	0.410314	2.55298	0.41232	0.409406	0.383876	28	2.43716	2.08909	-5.86316	9.18177
1	K70	2023	莱茵体育	000558.SZ	4.17498	0.591901	0.797148	-0.97981	5.8835	0.0414877	0.288855	3.04925	3.19722	21.4155	1	1	0.443785	2.94333	0.36344	0.408606	0.382149	28	2.25334	2.47954	-6.5	10.6436
2	C13	2015	西王食品	000639.SZ	3.96443	0.198094	0.249723	-1.00595	1.515	0.109203	0.101521	2.49785	2.30259	21.2786	3	0	0.257937	-0.120002	0.219564	0.344383	0.29146	19	3.87691	0.276195	-2.19651	2.40432
2	C13	2016	西王食品	000639.SZ	3.99273	0.500908	0.36674	-1.0649	1.215	0.030684	0.081633	1.94127	2.19722	22.8439	2	0	0.54224	0.759078	0.695448	0.39089	0.353608	20	1.8442	1.38638	-3.99866	5.56572
2	C13	2017	西王食品	000639.SZ	4.23846	0.426469	0.552254	-1.06458	2.735	0.0664903	0.093525	1.80391	2.56495	22.7654	3	0	0.613221	-0.045663	0.64059	0.386125	0.362913	21	1.63073	1.36947	-5.09663	8.1255
2	C13	2018	西王食品	000639.SZ	4.23846	0.302108	0.454174	-1.07182	2.27	0.07642	0.066926	1.39433	2.30259	23.0534	2	0	1.00562	0.068862	0.51104	0.388672	0.378458	22	0.99441	1.00006	-4.19366	6.53779
2	C13	2019	西王食品	000639.SZ	4.23846	0.252408	0.295672	-0.9869	1.83	-0.143999	0.081204	1.45167	2.19722	22.8201	3	0	0.911854	0.062031	0.496239	0.392656	0.384671	23	1.09667	0.604231	-3.36709	5.02088
2	C13	2020	西王食品	000639.SZ	4.12009	0.243876	0.395173	-0.979891	2.39	0.0574913	0.080141	1.59749	2.3979	22.7676	1	0	0.7058	-0.083026	0.444163	0.390174	0.385737	24	1.41683	1.1018	-3.38976	4.87685
2	C13	2021	西王食品	000639.SZ	4.23846	0.520908	0.801148	-0.982739	3.33	0.0387793	0.074334	1.62129	2.19722	22.7663	3	0	0.882614	-0.193983	0.422144	0.379355	0.451108	25	1.133	2.46483	-6.46315	10.6212
2	C13	2022	西王食品	000639.SZ	3.87425	0.444474	0.682625	-0.980473	3.285	-0.136179	0.08654	1.55005	2.30259	22.6799	1	0	0.858466	-0.157587	0.446345	0.382636	0.460663	26	1.16487	1.37356	-4.66534	6.6892
2	C13	2023	西王食品	000639.SZ	3.87425	0.44053	0.55674	-0.996161	2.685	-0.008058	0.09204	1.16069	2.2079	22.6911	3	0	0.892919	-0.042847	0.453139	0.405124	0.461156	27	1.11992	1.82496	-4.15746	5.7308
3	C37	2015	钱江摩托	000913.SZ	3.98816	0.0102758	0.366439	-0.964855	3.285	-0.0588493	0.133711	1.75387	2.83321	21.9553	1	1	0.517754	0.308793	0.407609	0.362879	0.102385	16	1.93142	0.0184916	-1.93277	2.12982
3	C37	2016	钱江摩托	000913.SZ	3.9791	0.0190189	0.461231	-1.02182	3.215	0.115822	0.11657	1.99572	2.83321	22.0023	2	0	0.409157	0.426669	0.341601	0.362472	0.102244	17	2.44405	0.0105578	-2.3141	2.82874
3	C37	2017	钱江摩托	000913.SZ	3.98515	0.0142531	0.374393	-0.957417	1.615	0.0275803	0.18835	1.83795	2.56495	22.0889	3	0	0.376054	0.397302	0.355843	0.386398	0.102321	18	2.6592	0.0807114	-1.97205	2.19535
3	C37	2018	钱江摩托	000913.SZ	4.08544	0.020247	0.615906	-0.96261	2.435	0.011692	0.191478	1.61522	2.56495	22.1972	1	0	0.727185	-0.340139	0.423726	0.385577	0.102224	19	1.37516	0.0223967	-3.21949	4.71854
3	C37	2019	钱江摩托	000913.SZ	4.05346	0.0328284	0.605689	-1.049	2.04	0.04995	0.171153	1.65205	2.19722	22.2735	1	0	0.670141	-0.14574	0.432672	0.385612	0.102021	20	1.49222	0.962155	-3.14306	4.50848
3	C37	2020	钱江摩托	000913.SZ	4.05825	0.0328284	0.743881	-0.975624	2.295	0.0563647	0.160334	1.72166	2.19722	22.2543	3	0	0.341289	-0.169403	0.419488	0.385139	0.202021	21	2.93006	0.994745	-3.69586	5.5638
3	C37	2021	钱江摩托	000913.SZ	4.05226	0.0712828	0.745649	-0.966142	4.005	0.0626873	0.130497	1.69379	2.63906	22.3553	1	0	0.599173	-0.343699	0.4106	0.385133	0.201401	22	1.66897	1.08217	-3.84689	5.802
3	C37	2022	钱江摩托	000913.SZ	4.07411	0.0852041	0.753663	-1.07342	4.3	0.086709	0.156397	1.70472	2.19722	22.6305	1	0	0.574768	-0.384303	0.478164	0.40438	0.401176	23	1.73983	1.56324	-3.99731	6.10927
3	C37	2023	钱江摩托	000913.SZ	4.09998	0.092645	0.821967	-1.06469	4.68	0.0778783	0.150938	2.18715	2.99722	22.8592	2	0	0.820945	-0.168328	0.47482	0.404187	0.401056	24	1.21811	1.3069	-4.36718	6.84544
4	C37	2015	信隆健康	002105.SZ	3.97606	0.00769733	0.592435	-0.923907	1.56	-0.0674367	0.308834	1.01483	2.3979	20.9958	2	0	0.25215	0.447271	0.62978	0.385657	0.102427	8	3.96589	0.415914	-2.7704	3.6995
4	C37	2016	信隆健康	002105.SZ	3.98444	0.0795589	0.557559	-0.916262	1.7	0.0142997	0.317178	1.04606	2.63906	21.0548	2	0	0.225595	0.172763	0.618203	0.385776	0.101267	9	4.43271	0.802694	-2.95819	3.99797
4	C37	2017	信隆健康	002105.SZ	4.1427	0.0758516	0.450158	-0.977276	4.35	0.0400663	0.325522	1.0773	2.3979	21.0976	1	0	0.442175	-0.101745	0.606626	0.386141	0.101327	10	2.26155	0.474857	-2.96471	4.27526
4	C37	2018	信隆健康	002105.SZ	4.11358	0.0738628	0.144985	-0.916341	3.72	-0.00656867	0.323461	1.00811	2.3979	21.2281	1	0	0.648681	0.179664	0.656327	0.289173	0.101359	11	1.54159	0.273212	-1.68397	1.80248
4	C37	2019	信隆健康	002105.SZ	4.06467	0.0837388	0.752254	-1.01284	3.73	0.019289	0.292919	1.10175	2.63906	21.219	2	0	0.509805	-0.080098	0.637188	0.420536	0.1012	12	1.96154	1.36299	-3.95935	6.02321
4	C37	2020	信隆健康	002105.SZ	4.06749	0.0878691	0.799051	-0.997946	4.335	0.135343	0.227584	1.2642	2.3979	21.3302	2	0	0.482543	-0.158236	0.612313	0.38495	0.101133	13	2.07235	1.4926	-4.16716	6.41753
4	C37	2021	信隆健康	002105.SZ	4.04559	0.0722077	0.711099	-1.0048	4.98	0.190576	0.281604	1.37073	2.48491	21.5485	2	0	0.454666	0.12385	0.586584	0.385251	0.501386	14	2.19942	0.62284	-3.69728	5.50658
4	C37	2022	信隆健康	002105.SZ	4.01621	0.0779097	0.713024	-0.999297	4.55	0.134924	0.307213	1.01513	2.3979	21.3736	1	0	0.55143	-0.144998	0.440379	0.385245	0.501294	15	1.81347	0.981716	-3.64674	5.35668
4	C37	2023	信隆健康	002105.SZ	4.00006	0.0752025	0.518439	-0.988163	4.365	0.01263	0.301202	1.70231	2.3979	21.2514	1	0	0.549918	0.042488	0.419825	0.405043	0.501338	16	1.81845	0.697709	-2.83082	3.78673
5	I64	2015	游族网络	002174.SZ	4.00606	0.415367	0.620769	-1.04312	2.835	0.292505	0.154273	2.33059	2.19722	21.7965	1	0	0.444964	0.27499	0.25189	0.401152	0.211312	0	2.22941	1.21344	-4.66966	6.94383
5	I64	2016	游族网络	002174.SZ	4.01216	0.195188	0.681552	-1.05416	3.415	0.198848	0.150762	1.09988	2.19722	22.2717	2	0	0.419283	0.063113	0.421656	0.401075	0.112852	9	2.38502	1.27366	-4.00308	5.909
5	I64	2017	游族网络	002174.SZ	3.99543	0.155077	0.733885	-1.05793	3.96	0.150496	0.105344	1.46532	2.56495	22.6158	2	0	0.393602	0.064382	0.38691	0.401008	0.113133	10	2.54064	1.07105	-3.99296	5.90192
5	I64	2018	游族网络	002174.SZ	3.99024	0.141156	0.565556	-0.99267	3.4	0.190781	0.097509	1.33046	2.63906	22.7156	2	0	0.459019	0.146052	0.385447	0.401222	0.21323	11	2.17856	0.469209	-3.26321	4.52446
5	I64	2019	游族网络	002174.SZ	3.98332	0.233005	0.518487	-1.05883	3.185	0.0411173	0.078301	1.15168	2.3979	22.9123	3	0	0.438796	-0.366103	0.445896	0.401281	0.212588	12	2.27896	0.74899	-3.44432	4.76522
5	I64	2020	游族网络	002174.SZ	4.0007	0.165849	0.760253	-1.02925	5.05	-0.0285927	0.083727	1.49326	2.3979	22.8742	1	0	0.618782	-0.189233	0.411173	0.400975	0.213057	13	1.61608	1.18486	-4.15563	6.20818
5	I64	2021	游族网络	002174.SZ	4.00124	0.366911	0.646192	-0.936367	9.705	0.0292453	0.095907	2.30051	2.70805	22.6609	1	0	0.4407	-0.076539	0.26091	0.40112	0.211651	14	2.26912	1.50716	-4.5528	6.76243
5	I64	2022	游族网络	002174.SZ	4.03874	0.36075	0.754247	-0.971501	4.01	-0.128737	0.10013	2.37389	2.48491	22.5604	1	0	0.614815	0.18565	0.276916	0.41765	0.211694	15	1.62651	1.44192	-5.05339	7.77895
5	I64	2023	游族网络	002174.SZ	4.05714	0.474628	0.801705	-1.0352	4.935	0.0199137	0.196764	2.32187	2.48491	22.5185	2	0	0.506504	0.339834	0.2329	0.417599	0.210898	16	1.97432	1.83831	-5.76622	9.04715
6	C23	2015	鸿博股份	002229.SZ	3.99095	0.0711716	0.432132	-0.936091	1.82	0.0127163	0.325031	1.10661	2.70805	21.438	3	0	0.274626	0.421647	0.48782	0.395187	0.0811161	7	3.64132	0.521806	-2.45168	3.05731
6	C23	2016	鸿博股份	002229.SZ	3.99189	0.0883711	0.531178	-1.00674	1.9	0.0239567	0.259847	2.7837	2.48491	21.6127	3	0	0.390439	0.29739	0.247145	0.392779	0.0789662	8	2.56122	0.0891706	-2.91283	3.91558
6	C23	2017	鸿博股份	002229.SZ	3.9899	0.0711716	0.534307	-0.966098	1.74	0.007758	0.292607	3.62374	2.19722	21.4699	3	0	0.462845	0.279182	0.164824	0.392702	0.0811161	9	2.16055	0.731608	-2.84758	3.80571
6	C23	2018	鸿博股份	002229.SZ	3.99142	0.0843711	0.417714	-0.9955	1.715	0.00895	0.288657	3.20606	2.19722	21.4495	1	0	0.563826	0.381528	0.178888	0.395533	0.0794662	10	1.7736	0.597605	-2.4519	3.04544
6	C23	2019	鸿博股份	002229.SZ	3.98953	0.0846851	0.436688	-0.936483	1.875	0.0317557	0.255163	3.98649	2.77259	21.4763	2	0	0.58213	0.307967	0.154984	0.395077	0.0794269	11	1.71783	0.286777	-2.522	3.17481
6	C23	2020	鸿博股份	002229.SZ	3.9893	0.0877711	0.581515	-0.931404	2.235	0.0243907	0.218485	3.70019	2.56495	21.4833	3	0	0.602858	0.160401	0.169687	0.391532	0.0790412	12	1.65877	0.700092	-3.0996	4.26579
6	C23	2021	鸿博股份	002229.SZ	3.99015	0.0710268	0.491161	-0.924826	2	0.0121263	0.177206	2.71695	2.19722	21.6061	1	0	0.629918	0.666712	0.262199	0.393759	0.0811342	13	1.58751	0.490541	-2.67925	3.48733
6	C23	2022	鸿博股份	002229.SZ	3.99052	0.0804188	0.607419	-0.936287	2.575	-0.0310193	0.160349	2.15368	2.19722	21.6221	2	0	0.608811	0.212315	0.299303	0.438004	0.0999602	14	1.64254	0.695136	-3.17337	4.41487
6	C23	2023	鸿博股份	002229.SZ	4.02186	0.0811131	0.562613	-0.966359	2.215	-0.0124117	0.18864	1.44997	1.94591	21.8486	2	0	0.203421	-0.059878	0.460747	0.410101	0.0998734	15	4.91591	0.88914	-3.08876	4.3056
7	C27	2015	永安药业	002365.SZ	4.00831	0.0203724	0.698519	-0.979132	2.1	0.01914	0.488352	8.73985	2.07944	20.9081	1	0	0.333539	0.19397	0.069407	0.419721	0.150298	5	2.99815	1.03887	-3.32744	4.79562
7	C27	2016	永安药业	002365.SZ	3.99024	0.0127805	0.709505	-0.969778	1.985	0.0662927	0.433125	8.18334	1.79176	20.9649	2	0	0.306041	-0.114352	0.075564	0.419515	0.151247	6	3.26753	0.820438	-3.28818	4.69893
7	C27	2017	永安药业	002365.SZ	4.10142	0.00988101	0.446479	-0.992493	1.57	0.121247	0.321219	3.37967	1.79176	21.1806	2	0	0.280769	0.327508	0.148888	0.42435	0.15161	7	3.56164	0.373606	-2.55935	3.50441
7	C27	2018	永安药业	002365.SZ	4.15637	0.016737	0.784318	-1.00238	1.215	0.132883	0.512601	2.79132	1.94591	21.3803	3	0	0.619011	0.254877	0.167499	0.418095	0.150753	8	1.61548	0.62947	-4.05998	6.43165
7	C27	2019	永安药业	002365.SZ	4.11798	0.0126683	0.619821	-1.01934	2.985	0.0744057	0.52316	3.64134	1.79176	21.3692	2	0	0.651227	-0.013036	0.131633	0.42119	0.151261	9	1.53556	0.455785	-3.2938	4.92058
7	C27	2020	永安药业	002365.SZ	4.01527	0.282346	0.676573	-1.00206	2.99	0.076566	0.455694	3.31212	1.79176	21.4951	2	0	0.733955	-0.09237	0.161723	0.420133	0.117552	10	1.36248	1.35047	-4.35684	6.49808
7	C27	2021	永安药业	002365.SZ	4.02424	0.382517	0.607419	-0.930946	2.695	0.070867	0.41392	3.6333	2.19722	21.55	1	0	0.702186	0.064896	0.143901	0.421419	0.10503	11	1.42412	1.41703	-4.53084	6.74334
7	C27	2022	永安药业	002365.SZ	4.11292	0.200911	0.719791	-1.01089	3.385	0.0746057	0.40092	4.19232	1.79176	21.6088	3	0	0.746871	0.145538	0.132487	0.433382	0.527731	12	1.33892	1.19628	-4.45722	6.93016
7	C27	2023	永安药业	002365.SZ	4.11404	0.284546	0.756155	-1.00853	3.135	-0.0159463	0.39522	4.71747	1.79176	21.5765	1	0	0.772572	-0.242041	0.127324	0.432784	0.517277	13	1.29438	1.24162	-4.95208	7.78678
8	C18	2015	嘉麟杰	002486.SZ	3.98524	0.0595968	0.437706	-0.914232	1.85	-0.0907043	0.483504	2.01296	2.30259	21.1985	3	0	0.28023	-0.178158	0.421157	0.400074	0.14947	5	3.56849	0.244297	-2.40908	2.97863
8	C18	2016	嘉麟杰	002486.SZ	3.97789	0.0575225	0.2942	-0.919289	1.595	0.00171	0.491226	1.86728	2.83321	21.2131	2	0	0.182155	-0.264312	0.425946	0.400568	0.14951	6	5.48983	0.121828	-1.81975	1.85192
8	C18	2017	嘉麟杰	002486.SZ	4.12883	0.0463348	0.451157	-0.910369	1.64	0.0155317	0.224865	3.27487	2.83321	21.1146	3	0	0.297159	0.044295	0.352762	0.400027	0.149721	7	3.3652	0.230986	-2.80649	3.98181
8	C18	2018	嘉麟杰	002486.SZ	4.09207	0.0502276	0.58608	-0.901644	2.655	0.019186	0.281534	3.64139	2.63906	20.8179	3	0	0.329349	0.117223	0.144996	0.39956	0.149647	8	3.0363	0.680729	-3.24696	4.75186
8	C18	2019	嘉麟杰	002486.SZ	4.04368	0.0563816	0.435896	-0.896213	2.05	-0.0203123	0.26289	3.5194	2.63906	20.8094	1	0	0.376356	-0.015939	0.160872	0.40008	0.149531	9	2.65706	0.424728	-2.55153	3.34822
8	C18	2020	嘉麟杰	002486.SZ	4.10846	0.0641324	0.424641	-0.917475	1.665	0.0208223	0.219737	2.86629	2.63906	20.9278	1	0	0.408797	0.01581	0.249261	0.400119	0.149385	10	2.4462	0.0937746	-2.72061	3.76784
8	C18	2021	嘉麟杰	002486.SZ	4.0556	0.0683051	0.634307	-0.891338	2.87	0.022708	0.223559	3.24306	2.48491	20.8957	1	0	0.433028	-0.00163	0.215686	0.430767	0.249306	11	2.30932	0.301705	-3.40912	4.98098
8	C18	2022	嘉麟杰	002486.SZ	4.02285	0.061742	0.58754	-0.985575	2.07	0.100688	0.209863	3.52672	2.30259	20.9565	2	0	0.413916	-0.168239	0.202028	0.416443	0.24943	12	2.41595	0.769332	-3.10781	4.36252
8	C18	2023	嘉麟杰	002486.SZ	4.02309	0.0696075	0.530883	-0.914309	2.3	0.056006	0.213525	4.39946	2.48491	20.9294	3	0	0.46866	-0.033089	0.156807	0.416609	0.249282	13	2.13374	0.658343	-2.92019	3.99963
9	C21	2015	浙江永强	002489.SZ	3.97854	0.0211776	0.564613	-1.05042	1.415	0.116338	0.180804	1.53612	2.3979	22.4829	1	0	0.250926	2.94333	0.417818	0.417759	0.0304238	5	3.98525	0.437113	-2.72511	3.60443
9	C21	2016	浙江永强	002489.SZ	3.99516	0.0377812	0.554961	-1.04096	1.265	0.00923	0.158776	1.37151	2.30259	22.5993	1	0	0.366616	2.06101	0.482801	0.417944	0.0483483	6	2.72765	0.556996	-2.80321	3.76338
9	C21	2017	浙江永强	002489.SZ	4.11063	0.0443216	0.682744	-1.03689	0.92	0.0121093	0.142788	1.42687	2.19722	22.8554	2	0	0.500873	2.77059	0.605005	0.430044	0.0375308	7	1.99652	0.801223	-3.65133	5.55452
9	C21	2018	浙江永强	002489.SZ	4.11419	0.0532783	0.754842	-1.04215	1.185	-0.0157037	0.140341	1.17309	2.19722	22.6371	2	0	0.758327	2.94333	0.521737	0.44168	0.0364112	8	1.31869	0.957337	-3.98013	6.17452
9	C21	2019	浙江永强	002489.SZ	4.04539	0.0367841	0.486857	-1.06115	1.93	0.0973073	0.125549	1.31524	2.48491	22.6473	3	0	0.598386	2.94333	0.446583	0.402857	0.038473	9	1.67116	0.19776	-2.67325	3.60106
9	C21	2020	浙江永强	002489.SZ	3.99647	0.0366244	0.754901	-1.05925	1.935	0.0981013	0.107902	1.46497	2.19722	22.7117	2	0	0.649055	2.94333	0.469506	0.414043	0.0384929	10	1.5407	0.856715	-3.58247	5.24321
9	C21	2021	浙江永强	002489.SZ	4.04147	0.0335847	0.748249	-1.06052	1.365	0.0189273	0.084684	1.2217	2.19722	22.9706	1	0	0.723659	2.51467	0.620725	0.414176	0.0388729	11	1.38187	0.901796	-3.66928	5.48499
9	C21	2022	浙江永强	002489.SZ	4.07884	0.0441571	0.708529	-1.05576	1.44	0.0245643	0.093065	1.2733	2.19722	22.8453	2	0	0.686874	2.94333	0.57327	0.414962	0.0575514	12	1.45587	1.2129	-3.66265	5.52366
9	C21	2023	浙江永强	002489.SZ	4.00381	0.0368588	0.525607	-1.05673	1.31	0.00642467	0.1089	1.43925	2.19722	22.6716	2	0	0.734461	2.94333	0.47864	0.418504	0.0584636	13	1.36154	0.687323	-2.70889	3.59987
10	I64	2015	恺英网络	002517.SZ	3.98275	0.268905	0.701217	-1.17145	3.32	0.36285	0.005442	6.79273	2.48491	21.027	2	0	0.466592	-0.143139	0.161709	0.40105	0.212337	5	2.1432	1.25533	-4.30615	6.36166
10	I64	2016	恺英网络	002517.SZ	3.99299	0.155276	0.632046	-1.03294	3.17	0.305162	0.004443	4.89636	2.48491	22.1242	1	0	0.359264	0.081759	0.165426	0.401137	0.213131	6	2.78347	1.36699	-3.58948	5.13321
10	I64	2017	恺英网络	002517.SZ	4.10565	0.432776	0.745809	-1.05198	3.685	0.36285	0.003444	2.99998	1.94591	22.5323	2	0	0.79344	0.306657	0.169143	0.400993	0.211191	7	1.26033	2.24717	-5.50824	8.67989
10	I64	2018	恺英网络	002517.SZ	4.04788	0.159748	0.772282	-0.98251	3.54	0.0742873	0.004017	2.70952	2.70805	22.5332	2	0	0.661246	-0.127525	0.156154	0.40096	0.2131	8	1.5123	1.53696	-4.30861	6.58197
10	I64	2019	恺英网络	002517.SZ	4.03377	0.0519119	0.466972	-0.963814	4.15	-0.528818	0.005951	3.02321	2.83321	22.07	1	0	0.408706	0.178286	0.2448	0.401346	0.213854	9	2.44675	0.181902	-2.62651	3.47834
10	I64	2020	恺英网络	002517.SZ	4.04623	0.0539155	0.481254	-0.960907	3.655	0.088463	0.004393	4.01287	2.30259	21.9887	1	0	0.396862	0.36414	0.151225	0.401328	0.21384	10	2.51977	0.10833	-2.72536	3.68423
10	I64	2021	恺英网络	002517.SZ	4.11079	0.30658	0.603684	-0.954347	3.14	0.27657	0.003586	4.69172	2.3979	22.2048	3	0	0.405048	0.094956	0.147867	0.401173	0.212073	11	2.46884	1.12817	-4.43999	6.78931
10	I64	2022	恺英网络	002517.SZ	4.08997	0.282263	0.668201	-1.02421	3.86	0.346096	0.003655	3.28651	2.19722	22.4771	3	0	0.283708	0.103642	0.213652	0.401092	0.212243	12	3.52475	1.64234	-4.53208	6.95351
10	I64	2023	恺英网络	002517.SZ	3.97958	0.0236855	0.771432	-1.08022	3.13	0.334882	0.002641	3.37109	2.30259	22.6119	1	0	0.162368	0.202132	0.207539	0.400961	0.0140514	13	4.58066	0.982538	-3.54581	5.15867
11	I64	2015	三七互娱	002555.SZ	4.04699	0.0182116	0.444082	-1.2367	2.895	0.295784	0.053104	0.407657	2.19722	22.2544	2	0	0.394457	0.305992	0.314425	0.401375	0.21409	4	2.53513	0.19157	-2.43305	3.16699
11	I64	2016	三七互娱	002555.SZ	4.02973	0.0143371	0.357357	-1.05513	1.525	0.284526	0.042512	1.50872	2.3979	22.5774	3	0	0.42054	0.275548	0.259475	0.401485	0.214117	5	2.37789	0.00169746	-2.03022	2.37908
11	I64	2017	三七互娱	002555.SZ	4.0846	0.018038	0.498867	-1.07714	2.045	0.30309	0.03192	2.60977	2.19722	22.9381	1	0	0.314956	0.245104	0.204525	0.401306	0.214091	6	3.17504	0.454307	-2.75105	3.83178
11	I64	2018	三七互娱	002555.SZ	4.08444	0.0182116	0.472866	-1.08329	2.535	0.176888	0.004342	2.0992	2.19722	22.851	3	0	0.511853	-0.06023	0.271811	0.401339	0.21409	7	1.95368	0.402022	-2.64984	3.63957
11	I64	2019	三七互娱	002555.SZ	4.09557	0.0476778	0.51353	-1.11891	3.08	0.34011	0.004643	2.44392	2.56495	23.0403	1	0	0.246987	0.051113	0.281072	0.401287	0.413884	8	4.04879	0.968305	-2.96285	4.22185
11	I64	2020	三七互娱	002555.SZ	4.10654	0.0488148	0.595146	-1.10516	3.365	0.36285	0.087345	1.28937	2.19722	23.0807	3	0	0.21394	-0.057768	0.425856	0.401184	0.413876	9	4.67421	0.215572	-3.31677	4.90942
11	I64	2021	三七互娱	002555.SZ	4.15808	0.0466603	0.69706	-1.06686	3.855	0.293786	0.061785	2.70254	2.07944	23.3931	3	0	0.29887	-0.101905	0.24796	0.401055	0.413891	10	3.34594	1.06726	-3.84927	6.00559
11	I64	2022	三七互娱	002555.SZ	4.05516	0.0310451	0.402531	-1.10968	2.755	0.241297	0.049725	2.43848	2.3979	23.562	3	0	0.454422	0.318506	0.279777	0.403217	0.414	11	2.2006	0.299253	-2.34732	3.00533
11	I64	2023	三七互娱	002555.SZ	4.04528	0.0390249	0.464822	-1.11308	3.155	0.191258	0.043038	1.88343	2.19722	23.6748	1	0	0.47737	0.051728	0.330407	0.40314	0.413944	12	2.09481	0.340595	-2.59631	3.45288
12	I65	2015	世纪华通	002602.SZ	3.99105	0.11601	0.210232	-1.01713	1.7	0.115456	0.202704	1.96759	2.19722	22.3468	1	0	0.229015	-0.112436	0.21249	0.396336	0.290864	4	4.36653	0.534502	-1.77328	1.72766
12	I65	2016	世纪华通	002602.SZ	4.0043	0.154323	0.222235	-1.049	2.36	0.126646	0.198144	1.90801	2.19722	22.4287	1	0	0.180186	0.083757	0.200676	0.396293	0.290141	5	5.54981	0.257141	-2.01731	2.17397
12	I65	2017	世纪华通	002602.SZ	4.07821	0.600633	0.466972	-0.972344	2.075	0.17246	0.184401	1.78599	2.30259	22.5817	1	0	0.21687	0.243395	0.20528	0.395411	0.28172	6	4.61106	1.55263	-5.04532	7.59121
12	I65	2018	世纪华通	002602.SZ	4.11624	0.753304	0.476036	-1.13018	1.365	0.102177	0.068831	3.38092	2.30259	23.5414	3	0	0.471416	-0.187355	0.17088	0.395379	0.27884	7	2.12127	2.2608	-5.82525	8.98051
12	I65	2019	世纪华通	002602.SZ	4.14625	0.834232	0.652615	-1.09099	4.53	0.131309	0.037944	1.39596	2.19722	24.2002	3	0	0.632426	-0.061213	0.231476	0.394737	0.477313	8	1.58121	2.87755	-6.5	11.0557
12	I65	2020	世纪华通	002602.SZ	4.13797	0.715107	0.721212	-1.07937	6.495	0.102338	0.028467	1.31337	2.19722	24.3435	1	0	0.753634	-0.196827	0.299412	0.427207	0.479561	9	1.3269	2.61238	-6.5	10.6797
12	I65	2021	世纪华通	002602.SZ	4.08968	0.611053	0.56911	-1.02231	7.06	0.0815657	0.036359	1.24144	2.63906	24.3435	1	0	0.6568	-0.095912	0.208863	0.395041	0.581524	10	1.52253	2.3079	-5.51959	8.49844
12	I65	2022	世纪华通	002602.SZ	4.04812	0.364688	0.45261	-1.05293	5.17	-0.262472	0.03738	1.60759	2.19722	24.2292	1	0	0.930349	-0.132962	0.239048	0.374186	0.586172	11	1.07486	1.02308	-3.91858	5.64037
12	I65	2023	世纪华通	002602.SZ	4.1306	0.725917	0.656467	-1.07529	5.92	0.0218857	0.044925	1.35509	2.70805	24.3435	1	0	0.764412	-0.064378	0.304127	0.427377	0.679357	12	1.3082	2.02361	-6.45507	10.2247
13	I64	2015	完美世界	002624.SZ	3.9738	0.34157	0.390833	-1.00722	13.67	0.160798	0.035683	3.34372	2.63906	21.8321	3	0	0.731866	1.42352	0.492497	0.401442	0.211828	0	1.35577	0.843848	-3.37353	4.50782
13	I64	2016	完美世界	002624.SZ	4.01394	0.259188	0.476695	-1.2367	10.97	0.136934	0.03227	2.65417	2.30259	23.5143	1	0	0.690193	0.832958	0.481347	0.401334	0.212405	5	1.44887	1.10852	-3.47606	4.84997
13	I64	2017	完美世界	002624.SZ	4.16749	0.641176	0.227723	-1.09341	13.27	0.118138	0.028857	1.96463	1.60944	23.5318	3	0	0.64852	0.242392	0.470197	0.401648	0.209733	6	1.54197	1.17076	-4.5299	6.72185
13	I64	2018	完美世界	002624.SZ	4.14445	0.619148	0.593492	-1.08163	16.795	0.144764	0.022677	2.74993	1.60944	23.4945	1	0	0.61214	0.365331	0.417403	0.401186	0.209887	7	1.63361	1.94251	-5.80133	9.11466
13	I64	2019	完美世界	002624.SZ	4.04844	0.434799	0.275179	-1.09711	16.185	0.11777	0.02189	2.11103	1.60944	23.5344	1	0	0.282999	0.032936	0.390913	0.401588	0.211176	8	3.53358	0.70471	-3.52009	4.81639
13	I64	2020	完美世界	002624.SZ	3.97713	0.305398	0.384806	-1.12488	8.72	0.125955	0.022831	1.87563	2.07944	23.4646	1	0	0.267391	-0.258947	0.278878	0.40145	0.412081	9	3.73985	1.16069	-3.20799	4.23549
13	I64	2021	完美世界	002624.SZ	3.98008	0.318943	0.623538	-1.04421	14.07	0.0143687	0.022332	1.73622	2.07944	23.5588	2	0	0.385015	-0.297842	0.383526	0.41779	0.411987	10	2.5973	2.07257	-4.20476	6.11558
13	I64	2022	完美世界	002624.SZ	4.03695	0.313676	0.505444	-1.08747	14.415	0.115503	0.021722	1.54924	1.60944	23.4728	2	0	0.522002	0.095531	0.39395	0.401298	0.412023	11	1.9157	1.1119	-3.88033	5.59998
13	I64	2023	完美世界	002624.SZ	4.07224	0.592471	0.66711	-1.0891	16.61	0.0520827	0.022162	1.96569	1.60944	23.3966	1	0	0.531753	-0.080948	0.349501	0.417743	0.510074	12	1.88057	2.55369	-5.77579	8.97349
14	C14	2015	金达威	002626.SZ	4.01596	0.234522	0.278698	-1.02803	0.91	0.0638803	0.204321	1.34692	2.19722	21.7433	2	0	0.223447	0.298983	0.444351	0.391189	0.315235	4	4.47533	0.882742	-2.60566	3.22856
14	C14	2016	金达威	002626.SZ	4.02274	0.413672	0.273395	-1.03441	1.335	0.134422	0.1719	3.16306	2.48491	21.8549	3	0	0.342118	0.184025	0.296992	0.39122	0.310116	5	2.92297	0.397976	-3.35312	4.47854
14	C14	2017	金达威	002626.SZ	4.13923	0.402945	0.472148	-1.02555	1.125	0.191376	0.149419	3.90107	2.48491	21.9246	1	0	0.273981	0.531523	0.250737	0.390078	0.310422	6	3.64989	1.32335	-4.40887	6.68185
14	C14	2018	金达威	002626.SZ	4.18162	0.468997	0.402387	-1.05505	1.2	0.223324	0.101007	2.4017	2.30259	22.2465	3	0	0.517719	0.060595	0.341471	0.39048	0.308535	7	1.93155	1.21878	-4.53101	6.91783
14	C14	2019	金达威	002626.SZ	4.08635	0.445255	0.662116	-1.04187	1.03	0.129958	0.110666	2.34362	2.30259	22.2705	2	0	0.341368	0.205734	0.371134	0.388974	0.309214	8	2.92939	2.09923	-5.17994	8.01362
14	C14	2020	金达威	002626.SZ	4.01739	0.243775	0.65732	-1.03662	1.05	0.255229	0.11421	1.94093	2.19722	22.3628	3	0	0.223726	-0.025663	0.322235	0.407604	0.31497	9	4.46976	1.35661	-4.12627	6.10291
14	C14	2021	金达威	002626.SZ	4.18059	0.492892	0.670087	-1.04399	0.645	0.186719	0.203432	3.24648	2.30259	22.4893	2	0	0.276715	-0.017328	0.311364	0.388927	0.407853	10	3.61383	2.068	-5.67302	9.05627
14	C14	2022	金达威	002626.SZ	4.09505	0.47569	0.52478	-1.03743	1.195	0.0588637	0.208659	2.07014	2.63906	22.4019	2	0	0.373785	-0.048807	0.316969	0.408245	0.408344	11	2.67533	1.41097	-4.79538	7.2692
14	C14	2023	金达威	002626.SZ	4.12281	0.461717	0.512066	-1.05324	1.075	0.0686603	0.217209	3.07933	2.19722	22.401	1	0	0.470576	0.016782	0.264674	0.408306	0.408743	12	2.12505	1.51649	-4.76472	7.27077
15	C29	2015	国恩股份	002768.SZ	3.97049	0.0893957	0.464817	-0.966342	0.585	0.109647	0.122081	2.69137	2.30259	20.721	3	0	0.47552	0.713461	0.283642	0.410381	0.230297	0	2.10296	0.90935	-2.59842	3.28352
15	C29	2016	国恩股份	002768.SZ	3.99448	0.0780684	0.598737	-0.998615	0.61	0.125909	0.174044	1.52392	2.30259	21.2175	3	0	0.470856	0.333152	0.463371	0.409527	0.230732	1	2.12379	0.814592	-3.14069	4.36181
15	C29	2017	国恩股份	002768.SZ	4.2143	0.251297	0.709669	-0.993534	1.59	0.139479	0.275339	1.31768	2.56495	21.5045	1	0	0.511078	0.185091	0.510548	0.408814	0.22407	2	1.95665	1.65016	-4.91111	7.90762
15	C29	2018	国恩股份	002768.SZ	4.16308	0.207453	0.746626	-1.04187	1.96	0.136193	0.196709	1.71148	1.94591	22.0199	2	0	0.634339	0.499119	0.420867	0.408575	0.225756	3	1.57644	1.37234	-4.72918	7.52176
15	C29	2019	国恩股份	002768.SZ	4.07625	0.104832	0.715037	-1.05036	1.13	0.121945	0.177225	1.5466	1.94591	22.3046	3	0	0.660862	0.959232	0.488287	0.408779	0.229703	4	1.51317	1.12656	-3.93458	5.97451
15	C29	2020	国恩股份	002768.SZ	4.09234	0.133374	0.654901	-1.05508	1.105	0.18913	0.217039	2.11758	2.07944	22.421	2	0	0.613508	0.052906	0.411438	0.409167	0.228605	5	1.62997	0.949745	-3.86407	5.83921
15	C29	2021	国恩股份	002768.SZ	4.16174	0.175127	0.763185	-1.0574	1.435	0.106815	0.209451	1.67124	1.94591	23.0167	2	0	0.892699	0.256142	0.476562	0.437479	0.226999	6	1.1202	1.45251	-4.6549	7.41084
15	C29	2022	国恩股份	002768.SZ	4.16579	0.208634	0.685095	-1.08496	1.94	0.082755	0.173424	1.6062	1.94591	23.269	3	0	0.908537	-0.276424	0.537262	0.437856	0.525711	7	1.10067	1.39735	-4.50148	7.09364
15	C29	2023	国恩股份	002768.SZ	4.18126	0.250538	0.729302	-1.10388	1.67	0.049965	0.177567	1.62049	2.19722	23.4349	2	0	1.02529	0.007577	0.576172	0.437643	0.524099	8	0.975336	1.64922	-4.89246	7.81849
16	F52	2015	三夫户外	002780.SZ	4.05456	0.211143	0.527039	-0.927884	1.525	0.114475	0.028248	6.01799	1.94591	19.8756	3	0	0.306705	0.657821	0.159166	0.397883	0.203298	0	3.26046	0.586067	-3.5849	5.17085
16	F52	2016	三夫户外	002780.SZ	4.09915	0.311112	0.509597	-0.929236	1.645	0.10208	0.02414	5.1098	1.94591	19.9953	3	0	0.174024	0.531968	0.188362	0.39829	0.190802	1	5.74633	1.26486	-4.05923	6.04417
16	F52	2017	三夫户外	002780.SZ	4.15828	0.267935	0.673473	-0.862056	1.265	-0.025595	0.013676	4.89372	2.70805	20.5267	2	0	0.40848	0.406115	0.227154	0.394399	0.196199	2	2.4481	1.58628	-4.6832	7.36682
16	F52	2018	三夫户外	002780.SZ	4.14374	0.182952	0.612066	-0.964993	0.96	0.007383	0.138164	3.5738	2.19722	20.5854	3	0	0.631111	0.590348	0.266631	0.395875	0.206822	3	1.58451	1.10204	-4.04754	6.22259
16	F52	2019	三夫户外	002780.SZ	4.03326	0.150497	0.464822	-0.88917	0.85	-0.045216	0.246812	3.06477	2.19722	20.5372	2	0	0.357102	0.586789	0.260102	0.399328	0.210879	4	2.80032	0.625115	-3.029	4.14245
16	F52	2020	三夫户外	002780.SZ	4.03981	0.0707762	0.402526	-0.899602	0.44	-0.111228	0.280995	2.14418	2.19722	20.5007	1	0	0.314256	1.13423	0.308892	0.400753	0.220844	5	3.18211	0.224713	-2.47068	3.17436
16	F52	2021	三夫户外	002780.SZ	4.04442	0.242524	0.688636	-0.900459	0.985	-0.036166	0.251459	2.48364	2.48491	20.7344	2	0	0.365437	1.12134	0.291645	0.394031	0.199376	6	2.73645	1.25168	-4.31866	6.51331
16	F52	2022	三夫户外	002780.SZ	4.02142	0.230986	0.507197	-0.909466	0.965	-0.049194	0.230915	1.97534	1.94591	20.7915	2	0	0.468354	0.621983	0.361452	0.398346	0.100818	7	2.13514	0.821198	-3.49803	4.93189
16	F52	2023	三夫户外	002780.SZ	4.02372	0.169604	0.418049	-0.931898	0.605	0.0277467	0.2078	1.99207	2.19722	20.8232	1	0	0.51318	0.69156	0.360198	0.380259	0.108491	8	1.94863	0.228322	-2.89972	3.86283
17	C18	2015	比音勒芬	002832.SZ	3.92125	0.311885	0.49552	-0.988733	1.12	0.193509	0.003517	3.82491	1.94591	20.9494	2	0	0.619344	0.203726	0.22993	0.399874	0.14471	0	1.50946	1.07467	-3.51148	4.71186
17	C18	2016	比音勒芬	002832.SZ	3.96306	0.389995	0.457988	-0.990486	1.87	0.152891	0.002483	7.21991	1.94591	21.1109	3	0	0.53167	0.164551	0.128729	0.400004	0.143237	0	1.88087	1.19444	-3.80824	5.2658
17	C18	2017	比音勒芬	002832.SZ	4.10373	0.60112	0.652809	-0.992239	2.94	0.147151	0.00316	5.20726	2.19722	21.2724	2	0	0.443996	0.125376	0.166912	0.399328	0.139253	1	2.25227	2.15432	-5.84394	9.14603
17	C18	2018	比音勒芬	002832.SZ	4.06458	0.498664	0.414615	-1.01493	1.685	0.197743	0.004274	3.78122	1.94591	21.4744	1	0	0.523546	0.086201	0.231287	0.400154	0.141186	2	1.91005	1.25721	-4.37649	6.40246
17	C18	2019	比音勒芬	002832.SZ	4.02051	0.40112	0.48132	-1.01664	1.62	0.228808	0.086762	3.55131	2.19722	21.6493	3	0	0.390593	0.050759	0.224211	0.399923	0.143027	3	2.56021	0.9313	-4.10602	5.91384
17	C18	2020	比音勒芬	002832.SZ	4.01647	0.474296	0.574965	-1.02484	1.67	0.203387	0.063815	4.61383	2.19722	22.0446	2	0	0.485764	0.073989	0.355029	0.399599	0.141646	4	2.05861	1.57565	-4.76635	7.08583
17	C18	2021	比音勒芬	002832.SZ	4.05165	0.310463	0.755534	-1.04575	1.535	0.187856	0.050245	3.36931	2.07944	22.3049	1	0	0.40263	-0.00999	0.332421	0.39897	0.244737	5	2.48367	1.21652	-4.88409	7.52929
17	C18	2022	比音勒芬	002832.SZ	4.07866	0.59762	0.627797	-1.05207	2.235	0.182835	0.082724	3.25829	2.07944	22.4423	1	0	0.438151	-0.275907	0.259443	0.416325	0.239319	6	2.28232	2.19303	-5.66175	8.7629
17	C18	2023	比音勒芬	002832.SZ	4.01363	0.438636	0.595526	-1.07822	1.755	0.193136	0.08631	2.79837	2.07944	22.6295	3	0	0.427688	-0.334614	0.271999	0.416419	0.242319	7	2.33815	1.08507	-4.68956	6.97098
18	L72	2015	元隆雅图	002878.SZ	3.94927	0.0111998	0.385533	-0.835876	1.645	0.116871	0.061522	2.09596	1.60944	19.7029	3	0	0.526341	-0.814258	0.437651	0.384437	0.0326979	0	1.89106	0.14454	-1.90273	2.00779
18	L72	2016	元隆雅图	002878.SZ	4.00378	0.0155596	0.322461	-0.881963	1.555	0.107763	0.046728	1.89014	1.94591	20.045	3	0	0.5421	-0.386355	0.503376	0.38611	0.0321529	0	1.84181	0.0980071	-1.82675	1.9495
18	L72	2017	元隆雅图	002878.SZ	4.17423	0.0511993	0.409164	-0.92805	3.255	0.15507	0.030593	3.67471	2.3979	20.387	2	0	0.557859	0.100048	0.266969	0.383803	0.0276979	0	1.79257	0.41989	-2.78949	4.01974
18	L72	2018	元隆雅图	002878.SZ	4.10783	0.0466218	0.520908	-0.974137	2.72	0.147067	0.007371	2.17658	1.94591	20.729	2	0	0.573618	0.586451	0.36484	0.380748	0.0282702	1	1.74332	0.510042	-3.0214	4.35407
18	L72	2019	元隆雅图	002878.SZ	4.05574	0.0411822	0.678995	-1.00984	2.965	0.147714	0.006922	1.87011	1.94591	21.0042	3	0	0.579305	0.553454	0.441876	0.376262	0.0289501	2	1.72621	0.991634	-3.47051	5.12441
18	L72	2020	元隆雅图	002878.SZ	4.05214	0.041189	0.429987	-1.00091	2.68	0.177784	0.009002	2.06473	2.30259	21.0983	3	0	0.317902	0.122287	0.407284	0.383241	0.0289492	3	3.14562	0.0144774	-2.4885	3.25781
18	L72	2021	元隆雅图	002878.SZ	4.03196	0.0185434	0.476245	-0.987211	1.685	0.113205	0.00847	1.83822	2.07944	21.2905	2	0	0.37861	0.422871	0.471041	0.40181	0.0317799	4	2.64124	0.347868	-2.5181	3.303
18	L72	2022	元隆雅图	002878.SZ	4.05966	0.0278722	0.460806	-1.01235	2.35	0.11986	0.008555	2.0322	2.07944	21.3085	1	0	0.460089	0.369639	0.422688	0.40178	0.0406138	5	2.17349	0.476995	-2.57408	3.44555
18	L72	2023	元隆雅图	002878.SZ	4.04112	0.0194156	0.439769	-1.01523	1.95	0.015576	0.005936	2.17566	2.30259	21.698	3	0	0.536899	-0.162638	0.405848	0.402627	0.0416709	6	1.86255	0.22963	-2.40489	3.10275
19	C24	2015	英派斯	002899.SZ	3.90833	0.309482	0.386082	-0.917872	2.67	0.119649	0.29566	1.67263	2.19722	20.8397	1	0	0.546369	0.642852	0.415997	0.343775	0.252075	0	1.7492	0.859368	-3.03824	3.79623
19	C24	2016	英派斯	002899.SZ	3.91068	0.45512	0.307748	-0.935507	3.075	0.127182	0.266051	1.74917	2.19722	20.8814	1	0	0.606084	0.55961	0.376523	0.34418	0.249726	0	1.62558	0.962021	-3.34812	4.24301
19	C24	2017	英派斯	002899.SZ	4.0705	0.325364	0.717638	-0.953142	2.77	0.109468	0.147425	3.55125	2.19722	20.923	3	0	0.665799	0.476368	0.220802	0.39236	0.251819	0	1.50196	1.46249	-4.85105	7.48306
19	C24	2018	英派斯	002899.SZ	4.14374	0.511189	0.603703	-0.970777	3.495	0.066681	0.150267	3.58886	2.19722	20.9647	3	0	0.725514	0.393126	0.210141	0.392722	0.248822	1	1.37833	1.83326	-5.38768	8.43666
19	C24	2019	英派斯	002899.SZ	4.15479	0.534392	0.550102	-0.918209	3.915	0.0532743	0.141503	4.56939	2.30259	20.9549	1	0	0.750835	0.309884	0.171271	0.392893	0.248448	2	1.33185	1.85389	-5.30629	8.27771
19	C24	2020	英派斯	002899.SZ	4.1485	0.634392	0.590522	-0.983028	4.07	0.0398547	0.120812	3.81385	2.56495	21.0321	1	0	0.740178	0.368063	0.20375	0.392764	0.446835	3	1.35103	1.92916	-5.86476	9.22644
19	C24	2021	英派斯	002899.SZ	4.13784	0.599794	0.672369	-0.964325	2.695	0.0143753	0.088398	4.27982	2.30259	21.2984	2	0	0.703335	0.294558	0.382729	0.392504	0.447393	4	1.4218	2.08829	-6.00983	9.51797
19	C24	2022	英派斯	002899.SZ	4.07204	0.615802	0.558196	-0.988373	4.42	0.0452767	0.063404	2.69613	2.19722	21.4313	3	0	0.855718	0.354343	0.42849	0.392867	0.547135	5	1.16861	2.32235	-5.44765	8.32831
19	C24	2023	英派斯	002899.SZ	4.02751	0.595248	0.557727	-1.01824	3.795	0.053578	0.074601	2.06874	2.63906	21.5539	3	0	0.754852	-0.101161	0.459326	0.410825	0.547466	6	1.32476	1.85852	-5.2357	7.87354
20	I65	2015	神州泰岳	300002.SZ	3.91145	0.166655	0.4361	-1.04142	1.415	0.0678537	0.058111	2.89265	2.48491	22.4993	3	0	0.342647	0.433434	0.156048	0.395523	0.189909	6	2.91846	0.725479	-2.64483	3.19746
20	I65	2016	神州泰岳	300002.SZ	3.91394	0.1494	0.489399	-1.04236	1.34	0.0947473	0.061309	1.82205	2.77259	22.6736	3	0	0.445842	0.137134	0.283951	0.39533	0.190234	7	2.24295	0.705741	-2.78765	3.48927
20	I65	2017	神州泰岳	300002.SZ	4.04389	0.167092	0.57863	-1.03649	1.545	0.018581	0.061113	1.90277	2.3979	22.6583	1	0	0.588573	-0.113207	0.257725	0.395007	0.1899	8	1.69903	0.650773	-3.57228	5.17295
20	I65	2018	神州泰岳	300002.SZ	4.20363	0.24449	0.65538	-0.985696	2.135	0.01559	0.061548	1.82465	2.48491	22.6156	3	0	0.881495	1.6055	0.211728	0.394727	0.28844	9	1.13444	1.31921	-4.64096	7.38488
20	I65	2019	神州泰岳	300002.SZ	4.16526	0.221196	0.73991	-0.972357	2.68	-0.33933	0.07353	1.34583	2.48491	22.3877	2	0	0.710655	0.627374	0.290779	0.394419	0.28888	10	1.40715	0.647034	-4.76653	7.58252
20	I65	2020	神州泰岳	300002.SZ	4.09849	0.245611	0.551462	-1.03063	2.97	0.0835377	0.072581	1.58437	2.07944	22.37	2	0	0.507447	0.390251	0.237785	0.395105	0.288419	11	1.97065	0.896516	-3.94687	5.89507
20	I65	2021	神州泰岳	300002.SZ	4.1053	0.203809	0.498318	-1.00904	2.98	0.0932273	0.072588	2.20046	2.19722	22.3811	1	0	0.432922	0.35468	0.17428	0.395298	0.289208	12	2.30989	0.334683	-3.58358	5.25938
20	I65	2022	神州泰岳	300002.SZ	4.07783	0.203513	0.466878	-1.06365	2.865	0.126711	0.041514	2.94471	2.30259	22.4842	3	0	0.63139	0.360457	0.166397	0.412954	0.289213	13	1.58381	0.523778	-3.38301	4.83428
20	I65	2023	神州泰岳	300002.SZ	4.04128	0.208756	0.539213	-1.07547	2.88	0.182639	0.050188	3.88461	1.94591	22.6406	1	0	0.387963	0.367497	0.149352	0.412735	0.289114	14	2.57756	0.823815	-3.5854	5.15223
21	C18	2015	探路者	300005.SZ	4.11722	0.0717269	0.625577	-0.992739	3.98	0.147168	0.088057	1.65935	2.07944	21.6891	1	0	0.275831	0.475005	0.397269	0.399423	0.149242	6	3.62541	0.748119	-3.56116	5.3674
21	C18	2016	探路者	300005.SZ	4.03533	0.08076	0.335486	-1.01819	3.615	0.0461777	0.062558	3.58696	2.19722	22.0128	1	0	0.471974	0.922898	0.202314	0.400426	0.149071	4	2.56107	0.398917	-2.23826	2.71671
21	C18	2017	探路者	300005.SZ	4.11603	0.122028	0.580574	-0.940702	1.88	-0.0460683	0.075606	3.78167	2.3979	21.9126	1	0	0.668117	0.592111	0.20111	0.399579	0.148292	8	1.49674	0.568207	-3.59256	5.37511
21	C18	2018	探路者	300005.SZ	4.1118	0.126433	0.565867	-0.926916	4.225	-0.101611	0.076507	5.63128	2.07944	21.7515	2	0	0.872849	1.05295	0.153842	0.39963	0.148209	9	1.14567	0.578141	-3.54177	5.26754
21	C18	2019	探路者	300005.SZ	4.04279	0.38372	0.666245	-0.995194	4.04	0.0492073	0.063464	5.53294	2.30259	21.7881	1	0	0.723195	0.775209	0.15686	0.399282	0.143355	10	1.38275	1.2706	-4.81724	7.31544
21	C18	2020	探路者	300005.SZ	3.95231	0.0422563	0.318841	-0.90353	2.315	-0.143006	0.074858	7.50934	2.70805	21.5986	1	0	0.456037	1.67468	0.117196	0.400483	0.149798	11	2.1928	0.0726593	-1.78076	1.75093
21	C18	2021	探路者	300005.SZ	4.04906	0.0745132	0.674214	-0.947551	1.76	0.0289433	0.072211	6.5654	2.77259	21.6495	1	0	0.277012	1.34587	0.141777	0.378855	0.149189	12	3.60995	1.20016	-3.57261	5.27381
21	C18	2022	探路者	300005.SZ	4.03807	0.0546725	0.383047	-0.943951	2.585	0.0276193	0.088544	4.58714	1.94591	21.6925	2	0	0.363578	0.376487	0.209274	0.38009	0.0795634	13	2.75044	0.422592	-2.32244	2.90657
21	C18	2023	探路者	300005.SZ	4.00499	0.0152522	0.354177	-1.03413	1.43	0.021631	0.08749	3.7174	1.94591	21.6926	2	0	0.413131	0.227435	0.201411	0.380212	0.0803071	14	2.42054	0.098147	-1.95264	2.19033
22	I64	2015	宝通科技	300031.SZ	4.00397	0.0345998	0.336892	-0.912824	1.78	0.0913687	0.281849	4.97993	2.19722	20.7638	1	0	0.141512	0.048034	0.121371	0.356753	0.213975	6	7.06653	0.00596741	-1.96326	2.18961
22	I64	2016	宝通科技	300031.SZ	3.9943	0.0199696	0.623739	-1.08241	0.84	0.11546	0.09317	3.7789	2.19722	21.8554	3	0	0.48771	0.081381	0.137412	0.356186	0.214077	7	2.0504	0.776064	-2.9948	4.14263
22	I64	2017	宝通科技	300031.SZ	4.23846	0.175559	0.443725	-1.01774	0.845	0.0996377	0.082852	2.04369	2.07944	21.8881	3	0	0.583171	-0.035791	0.266561	0.356542	0.212989	8	1.71476	0.404737	-3.62361	5.58304
22	I64	2018	宝通科技	300031.SZ	4.1562	0.272584	0.535455	-0.967122	0.84	0.119505	0.075831	2.22857	2.30259	21.8976	1	0	0.630365	0.107934	0.289089	0.40126	0.212311	9	1.58638	1.06405	-4.15809	6.36382
22	I64	2019	宝通科技	300031.SZ	4.09118	0.108702	0.620378	-1.03661	1.035	0.102695	0.058091	1.70329	2.19722	22.1146	1	0	0.59783	0.204428	0.343241	0.401152	0.213457	10	1.67272	1.30358	-3.6229	5.40476
22	I64	2020	宝通科技	300031.SZ	4.06238	0.228597	0.597398	-1.04772	1.88	0.131224	0.047177	1.59097	2.30259	22.2849	2	0	0.558139	0.073828	0.352675	0.401181	0.212618	11	1.79167	1.26971	-3.95432	5.86641
22	I64	2021	宝通科技	300031.SZ	4.04535	0.0638438	0.722566	-1.00006	0.905	0.0995257	0.139619	1.49557	2.3979	22.4028	2	0	0.466154	0.235496	0.273845	0.401023	0.113771	12	2.14521	1.2278	-3.7064	5.53175
22	I64	2022	宝通科技	300031.SZ	4.02965	0.132454	0.629509	-0.983956	1.18	-0.11667	0.176914	1.47677	2.07944	22.4006	3	0	0.745057	0.010385	0.343637	0.401141	0.413291	13	1.34218	1.02686	-3.58632	5.21034
22	I64	2023	宝通科技	300031.SZ	4.04999	0.164883	0.595678	-1.05619	1.235	0.0262777	0.160757	1.51959	2.07944	22.4817	2	0	0.641648	0.4182	0.348436	0.401184	0.413064	14	1.55849	0.510971	-3.6466	5.32603
23	I64	2015	星辉娱乐	300043.SZ	3.99225	0.62622	0.304296	-0.947787	2.305	0.171481	0.220754	1.12769	2.07944	21.9175	1	0	0.251305	0.151255	0.497127	0.356818	0.209838	5	2.94475	1.47712	-4.27765	5.9694
23	I64	2016	星辉娱乐	300043.SZ	3.99597	0.514877	0.344931	-1.03816	2.415	0.137819	0.194646	0.920769	2.07944	22.3568	2	0	0.441923	0.023291	0.529919	0.356738	0.210617	6	2.26284	0.866824	-3.98098	5.52371
23	I64	2017	星辉娱乐	300043.SZ	4.16441	0.545261	0.633765	-1.03781	2.255	0.0583767	0.168538	0.713843	2.19722	22.5116	2	0	0.632541	-0.104673	0.562711	0.356166	0.210404	7	1.58092	1.59755	-5.70516	9.03858
23	I64	2018	星辉娱乐	300043.SZ	4.09449	0.463616	0.619713	-1.04469	2.29	0.0538297	0.220863	0.647852	1.94591	22.5076	1	0	0.862671	-0.035262	0.535756	0.401153	0.210975	8	1.15919	1.67772	-5.1139	7.88375
23	I64	2019	星辉娱乐	300043.SZ	4.06613	0.277932	0.580574	-1.04685	2.185	0.0596533	0.225917	0.586173	2.19722	22.4707	3	0	0.694423	-0.429778	0.486492	0.401203	0.112273	9	1.44004	1.23381	-4.10544	6.11008
23	I64	2020	星辉娱乐	300043.SZ	3.9741	0.263352	0.625577	-1.04406	3.61	0.00630633	0.237861	0.449841	2.19722	22.4022	2	0	0.843811	-0.196779	0.451719	0.401146	0.112375	10	1.1851	1.27328	-3.96356	5.70376
23	I64	2021	星辉娱乐	300043.SZ	3.96594	0.287356	0.412669	-0.918308	1.71	-0.183796	0.255849	0.288224	2.19722	22.2284	1	0	0.714439	0.077187	0.527682	0.401415	0.212208	11	1.3997	0.581599	-3.21011	4.23891
23	I64	2022	星辉娱乐	300043.SZ	4.05568	0.60915	0.49654	-0.973789	2.445	-0.0943927	0.269582	0.365112	1.94591	22.1887	1	0	0.757534	-0.41441	0.571188	0.417926	0.209957	12	1.32007	1.78714	-5.13356	7.71276
23	I64	2023	星辉娱乐	300043.SZ	4.07438	0.687304	0.618536	-0.97573	2.27	0.00850633	0.273472	0.414269	2.30259	22.1866	3	0	0.617065	-0.644551	0.552472	0.417795	0.209411	13	1.62057	1.93748	-5.98876	9.2866
24	I64	2015	中青宝	300052.SZ	3.91432	0.0127805	0.491344	-0.971149	3.77	0.0614803	0.021548	3.24023	2.19722	20.9511	1	0	0.161295	-0.429145	0.176156	0.401316	0.214128	5	6.19983	0.329731	-2.22494	2.55903
24	I64	2016	中青宝	300052.SZ	3.93949	0.00988101	0.453016	-0.901967	1.28	-0.0753407	0.015505	4.49092	1.94591	20.8229	1	0	0.173928	0.594416	0.116416	0.401364	0.214148	6	5.7495	0.736012	-2.13337	2.42995
24	I64	2017	中青宝	300052.SZ	4.15864	0.016737	0.635246	-0.969382	3.875	0.0570833	0.111022	1.61954	2.19722	20.8542	2	0	0.280289	0.318583	0.312569	0.401133	0.2141	7	3.56774	0.915629	-3.4844	5.3448
24	I64	2018	中青宝	300052.SZ	4.14672	0.0126683	0.644065	-0.97197	6.71	0.0424667	0.0891	1.22229	1.94591	20.9286	3	0	0.395732	1.42355	0.377009	0.401122	0.214128	8	2.52696	0.496488	-3.46858	5.2992
24	I64	2019	中青宝	300052.SZ	4.0912	0.282346	0.547354	-0.988732	9.53	0.0426173	0.118824	1.20909	1.94591	21.0714	1	0	0.306388	1.82111	0.4102	0.401245	0.212243	9	3.26384	1.45159	-4.06415	6.06886
24	I64	2020	中青宝	300052.SZ	3.99862	0.0825169	0.545742	-0.902297	4.11	-0.1642	0.236717	1.23871	2.19722	20.7607	1	0	0.373918	-0.050516	0.339199	0.401247	0.21364	10	2.67438	0.335796	-2.96399	4.02944
24	I64	2021	中青宝	300052.SZ	4.08619	0.0714426	0.366525	-0.877042	7.685	-0.0556767	0.2263	1.01527	1.94591	20.7818	3	0	0.118222	-0.151873	0.410734	0.418065	0.213717	11	8.45866	0.493142	-2.46226	3.23434
24	I64	2022	中青宝	300052.SZ	4.1023	0.0913808	0.55058	-0.903926	11.63	-0.102527	0.253181	0.743582	2.07944	20.6745	3	0	0.168547	-0.239633	0.432391	0.417868	0.213578	12	5.93305	0.480195	-3.30901	4.84555
24	I64	2023	中青宝	300052.SZ	4.11371	0.238844	0.594967	-0.902524	9.41	-0.079908	0.345276	0.76506	1.79176	20.6152	3	0	0.183852	-0.073617	0.488295	0.417821	0.412547	13	5.43916	0.974697	-4.13082	6.27543
25	I64	2015	顺网科技	300113.SZ	3.93221	0.0299618	0.493564	-1.02878	4.345	0.246255	0.02102	2.43997	2.07944	21.3698	3	0	0.099685	0.290851	0.219062	0.401313	0.214008	5	10.0316	0.6875	-2.35533	2.81859
25	I64	2016	顺网科技	300113.SZ	3.93967	0.0211886	0.545265	-1.04981	4.27	0.289903	0.021092	1.82673	2.3979	21.9506	2	0	0.251226	-0.022883	0.245498	0.401247	0.214069	6	3.98047	0.525619	-2.54126	3.19191
25	I64	2017	顺网科技	300113.SZ	4.03637	0.0711955	0.646063	-1.03457	7.365	0.217666	0.017206	2.76058	2.19722	22.1047	2	0	0.387072	0.232457	0.197784	0.40112	0.213719	7	2.5835	0.758546	-3.41349	4.95466
25	I64	2018	顺网科技	300113.SZ	4.03054	0.0633928	0.447521	-0.976832	5.775	0.146468	0.016918	2.88418	2.07944	22.0806	2	0	0.499967	-0.148071	0.202607	0.401371	0.213774	8	2.00013	0.384609	-2.5896	3.39171
25	I64	2019	顺网科技	300113.SZ	4.01239	0.0522297	0.450529	-1.01711	7.51	0.050182	0.019127	2.56251	2.19722	21.9611	2	0	0.24801	-0.280365	0.227555	0.401367	0.213852	9	4.0321	0.481394	-2.50404	3.21068
25	I64	2020	顺网科技	300113.SZ	4.02764	0.0622291	0.444975	-1.00785	9.185	0.0492597	0.016221	3.12322	1.94591	21.8004	2	0	0.310101	-0.306682	0.137949	0.401374	0.213782	10	3.22475	0.0915459	-2.56669	3.34467
25	I64	2021	顺网科技	300113.SZ	4.06719	0.0886068	0.636511	-0.981375	8.195	0.0368573	0.022909	3.46265	1.94591	21.8162	1	0	0.326262	-0.298942	0.166942	0.417776	0.413597	11	3.06502	0.809188	-3.53495	5.21842
25	I64	2022	顺网科技	300113.SZ	4.03097	0.074442	0.610833	-1.0048	7.84	-0.200903	0.049174	4.23591	2.30259	21.5546	3	0	0.30284	-0.052729	0.155802	0.417804	0.513696	12	3.30208	0.660342	-3.27449	4.67918
25	I64	2023	顺网科技	300113.SZ	4.07348	0.0849105	0.641277	-1.02807	8.02	0.10744	0.067786	4.49133	1.94591	21.6182	1	0	0.296336	-0.240758	0.145329	0.417771	0.513623	13	3.37455	0.454106	-3.55563	5.27165
26	C14	2015	汤臣倍健	300146.SZ	3.93143	0.101119	0.213301	-1.06067	1.415	0.205259	0.101269	9.36431	2.07944	22.3136	1	0	0.310747	-0.195698	0.071666	0.340719	0.219046	5	3.21805	0.121159	-1.55676	1.5
26	C14	2016	汤臣倍健	300146.SZ	3.93001	0.0999871	0.270863	-1.04884	2.21	0.13097	0.112902	5.32672	2.07944	22.3963	3	0	0.411602	-0.416772	0.117233	0.340173	0.219078	6	2.42953	0.0245678	-1.77275	1.64175
26	C14	2017	汤臣倍健	300146.SZ	3.93615	0.108893	0.360028	-1.05862	1.34	0.175843	0.10794	4.44719	2.07944	22.5338	1	0	0.378342	-0.11939	0.160568	0.390724	0.218824	7	2.64311	0.784381	-2.17519	2.4056
26	C14	2018	汤臣倍健	300146.SZ	4.09427	0.307494	0.318301	-1.08552	1.19	0.145168	0.067186	2.74657	1.94591	23.0047	1	0	0.475085	-0.257618	0.296462	0.390963	0.31315	8	2.10489	0.427849	-3.28378	4.57041
26	C14	2019	汤臣倍健	300146.SZ	4.10488	0.128161	0.460437	-1.0722	1.2	-0.062415	0.099432	2.1674	1.94591	22.8432	2	0	0.429614	-0.375826	0.288009	0.390145	0.318273	9	2.32767	0.164259	-3.11815	4.45174
26	C14	2020	汤臣倍健	300146.SZ	4.10197	0.153264	0.714853	-1.06533	1.12	0.225234	0.090586	2.16719	2.30259	22.9892	1	0	0.353417	-0.443172	0.279856	0.388665	0.317556	10	2.82952	1.38721	-4.20814	6.48732
26	C14	2021	汤臣倍健	300146.SZ	4.10315	0.117041	0.403543	-1.08832	1.01	0.201676	0.063905	3.54323	1.94591	23.2856	2	0	0.381589	-0.233743	0.187369	0.390473	0.318591	11	2.62062	0.290763	-2.84475	3.94188
26	C14	2022	汤臣倍健	300146.SZ	4.14552	0.301631	0.506516	-1.08442	3.01	0.143798	0.068682	3.44148	1.94591	23.3003	2	0	0.413921	-0.122447	0.182511	0.423906	0.413317	12	2.41592	1.1954	-4.13683	6.27715
26	C14	2023	汤臣倍健	300146.SZ	4.18442	0.456541	0.67439	-1.10817	3.955	0.165175	0.059978	3.37502	2.19722	23.4378	1	0	0.576086	-0.256936	0.189139	0.423212	0.508891	13	1.73585	1.9579	-5.54846	8.8626
27	C29	2015	安利股份	300218.SZ	3.91107	0.598843	0.423335	-1.00239	2.795	0.045984	0.556169	1.03042	2.56495	21.3158	1	0	0.456337	-0.069799	0.434887	0.392652	0.210703	4	2.19136	1.62129	-4.40147	6.0971
27	C29	2016	安利股份	300218.SZ	3.91014	0.0862176	0.426669	-0.990256	2.79	0.0460193	0.537507	0.992245	2.48491	21.3762	3	0	0.501699	0.057265	0.446166	0.392627	0.230419	5	1.99323	0.227891	-2.26796	2.56089
27	C29	2017	安利股份	300218.SZ	3.90991	0.174565	0.421159	-0.910872	2.705	-0.0103513	0.555164	1.08063	2.56495	21.3912	3	0	0.687759	-0.022806	0.46527	0.392668	0.227021	6	1.454	0.296286	-2.61529	3.1311
27	C29	2018	安利股份	300218.SZ	3.95675	0.245271	0.58426	-1.00075	2.445	0.0141863	0.4814	1.02348	2.83321	21.4593	1	0	0.890007	-0.018078	0.490975	0.40962	0.224302	7	1.12359	1.39455	-3.67829	5.15251
27	C29	2019	安利股份	300218.SZ	4.08368	0.221655	0.658554	-1.00374	1.545	0.0470713	0.478931	1.40993	2.48491	21.4401	1	0	0.780377	0.075875	0.441049	0.409143	0.22521	8	1.28143	1.20501	-4.22341	6.41831
27	C29	2020	安利股份	300218.SZ	4.07249	0.640343	0.530826	-0.998891	2.735	0.0337817	0.440037	1.36348	2.48491	21.4555	3	0	0.66829	0.005807	0.431692	0.409961	0.209106	9	1.49636	2.07158	-5.4447	8.29914
27	C29	2021	安利股份	300218.SZ	4.0061	0.154471	0.409103	-0.99113	2.12	0.0832643	0.400005	1.45046	2.77259	21.5132	1	0	0.469217	0.043539	0.430158	0.410734	0.227794	10	2.13121	0.63801	-2.7524	3.5696
27	C29	2022	安利股份	300218.SZ	4.05796	0.535741	0.444802	-1.00271	3.335	0.0919003	0.422525	1.55952	2.48491	21.5522	2	0	0.75515	-0.137335	0.378079	0.410508	0.51313	11	1.32424	1.38369	-4.63093	6.83688
27	C29	2023	安利股份	300218.SZ	4.04056	0.602663	0.573186	-1.02169	3.155	0.0402707	0.408691	1.70184	2.56495	21.5082	1	0	0.589066	0.022428	0.358688	0.40969	0.510556	12	1.6976	1.84015	-5.36345	8.12981
28	I64	2015	掌趣科技	300315.SZ	3.92311	0.266504	0.217781	-1.07035	10.985	0.0989017	0.013859	0.813978	2.48491	22.7874	1	0	0.300039	0.491347	0.184777	0.356988	0.212353	3	3.3329	0.196807	-2.24274	2.35595
28	I64	2016	掌趣科技	300315.SZ	3.92601	0.206852	0.167683	-1.0857	10.215	0.0788203	0.010365	2.98874	2.56495	23.0652	2	0	0.464994	0.243014	0.184898	0.357087	0.212771	4	2.15056	0.297017	-1.80578	1.59188
28	I64	2017	掌趣科技	300315.SZ	3.92341	0.221146	0.226558	-1.05963	10.255	0.0386673	0.00392	4.00835	2.48491	23.0142	1	0	0.605053	0.082091	0.129841	0.356971	0.212671	5	1.65275	0.417626	-2.08814	2.10845
28	I64	2018	掌趣科技	300315.SZ	3.96886	0.399611	0.421216	-0.99394	11.34	-0.528818	0.005622	2.28048	2.56495	22.4909	3	0	0.575181	-0.112461	0.124494	0.356587	0.211423	6	1.73858	1.20567	-3.7211	5.10075
28	I64	2019	掌趣科技	300315.SZ	4.11062	0.599137	0.563571	-0.980901	14.3	0.080839	0.003654	5.07204	2.48491	22.5129	2	0	0.356369	-0.179127	0.07354	0.401224	0.210027	7	2.80608	2.35838	-5.50652	8.52005
28	I64	2020	掌趣科技	300315.SZ	4.03658	0.433191	0.425796	-1.00228	13.455	0.06793	0.002962	4.54959	2.30259	22.551	3	0	0.432227	-0.039289	0.110697	0.401398	0.211188	8	2.3136	1.16071	-4.06823	5.837
28	I64	2021	掌趣科技	300315.SZ	4.10317	0.0213807	0.557148	-0.925973	3.77	-0.310656	0.003392	4.5941	2.30259	22.3007	1	0	0.355161	-0.188043	0.134693	0.401232	0.314068	9	2.81562	0.327947	-3.04432	4.41482
28	I64	2022	掌趣科技	300315.SZ	4.05739	0.406502	0.591919	-0.972668	11.19	0.0253093	0.00266	5.13707	2.3979	22.3726	2	0	0.562452	-0.107672	0.121954	0.401188	0.411374	10	1.77793	1.40434	-4.66307	7.02486
28	I64	2023	掌趣科技	300315.SZ	4.07306	0.501917	0.507579	-0.973363	14.225	0.047736	0.002391	6.39307	2.19722	22.378	1	0	0.371147	0.124694	0.091039	0.401295	0.410707	11	2.69435	1.63585	-4.77662	7.17137
29	C35	2015	中潜股份	300526.SZ	4.05433	0.199635	0.52087	-0.930115	2.605	0.079993	0.171423	1.04027	1.79176	20.1072	3	0	-0.003002	0.332465	0.496258	0.406533	0.310857	0	6.26704	0.301622	-3.51205	5.04383
29	C35	2016	中潜股份	300526.SZ	4.05398	0.188113	0.499235	-0.941129	2.67	0.076444	0.121167	1.33102	1.79176	20.3356	3	0	0.239843	0.214198	0.272395	0.406751	0.311535	0	4.16939	0.663004	-3.37844	4.80151
29	C35	2017	中潜股份	300526.SZ	4.05193	0.179931	0.647332	-0.952143	2.735	0.0737107	0.092378	0.840006	1.79176	20.564	1	0	0.482688	0.095931	0.384593	0.405248	0.312016	1	2.07173	1.27865	-3.91659	5.8259
29	C35	2018	中潜股份	300526.SZ	4.01489	0.0989454	0.650364	-0.969711	1.625	0.0310217	0.248587	0.641978	1.79176	20.7742	3	0	0.685761	0.117932	0.480256	0.405217	0.31678	2	1.45823	1.33005	-3.48644	5.02993
29	C35	2019	中潜股份	300526.SZ	4.06353	0.219842	0.58541	-0.977251	2.84	0.002423	0.225705	0.815793	2.3979	20.7822	2	0	0.105907	0.326129	0.46073	0.405879	0.309669	3	9.44229	1.27412	-3.87413	5.72506
29	C35	2020	中潜股份	300526.SZ	4.1358	0.41257	0.643366	-0.858567	2.76	-0.316838	0.273291	0.239345	2.19722	20.3004	2	0	0.049449	-0.526768	0.429419	0.405289	0.398332	4	20.2228	1.42828	-5.10791	7.99116
29	C35	2021	中潜股份	300526.SZ	4.10476	0.397716	0.563571	-0.827353	2.56	-0.326519	0.328306	0.722984	2.30259	20.1111	2	0	0.113546	0.600743	0.572481	0.421999	0.299205	5	8.80701	1.44665	-4.64775	7.08273
29	C35	2022	中潜股份	300526.SZ	4.08728	0.318458	0.604217	-0.96067	2.22	-0.0369797	0.383321	1.20662	2.63906	19.7865	1	0	0.151256	1.72825	0.715543	0.421647	0.303868	6	6.61131	1.4161	-4.4262	6.7126
29	C35	2023	中潜股份	300526.SZ	4.20662	0.611774	0.687881	-1.09399	4.88	0	0.438336	1.69026	2.83321	19.4618	1	0	0.188966	6.85576	0.858605	0.420918	0.586614	0	4.41561	2.22501	-6.31227	10.1927
30	I65	2015	冰川网络	300533.SZ	3.99584	0.0544495	0.560039	-0.997058	9.095	0.24019	0.010548	2.61619	1.94591	21.2816	1	0	0.223099	-0.04966	0.369566	0.395074	0.292026	0	3.26939	0.780482	-2.89465	3.92127
30	I65	2016	冰川网络	300533.SZ	4.01154	0.0599964	0.0103516	-0.985284	11.26	0.156586	0.004429	7.09266	1.94591	21.2766	2	0	0.399571	-0.008024	0.139173	0.39705	0.291921	0	2.50269	0.664018	-0.815921	1.5
30	I65	2017	冰川网络	300533.SZ	4.13463	0.0974137	0.723055	-0.97351	15.37	0.0697893	0.003588	7.78263	1.94591	21.2716	1	0	0.576043	0.033612	0.125869	0.394481	0.291215	1	1.73598	0.865656	-4.09763	6.38718
30	I65	2018	冰川网络	300533.SZ	4.09919	0.0912395	0.558268	-0.989036	14.955	0.0746287	0.001932	7.29277	2.48491	21.3174	2	0	0.760979	0.07703	0.133426	0.395081	0.291332	2	1.3141	0.690662	-3.32975	4.87984
30	I65	2019	冰川网络	300533.SZ	4.01565	0.052594	0.101731	-1.01013	13.9	0.118145	0.001525	8.07035	1.94591	21.3805	1	0	0.52028	0.259203	0.119529	0.396724	0.292061	3	1.92204	0.741127	-1.15313	1.5
30	I65	2020	冰川网络	300533.SZ	4.04487	0.0699321	0.661022	-1.00404	16.28	0.065222	0.003451	7.01196	2.07944	21.4117	1	0	0.601927	-0.065211	0.136111	0.394707	0.291734	4	1.66133	0.820618	-3.49027	5.11542
30	I65	2021	冰川网络	300533.SZ	4.07049	0.0796305	0.706133	-0.912514	15.77	-0.0395913	0.004035	3.99232	1.94591	21.4992	3	0	0.703623	0.902517	0.244908	0.412225	0.291551	5	1.42121	0.823179	-3.77837	5.69398
30	I65	2022	冰川网络	300533.SZ	4.08603	0.0866729	0.684008	-1.13214	9.295	0.0474263	0.007259	2.53986	2.07944	21.7574	3	0	0.666818	0.839991	0.373466	0.412293	0.491418	6	1.49966	0.828652	-3.76478	5.68691
30	I65	2023	冰川网络	300533.SZ	4.01308	0.055174	0.693135	-1.03289	9.6	0.142335	0.006077	2.34827	1.94591	21.7023	1	0	0.442459	-0.069647	0.395303	0.412265	0.292012	7	2.2601	0.791143	-3.46527	5.03018
31	C24	2015	金陵体育	300651.SZ	3.98646	0.374569	0.443885	-0.786216	1.8	0.097132	0.304792	1.87276	1.84388	20.3866	1	0	0.925191	-0.375901	0.292676	0.393229	0.251026	0	0.683133	0.74995	-3.75391	5.21676
31	C24	2016	金陵体育	300651.SZ	4.01571	0.396321	0.334183	-0.786216	1.825	0.0979523	0.261457	1.78027	1.96166	20.4721	3	0	0.784346	0.010027	0.292094	0.393575	0.250675	0	1.11857	0.731141	-3.49824	4.75907
31	C24	2017	金陵体育	300651.SZ	4.22898	0.998547	0.650476	-0.867574	1.795	0.0829127	0.228064	1.8938	2.07944	20.5576	3	0	0.643501	0.395955	0.277149	0.392574	0.240961	0	1.554	3.02153	-6.5	12
31	C24	2018	金陵体育	300651.SZ	4.14811	0.74562	0.488359	-0.965876	1.765	0.0526283	0.341412	1.73283	2.19722	20.6431	3	0	0.502656	0.781883	0.296518	0.393088	0.245041	1	1.98943	1.84333	-5.93009	9.23941
31	C24	2019	金陵体育	300651.SZ	4.05905	0.485296	0.780359	-0.973069	1.965	0.0622423	0.35474	1.90274	2.19722	20.6103	3	0	0.472738	0.362927	0.246788	0.39216	0.24924	2	2.11534	2.02606	-5.73282	8.97644
31	C24	2020	金陵体育	300651.SZ	4.04311	0.478926	0.558554	-0.968133	1.71	0.0444017	0.323623	1.70308	1.79176	20.7035	3	0	0.266441	0.184011	0.291649	0.392866	0.249342	3	3.75317	1.81381	-4.79594	7.1813
31	C24	2021	金陵体育	300651.SZ	4.04587	0.445732	0.22983	-0.963027	1.705	0.0320563	0.2654	2.59023	1.79176	20.9487	2	0	0.438824	0.898	0.399633	0.393903	0.349878	4	2.27882	0.48493	-3.38163	4.53898
31	C24	2022	金陵体育	300651.SZ	4.04979	0.473446	0.72342	-0.969182	2.005	0.0416413	0.242689	2.9174	2.19722	20.9686	1	0	0.509845	0.076363	0.385307	0.410385	0.349431	5	1.96138	2.1218	-5.4352	8.40899
31	C24	2023	金陵体育	300651.SZ	4.12841	0.495363	0.660929	-0.996366	2.285	0.0643257	0.199893	3.47059	1.79176	20.9947	1	0	0.578142	0.345904	0.366911	0.410551	0.349077	6	1.72968	1.85184	-5.50214	8.64391
32	I64	2015	盛天网络	300494.SZ	4.0457	0.145696	0.716501	-0.902733	7.085	0.160724	0.062888	12.5287	2.30259	20.5712	1	0	0.595779	0.576966	0.072999	0.40103	0.213198	0	1.67847	1.41599	-4.02602	6.05685
32	I64	2016	盛天网络	300494.SZ	4.00028	0.0701222	0.79699	-0.977958	5.695	0.159349	0.053394	17.6025	2.30259	20.6769	1	0	0.364388	-0.035916	0.051054	0.400928	0.213727	1	2.74433	1.54131	-3.89749	5.81319
32	I64	2017	盛天网络	300494.SZ	4.18321	0.296874	0.774459	-0.966164	5.625	0.115639	0.047825	17.0045	2.3979	20.7352	2	0	0.449223	0.175675	0.052611	0.400957	0.212141	2	2.22607	1.71976	-5.26795	8.48727
32	I64	2018	盛天网络	300494.SZ	4.13225	0.214567	0.466275	-0.975445	5	0.0662353	0.043541	7.48962	1.94591	20.8319	1	0	0.669759	-0.108792	0.113152	0.401347	0.212717	3	1.49307	0.594336	-3.57864	5.28385
32	I64	2019	盛天网络	300494.SZ	4.08186	0.159632	0.705694	-0.998228	4.4	0.0641643	0.033091	3.09569	1.94591	21.1547	3	0	0.477932	0.288437	0.298293	0.401044	0.213101	4	2.09235	1.1572	-4.14295	6.32429
32	I64	2020	盛天网络	300494.SZ	4.0366	0.0723533	0.435556	-0.948965	4.39	0.071069	0.032083	2.95766	2.07944	21.1515	1	0	0.488181	-0.019285	0.273105	0.401386	0.213711	5	2.04842	0.583298	-2.59724	3.4073
32	I64	2021	盛天网络	300494.SZ	4.09563	0.0689701	0.421098	-0.9114	2.975	0.0946507	0.027482	3.28247	1.94591	21.3666	1	0	0.412222	-0.231761	0.314554	0.356587	0.213735	6	2.42588	0.674528	-2.69127	3.68627
32	I64	2022	盛天网络	300494.SZ	4.03708	0.100915	0.491558	-1.02254	2.175	0.1482	0.024618	3.51955	1.60944	21.4454	3	0	0.512654	0.055849	0.251845	0.356448	0.113511	7	1.95063	0.483237	-2.93666	4.02293
32	I64	2023	盛天网络	300494.SZ	4.01596	0.0752054	0.65279	-1.00397	4.07	0.111943	0.023345	5.2385	1.60944	21.4125	3	0	0.289387	-0.089059	0.138933	0.381128	0.113691	8	3.45558	0.620141	-3.39959	4.89064
33	I65	2015	盛讯达	300518.SZ	4.00111	0.62622	0.61335	-0.953586	15.58	0.188899	0.019946	13.9161	1.6946	20.5691	1	0	0.203184	-0.814258	0.065275	0.39488	0.281238	0	3.95609	2.58221	-5.50875	8.31666
33	I65	2016	盛讯达	300518.SZ	4.06537	0.62622	0.675272	-0.966227	14.335	0.150712	0.023841	17.6025	1.94591	20.8415	2	0	0.320511	-0.220357	0.06843	0.394655	0.281238	0	3.12002	2.00657	-5.92964	9.22024
33	I65	2017	盛讯达	300518.SZ	4.23846	0.523598	0.495506	-0.978868	10.4	0.0628363	0.072038	3.56244	2.19722	21.1138	2	0	0.437838	0.681087	0.258192	0.395308	0.283174	1	2.28395	1.75071	-5.28133	8.37925
33	I65	2018	盛讯达	300518.SZ	4.10561	0.551723	0.634594	-1.01086	5.55	0.0162067	0.185696	1.50985	2.07944	21.2958	3	0	0.78235	0.029375	0.333437	0.394803	0.282643	2	1.2782	2.1177	-5.57146	8.68178
33	I65	2019	盛讯达	300518.SZ	3.98506	0.343829	0.637517	-0.964675	5.46	-0.187982	0.073132	1.34841	1.94591	21.0157	1	0	0.532797	-0.240376	0.460396	0.394792	0.286566	3	1.87689	1.51382	-4.37729	6.42604
33	I65	2020	盛讯达	300518.SZ	4.04094	0.230138	0.519905	-0.928529	4.605	0.165084	0.065125	1.64862	2.07944	21.0228	1	0	0.486567	-0.510254	0.341477	0.39522	0.288711	4	2.05522	1.2462	-3.59852	5.15535
33	I65	2021	盛讯达	300518.SZ	4.14949	0.712234	0.527237	-1.00924	1.96	0.244559	0.045877	2.0874	1.94591	21.261	3	0	0.359352	0.153783	0.282702	0.395193	0.379615	5	2.78279	2.15353	-5.94605	9.30497
33	I65	2022	盛讯达	300518.SZ	4.13532	0.71242	0.629972	-1.00835	1.645	0.114405	0.03975	3.66263	2.63906	21.3907	3	0	0.321108	0.168945	0.143982	0.39482	0.379611	6	3.11422	2.52387	-6.30835	9.96789
33	I65	2023	盛讯达	300518.SZ	4.02907	0.636876	0.637517	-0.906508	1.33	-0.186072	0.033623	5.23786	2.07944	21.2124	3	0	0.282864	0.184107	0.005262	0.398579	0.281037	7	3.44565	2.40341	-5.72561	8.76316
34	C37	2015	林海股份	600099.SH	3.97265	0.0396654	0.456581	-0.889942	0.53	0.00548233	0.229508	3.59907	2.07944	20.1801	3	1	0.180536	0.115839	0.18641	0.386119	0.101911	18	5.53907	0.190853	-2.3643	2.89273
34	C37	2016	林海股份	600099.SH	3.98265	0.0374159	0.489351	-0.943501	0.5	0.00439233	0.218663	3.48883	2.07944	20.1969	1	1	0.138528	0.297837	0.197143	0.386008	0.101947	19	7.21874	0.0281625	-2.51069	3.18885
34	C37	2017	林海股份	600099.SH	4.21579	0.239654	0.71001	-0.858394	1.09	0.00451667	0.249585	4.40213	2.56495	20.136	1	1	0.250936	0.252512	0.15336	0.385255	0.0986853	20	3.98508	1.57505	-4.8679	7.83975
34	C37	2018	林海股份	600099.SH	4.18726	0.195846	0.718981	-0.876651	0.665	0.00611167	0.225985	3.50888	2.3979	20.1971	2	1	0.43446	0.441381	0.199092	0.385224	0.0993919	21	2.30171	1.46772	-4.64014	7.40449
34	C37	2019	林海股份	600099.SH	4.05488	0.0745693	0.457968	-0.947836	0.585	0.012766	0.207146	3.38013	2.19722	20.2365	2	1	0.387726	0.13578	0.211938	0.386114	0.101348	22	2.57914	0.607676	-2.74497	3.71519
34	C37	2020	林海股份	600099.SH	4.0547	0.0796326	0.647377	-0.882972	0.615	0.0172613	0.209282	4.08693	2.63906	20.1885	3	1	0.404006	0.071363	0.174797	0.385469	0.101266	23	2.47521	0.517408	-3.50501	5.14999
34	C37	2021	林海股份	600099.SH	4.0171	0.0693321	0.641458	-0.880755	0.77	0.0195523	0.12827	2.72201	2.19722	20.3489	1	1	0.335263	0.781783	0.284033	0.404697	0.101432	24	2.98273	0.2256	-3.33399	4.77406
34	C37	2022	林海股份	600099.SH	3.96869	0.0596321	0.617275	-0.9534	1.385	0.0168143	0.111296	2.23827	2.19722	20.4623	2	1	0.352864	0.26484	0.347892	0.404765	0.501589	25	2.83395	0.432527	-3.06403	4.19223
34	C37	2023	林海股份	600099.SH	4.06753	0.0888511	0.843952	-0.974816	1.815	0.0216933	0.116694	2.06121	2.56495	20.5577	1	1	0.328822	0.032433	0.398498	0.420316	0.601118	26	3.04116	1.52007	-4.34665	6.75671
35	K70	2015	中体产业	600158.SH	3.95615	0.132675	0.444694	-0.968602	0.54	0.02495	0.02886	1.97156	2.30259	22.0836	2	1	0.198591	2.1822	0.532481	0.39431	0.309162	17	5.03547	0.0194552	-2.66089	3.33533
35	K70	2016	中体产业	600158.SH	3.96764	0.12183	0.59737	-1.01855	0.425	0.021826	0.029079	2.10195	2.56495	22.0101	1	1	0.204916	0.931389	0.487337	0.392554	0.3098	18	4.88006	1.05125	-3.24355	4.46905
35	K70	2017	中体产业	600158.SH	4.14355	0.0543362	0.239074	-1.02781	0.31	0.0164557	0.022566	1.8796	2.19722	22.0727	2	1	0.422913	0.458948	0.501245	0.396628	0.31377	19	2.36456	0.0562225	-2.05314	2.57079
35	K70	2018	中体产业	600158.SH	4.08179	0.0320728	0.479592	-1.03664	0.195	0.0297217	0.018284	1.5983	2.30259	22.1717	2	1	0.497156	2.94333	0.535713	0.393912	0.31508	20	2.01144	0.272036	-2.72667	3.76704
35	K70	2019	中体产业	600158.SH	4.05806	0.113613	0.589724	-1.01149	0.08	0.0374283	0.014444	1.84073	2.19722	22.106	1	1	0.443009	2.94333	0.490238	0.392643	0.310283	21	2.25729	0.356888	-3.43143	4.98244
35	K70	2020	中体产业	600158.SH	4.03296	0.15211	0.79709	-1.04808	3.165	0.0342403	0.045054	2.67397	2.48491	22.3992	2	1	0.496372	2.44577	0.349381	0.390208	0.308019	22	2.01462	1.54093	-4.33191	6.60905
35	K70	2021	中体产业	600158.SH	4.04996	0.27158	0.67751	-1.01186	1.66	0.0223137	0.051468	2.95605	2.19722	22.4418	2	1	0.413348	1.96842	0.365125	0.391619	0.300991	23	2.41927	1.63202	-4.41218	6.67086
35	K70	2022	中体产业	600158.SH	4.0181	0.0612542	0.378338	-1.08116	2.35	0.0117717	0.031525	1.63053	2.30259	22.7008	3	1	0.667053	0.733063	0.532345	0.395064	0.113363	24	1.49913	0.0436091	-2.27591	2.77892
35	K70	2023	中体产业	600158.SH	4.04791	0.060093	0.466577	-1.102	0.92	0.0666867	0.04539	1.93356	2.19722	22.6168	2	1	0.635224	2.94333	0.45052	0.39406	0.113432	25	1.57425	0.207512	-2.69861	3.6302
36	I64	2015	国旅联合	600358.SH	4.02233	0.370432	0.388427	-0.85317	0.41	0.0234783	0.548348	1.3065	2.77259	20.4118	2	0	0.094365	7.7254	0.432996	0.401446	0.211627	15	10.5971	0.757825	-3.62015	5.02664
36	I64	2016	国旅联合	600358.SH	4.02254	0.287301	0.785277	-0.866772	0.22	-0.257669	0.423507	1.9857	2.3979	20.6333	2	0	0.189421	0.481174	0.288744	0.417616	0.212208	16	5.27926	1.73701	-4.82214	7.3868
36	I64	2017	国旅联合	600358.SH	4.2103	0.222136	0.739187	-0.937186	0.03	0.0801883	0.033793	2.34873	2.19722	20.5904	1	0	0.276373	0.583276	0.279354	0.417666	0.212664	17	3.6183	1.53734	-4.89322	7.89599
36	I64	2018	国旅联合	600358.SH	4.1679	0.19112	0.615874	-0.8814	0.16	-0.10884	0.036007	1.47537	2.30259	20.4417	3	0	0.416892	-0.154552	0.440634	0.417798	0.212881	18	2.3987	0.606108	-4.16393	6.47491
36	I64	2019	国旅联合	600358.SH	4.08431	0.513049	0.276266	-0.878284	0.35	-0.39689	0.043969	1.14109	2.56495	20.1412	1	1	0.236052	-0.193763	0.652274	0.381709	0.210629	19	4.23636	1.23149	-3.95161	5.61573
36	I64	2020	国旅联合	600358.SH	4.08893	0.5929	0.169422	-0.889066	0.54	0.0505903	0.032287	1.11488	2.30259	20.0556	1	1	0.226624	-0.255705	0.614286	0.381873	0.210071	20	4.42026	1.12197	-3.8814	5.41123
36	I64	2021	国旅联合	600358.SH	4.03556	0.505799	0.466606	-0.845649	0.14	0.0507643	0.020605	1.06131	2.30259	20.1519	1	1	0.217195	0.012432	0.66863	0.381416	0.31068	21	4.60416	1.34211	-4.52835	6.63519
36	I64	2022	国旅联合	600358.SH	4.07292	0.514475	0.517486	-0.874278	0.205	-0.004253	0.083577	1.00774	2.48491	19.9784	3	1	0.126083	0.280569	0.722974	0.401282	0.310619	22	7.9313	1.50231	-4.86742	7.33074
36	I64	2023	国旅联合	600358.SH	4.10447	0.601784	0.388464	-0.886889	0.21	-0.0320523	0.070148	0.954166	1.94591	20.0927	3	1	0.177322	0.548706	0.777318	0.401445	0.410009	23	5.63947	1.7009	-4.81689	7.20059
37	C37	2015	上海凤凰	600679.SH	4.01173	0.1591	0.551324	-0.92582	0.26	0	0.072333	1.1607	1.94591	21.2413	3	1	0.054464	-0.186405	0.255227	0.385797	0.0999846	22	6.92658	1.28205	-3.3426	4.69258
37	C37	2016	上海凤凰	600679.SH	4.00228	0.122979	0.543538	-0.934079	1.355	0.0458757	0.070864	1.40414	2.56495	21.2872	2	1	0.205532	-0.001216	0.259048	0.385823	0.100567	23	4.86543	0.914444	-3.1348	4.31904
37	C37	2017	上海凤凰	600679.SH	4.11766	0.0761154	0.491558	-0.961444	0.41	0.0716153	0.069395	1.64758	2.30259	21.3647	3	1	0.3566	0.183973	0.262869	0.386	0.101323	24	2.80427	0.839805	-3.0576	4.40967
37	C37	2018	上海凤凰	600679.SH	4.1761	0.0609958	0.0371206	-0.901045	0.43	0.00371767	0.073303	1.92908	2.19722	21.2888	1	1	0.529715	-0.437369	0.204886	0.387533	0.101567	25	1.88781	0.0433965	-1.38342	1.5
37	C37	2019	上海凤凰	600679.SH	4.09458	0.0395754	0.101685	-0.94178	0.38	0.0299873	0.068203	2.13506	2.19722	21.3276	2	1	0.486587	-0.00703	0.207115	0.387316	0.101912	26	2.05513	0.273688	-1.31856	1.5
37	C37	2020	上海凤凰	600679.SH	4.0976	0.0372532	0.130291	-1.02365	0.535	0.0609927	0.050868	1.74629	2.3979	21.7089	3	1	0.562003	-0.159446	0.281869	0.38722	0.10195	27	1.77935	0.393994	-1.42895	1.5
37	C37	2021	上海凤凰	600679.SH	4.01672	0.117304	0.289101	-1.01919	0.54	0.0422857	0.042441	2.17919	2.19722	21.9693	2	1	0.735218	-0.001991	0.287105	0.386686	0.200659	28	1.36014	0.494188	-2.15814	2.49798
37	C37	2022	上海凤凰	600679.SH	4.02501	0.0490191	0.639726	-0.950058	0.635	-0.129985	0.102438	2.01471	2.70805	21.8276	1	1	0.736479	0.506814	0.295326	0.420807	0.20176	28	1.35781	0.718867	-3.26432	4.67522
37	C37	2023	上海凤凰	600679.SH	4.11841	0.333983	0.751852	-0.959932	0.535	0.018621	0.086181	1.72201	2.48491	21.9043	3	1	0.684496	0.088854	0.333361	0.420537	0.297164	28	1.46093	2.15959	-5.15422	8.12802
38	C32	2015	宁波富邦	600768.SH	3.97164	0.21936	0.642164	-0.878169	15.77	-0.108604	0.353382	0.56528	2.19722	20.226	2	0	0.161813	-0.20897	0.924247	0.396434	0.380927	19	6.17998	1.27697	-3.83745	5.50434
38	C32	2016	宁波富邦	600768.SH	3.97609	0.0517466	0.745892	-0.881181	9.5	0.0360087	0.269665	0.72872	2.19722	20.3968	3	0	0.200543	0.199193	0.910752	0.393942	0.101879	20	5.17966	1.03839	-3.55374	5.14013
38	C32	2017	宁波富邦	600768.SH	4.19047	0.0748503	0.520372	-0.865031	0.09	0.149813	0.285571	0.83765	2.3979	20.1715	1	0	0.239273	0.097477	0.765521	0.399283	0.0989911	21	4.17933	0.196522	-3.36779	5.11886
38	C32	2018	宁波富邦	600768.SH	4.07457	0.0639961	0.385876	-0.867738	9.32	-0.0668667	0.2191	0.77031	2.30259	20.2867	3	0	0.353354	-0.032272	0.837113	0.402337	0.100348	22	2.83002	0.554293	-2.47425	3.24525
38	C32	2019	宁波富邦	600768.SH	4.05456	0.253638	0.722245	-0.837109	9.32	0.358109	0.006116	3.25288	2.30259	19.5282	1	0	0.176359	-0.325633	0.257606	0.412203	0.0766426	23	5.67026	1.53288	-4.5246	6.90925
38	C32	2020	宁波富邦	600768.SH	4.0226	0.160417	0.479403	-0.86501	9.32	0.00530933	0.009921	1.66326	2.70805	19.8122	1	0	0.307496	-0.166831	0.338314	0.400223	0.0882953	24	3.25208	0.884204	-3.09769	4.2452
38	C32	2021	宁波富邦	600768.SH	4.03189	0.0161829	0.124932	-0.831895	9.32	0.009146	0.004146	2.63672	2.3979	19.6061	2	0	0.238574	-0.121477	0.324675	0.408009	0.106325	25	4.19158	0.738923	-1.13668	1.5
38	C32	2022	宁波富邦	600768.SH	4.03019	0.00721371	0.579269	-0.866978	9.32	0.36285	0.012776	2.50004	2.19722	20.1431	1	0	0.400873	0.249604	0.298841	0.397915	0.107446	26	2.49456	0.424872	-2.86792	3.97411
38	C32	2023	宁波富邦	600768.SH	4.02569	0.0193748	0.656857	-0.881863	9.32	0.036688	0.011754	2.50525	2.3979	20.1775	2	0	0.329937	0.380243	0.295391	0.396085	0.105926	27	3.03088	0.55645	-3.20912	4.60114
39	C37	2015	中路股份	600818.SH	3.95333	0.413845	0.625321	-0.98019	1.585	0.065727	0.132647	0.876026	1.60944	20.6666	2	0	0.06007	-0.012539	0.421612	0.385545	0.0958758	21	16.6472	1.57775	-4.53404	6.60131
39	C37	2016	中路股份	600818.SH	4.01889	0.0376746	0.61896	-0.911558	2.38	0.113515	0.103888	1.33214	1.79176	20.7331	3	0	0.105641	-0.054714	0.364945	0.385566	0.101943	22	9.46601	0.576197	-3.11874	4.40052
39	C37	2017	中路股份	600818.SH	4.2181	0.148191	0.244823	-0.88186	2.075	0.028819	0.088244	0.863775	1.79176	20.7762	2	0	0.206878	-0.223926	0.346101	0.386835	0.100161	23	6.35577	0.573613	-2.67596	3.78097
39	C37	2018	中路股份	600818.SH	4.10445	0.220185	0.677745	-0.952222	2.875	-0.00586533	0.07804	1.17268	1.94591	20.7546	1	0	0.308116	-0.235911	0.377145	0.385366	0.0989993	24	3.24553	1.26428	-4.35009	6.69409
39	C37	2019	中路股份	600818.SH	4.04125	0.159128	0.537575	-0.904068	2.655	-0.10531	0.079098	0.453178	1.79176	20.6366	2	0	0.259427	-0.164584	0.363094	0.385844	0.0999841	25	3.85465	0.868116	-3.37137	4.7958
39	C37	2020	中路股份	600818.SH	4.02634	0.115045	0.214706	-0.907884	1.865	0.118248	0.064335	0.862394	1.79176	20.6766	3	0	0.392157	-0.353462	0.318799	0.332906	0.100695	26	2.55	0.191081	-1.88512	1.9988
39	C37	2021	中路股份	600818.SH	4.04355	0.173404	0.559706	-0.937967	2.445	0.0341877	0.075093	1.53909	1.94591	20.651	1	0	0.364606	-0.135758	0.262103	0.385768	0.0997539	27	2.74268	1.01842	-3.52388	5.07444
39	C37	2022	中路股份	600818.SH	4.06096	0.114517	0.500561	-0.91286	1.415	-0.125321	0.071059	1.89782	1.79176	20.64	3	0	0.126391	-0.288606	0.368713	0.38597	0.100704	28	7.91195	1.2012	-3.09525	4.34934
39	C37	2023	中路股份	600818.SH	4.01792	0.133886	0.123947	-0.901027	0.9	0.0293823	0.063883	1.64333	2.07944	20.6021	2	0	0.257698	-0.113508	0.361624	0.363912	0.0703913	28	3.8805	0.702341	-1.58617	1.5
40	I65	2015	大晟文化	600892.SH	3.90291	0.00855787	0.394123	-0.914226	2.51	0	0.004921	1.00423	2.19722	21.7229	2	0	1.10078	2.94333	0.361244	0.347466	0.00289161	19	0.830279	0.162905	-1.79595	1.73155
40	I65	2016	大晟文化	600892.SH	3.90811	0.338674	0.692487	-1.2367	3.28	0.0786667	0.004073	1.34387	2.3979	21.6387	3	0	0.878889	2.94333	0.322323	0.412267	0.286663	20	0.745892	1.69925	-4.35575	6.26329
40	I65	2017	大晟文化	600892.SH	4.08036	0.227475	0.410175	-0.935481	7.485	0.150247	0.003225	1.68352	2.30259	21.7501	2	0	0.657003	1.05233	0.283402	0.395617	0.288761	21	1.52206	0.759676	-3.26894	4.5986
40	I65	2018	大晟文化	600892.SH	4.07241	0.334237	0.243664	-0.894951	15.77	-0.528818	0.002381	2.45021	2.30259	21.0262	1	0	0.435117	0.553194	0.353589	0.311666	0.286747	22	2.29823	0.714272	-3.04332	4.05222
40	I65	2019	大晟文化	600892.SH	4.05672	0.314347	0.646001	-0.881566	15.595	-0.528818	0.00323	1.2288	2.19722	20.2975	3	0	0.187916	0.000929	0.584346	0.394762	0.287122	23	5.32153	1.32494	-4.48691	6.78127
40	I65	2020	大晟文化	600892.SH	4.01926	0.174346	0.467303	-0.918362	10.59	0.064098	0.0050075	0.812671	2.48491	20.1799	3	0	0.311792	0.173582	0.600147	0.39541	0.289764	24	3.20727	0.766559	-3.0994	4.22912
40	I65	2021	大晟文化	600892.SH	4.03611	0.034344	0.387926	-0.816392	15.81	-0.290042	0.006785	0.739731	2.19722	19.9406	2	0	0.173408	0.121783	0.458899	0.395697	0.292405	25	5.76675	0.443104	-2.251	2.78812
40	I65	2022	大晟文化	600892.SH	4.06133	0.0547979	0.435804	-0.866124	15.77	0.0880043	0.007544	1.00852	2.19722	19.7606	3	0	0.122066	0.111982	0.461705	0.395524	0.292019	26	8.19228	0.444596	-2.59376	3.45893
40	I65	2023	大晟文化	600892.SH	3.97741	0.0363702	0.590098	-0.841087	16.18	-0.116367	0.007876	1.2773	2.30259	19.5492	1	0	0.08723	0.102181	0.464511	0.394965	0.292367	27	11.4639	0.876846	-2.88496	3.89039
41	C35	2015	大丰实业	603081.SH	3.90941	0.215988	0.376335	-0.964934	1.95	0.0947917	0.133812	1.3001	1.79588	21.3583	2	0	0.402572	0.531563	0.579058	0.407981	0.309895	0	1.92495	0.544416	-2.61216	3.08332
41	C35	2016	大丰实业	603081.SH	3.90954	0.23356	0.663903	-0.981869	1.375	0.108038	0.13549	1.48174	1.99655	21.5435	1	0	0.552376	0.522056	0.540029	0.405079	0.308862	0	1.67454	1.13723	-3.80853	5.33294
41	C35	2017	大丰实业	603081.SH	3.92032	0.301956	0.801887	-0.998804	1.325	0.126647	0.08573	1.95635	2.19722	21.7287	1	0	0.70218	0.512549	0.43823	0.403656	0.304838	0	1.42414	1.49216	-4.66328	6.90253
41	C35	2018	大丰实业	603081.SH	4.0364	0.323562	0.61943	-1.01574	1.95	0.0995757	0.092802	1.71397	2.3979	21.9139	3	0	0.851984	0.503042	0.477411	0.405533	0.303567	1	1.17373	0.944112	-4.36506	6.50771
41	C35	2019	大丰实业	603081.SH	4.00469	0.249221	0.717288	-1.04253	1.815	0.079828	0.071562	1.94293	2.3979	22.1901	1	0	0.832642	0.434473	0.527351	0.40453	0.30794	2	1.201	1.40788	-4.34774	6.49619
41	C35	2020	大丰实业	603081.SH	4.03739	0.274766	0.480881	-1.04068	2.25	0.0859947	0.049352	1.7496	2.19722	22.3639	2	0	0.716811	0.668778	0.549941	0.406935	0.306438	3	1.39507	0.521905	-3.62294	5.15156
41	C35	2021	大丰实业	603081.SH	4.00994	0.410693	0.285542	-1.02865	2.105	0.0803807	0.039202	1.61526	2.19722	22.6859	3	0	0.712896	0.836728	0.626689	0.40888	0.298442	4	1.40273	1.02922	-3.35238	4.45896
41	C35	2022	大丰实业	603081.SH	4.03569	0.42763	0.653112	-1.03998	2.265	0.049647	0.035322	1.44851	2.19722	22.7591	1	0	0.778503	0.53437	0.622005	0.421222	0.297446	5	1.28452	1.59213	-4.92981	7.4735
41	C35	2023	大丰实业	603081.SH	4.08471	0.41985	0.428522	-1.04401	2.885	0.016441	0.071422	1.29666	2.56495	22.7901	2	0	0.751613	-0.592801	0.627264	0.42316	0.297903	6	1.33047	0.910878	-4.15727	6.09838
42	N78	2015	长白山	603099.SH	3.9342	0.326987	0.394563	-0.96872	9.491	0.152571	0.204837	11.4065	2.07944	20.6239	1	1	0.30311	-0.814258	0.050288	0.394187	0.422348	1	3.29913	1.1798	-3.21667	4.15968
42	N78	2016	长白山	603099.SH	3.93442	0.326987	0.627712	-0.970405	11.054	0.0916517	0.556169	1.20816	2.48491	20.8321	3	1	0.40044	-0.814258	0.191775	0.388363	0.422348	2	2.49725	1.15231	-4.1274	5.88565
42	N78	2017	长白山	603099.SH	3.97933	0.515987	0.485801	-0.962928	0.0535	0.0842077	0.556169	1.63211	2.48491	20.8406	3	1	0.333509	-0.701622	0.154926	0.391948	0.398723	3	2.99842	1.39627	-4.48911	6.45794
42	N78	2018	长白山	603099.SH	4.05703	0.365963	0.752748	-0.981287	7.846	0.0743927	0.556169	1.60796	2.30259	20.9591	2	1	0.488105	-0.707952	0.201323	0.385094	0.417476	4	2.04874	1.7567	-5.12034	7.93083
42	N78	2019	长白山	603099.SH	3.99105	0.442722	0.399118	-0.977083	4.019	0.077371	0.522896	2.65499	1.94591	20.9976	1	1	0.456149	-0.681452	0.177588	0.394076	0.407881	5	2.19226	1.27446	-3.87701	5.39007
42	N78	2020	长白山	603099.SH	3.94164	0.420829	0.424881	-0.882706	6.599	-0.059597	0.553757	2.5061	1.94591	20.9124	1	1	0.525178	-0.335366	0.158206	0.393448	0.410618	6	1.90412	1.28306	-3.74823	5.08619
42	N78	2021	长白山	603099.SH	3.96611	0.53941	0.276081	-0.912465	5.091	-0.0601323	0.553681	3.33301	1.79176	20.8249	3	1	0.361289	-0.687256	0.127726	0.397021	0.395795	7	2.76787	1.42495	-3.73157	4.97756
42	N78	2022	长白山	603099.SH	3.96093	0.45828	0.405544	-0.92505	4.319	-0.0705843	0.556169	1.84598	2.48491	20.7912	3	1	0.349754	-0.745759	0.153312	0.411704	0.405936	8	2.85915	0.748945	-3.88318	5.33663
42	N78	2023	长白山	603099.SH	3.94171	0.308606	0.749293	-1.07317	3.3965	0.157294	0.512723	2.52032	2.30259	20.9319	3	1	0.294193	-0.627037	0.156496	0.420589	0.424646	9	3.39913	1.39394	-4.54544	6.70798
43	C37	2015	春风动力	603129.SH	3.95784	0.294991	0.657623	-0.955186	2.4	0.062929	0.263266	1.15491	2.19722	20.8165	1	0	0.572521	-0.003992	0.647523	0.385434	0.0977928	0	1.64992	1.03282	-4.17563	6.04741
43	C37	2016	春风动力	603129.SH	3.95814	0.0720832	0.531289	-0.974013	3.03	0.0917967	0.215249	1.21273	2.19722	21.03	1	0	0.64481	0.002795	0.615732	0.385865	0.101388	0	1.52221	0.159938	-2.75104	3.56946
43	C37	2017	春风动力	603129.SH	4.01913	0.191323	0.373718	-0.99284	2.33	0.091702	0.123109	1.76268	2.19722	21.2434	1	0	0.717099	0.009582	0.465045	0.3864	0.0994648	0	1.39451	0.5182	-2.80472	3.65373
43	C37	2018	春风动力	603129.SH	4.13099	0.0125301	0.353804	-1.01167	3.195	0.0821173	0.10042	1.4384	2.19722	21.4569	1	0	0.789388	0.016369	0.51818	0.386467	0.102349	1	1.2668	0.0874261	-2.29113	3.04239
43	C37	2019	春风动力	603129.SH	4.09621	0.214441	0.792892	-1.03221	2.82	0.098163	0.102521	1.29113	2.07944	21.6544	1	0	0.528272	0.123071	0.577477	0.384971	0.099092	2	1.89296	1.43018	-4.75258	7.4488
43	C37	2020	春风动力	603129.SH	4.10438	0.147053	0.094915	-1.05572	2.61	0.133039	0.087075	1.20155	2.19722	22.1587	3	0	0.161329	0.01057	0.639127	0.387339	0.100179	3	6.19852	0.0246235	-1.76897	1.87584
43	C37	2021	春风动力	603129.SH	4.15723	0.00313211	0.155802	-1.06611	2.41	0.0848227	0.054141	1.5532	2.70805	22.799	2	0	0.285452	0.044227	0.53836	0.387135	0.1025	4	3.50322	0.820087	-1.55207	1.69469
43	C37	2022	春风动力	603129.SH	4.07192	0.00237903	0.468662	-1.09572	3.305	0.11026	0.10015	1.50863	2.19722	22.9802	3	0	0.431959	-0.262255	0.550453	0.331427	0.102512	5	2.31503	0.230632	-2.53232	3.41193
43	C37	2023	春风动力	603129.SH	4.04026	0.021222	0.0439305	-1.08472	3.815	0.140525	0.129383	1.59406	2.19722	23.0567	3	0	0.502517	-0.054467	0.498535	0.333888	0.102208	6	1.98998	0.841611	-0.864915	1.5
44	I64	2015	电魂网络	603258.SH	4.08042	0.209573	0.329079	-1.00651	12.805	0.344033	0.016675	2.20167	2.07944	21.2968	1	0	0.205006	-0.10676	0.357359	0.40152	0.212752	0	3.56734	0.678736	-2.87769	3.8751
44	I64	2016	电魂网络	603258.SH	4.08001	0.300574	0.201347	-0.998299	11.84	0.246277	0.010179	5.38705	2.07944	21.3349	2	0	0.365946	-0.070444	0.157835	0.401681	0.212115	0	2.73264	0.26075	-2.75855	3.55856
44	I64	2017	电魂网络	603258.SH	4.08386	0.406242	0.657363	-0.990086	12.225	0.113778	0.146119	4.70976	2.07944	21.373	3	0	0.526886	-0.034128	0.154843	0.401105	0.211376	1	1.89794	2.02672	-4.99127	7.69068
44	I64	2018	电魂网络	603258.SH	4.09492	0.259297	0.388176	-0.98968	10.745	0.0841003	0.125243	6.21855	2.07944	21.3816	3	0	0.624652	0.002187	0.112692	0.401446	0.212404	2	1.60089	0.767194	-3.35677	4.75752
44	I64	2019	电魂网络	603258.SH	4.02314	0.142644	0.483367	-1.03381	8.415	0.133295	0.088412	2.78917	1.94591	21.6434	2	0	0.401611	0.109877	0.231394	0.401326	0.21322	3	2.48997	0.890664	-3.04034	4.15503
44	I64	2020	电魂网络	603258.SH	4.04461	0.0381713	0.622414	-1.05503	8.105	0.194602	0.134918	2.78087	1.94591	21.8272	1	0	0.358628	0.097801	0.251082	0.40115	0.21395	4	2.7884	0.918397	-3.20604	4.60791
44	I64	2021	电魂网络	603258.SH	4.06641	0.00464737	0.708078	-0.98009	10.56	0.155381	0.101664	3.58773	2.19722	21.853	2	0	0.391267	-0.101775	0.187352	0.431975	0.214185	5	2.5558	0.403509	-3.46098	5.16014
44	I64	2022	电魂网络	603258.SH	4.00124	0.00108199	0.402757	-1.00978	12.005	0.0930903	0.093363	3.75628	1.94591	21.7856	2	0	0.495197	-0.059001	0.165626	0.432258	0.214209	6	2.0194	0.112127	-2.07257	2.42541
44	I64	2023	电魂网络	603258.SH	4.04067	0.0520505	0.734561	-1.01448	11.155	0.0266037	0.12851	3.89556	1.94591	21.7219	3	0	0.448255	-0.082217	0.158724	0.43195	0.213853	7	2.23088	0.633026	-3.69084	5.50623
45	I64	2015	吉比特	603444.SH	3.9649	0.087505	0.339335	-1.00335	8.1	0.309751	0.057989	4.30589	2.65926	21.5218	3	0	0.659773	0.143432	0.207509	0.401507	0.213605	0	1.39322	0.0608494	-2.08511	2.30356
45	I64	2016	吉比特	603444.SH	3.96481	0.00239957	0.731319	-1.01808	7.395	0.36285	0.01346	3.76005	2.30259	21.6952	1	0	0.600507	0.115229	0.223235	0.401012	0.2142	0	1.62041	1.11707	-3.25903	4.61202
45	I64	2017	吉比特	603444.SH	3.9649	0.131869	0.663628	-1.0328	8.47	0.331652	0.010087	4.03419	1.94591	21.8686	1	0	0.541241	0.087026	0.218647	0.401097	0.213295	0	1.8476	1.11665	-3.53652	5.00968
45	I64	2018	吉比特	603444.SH	3.9592	0.0720486	0.562159	-1.04753	8.675	0.333192	0.007558	3.10827	2.07944	22.1116	2	0	0.481975	0.294211	0.218831	0.401226	0.213713	1	2.0748	0.65413	-2.87437	3.80491
45	I64	2019	吉比特	603444.SH	3.95569	0.037814	0.647273	-1.06524	7.655	0.335911	0.225424	3.05461	2.07944	22.1978	2	0	0.295494	0.270015	0.213719	0.401118	0.213953	2	3.38416	0.07901	-3.05363	4.17268
45	I64	2020	吉比特	603444.SH	3.97149	0.00609775	0.719253	-1.0823	7.85	0.355334	0.160739	3.35066	1.94591	22.4074	2	0	0.169667	0.081626	0.211589	0.401027	0.214174	3	5.89388	0.832549	-3.246	4.59468
45	I64	2021	吉比特	603444.SH	4.01857	0.00103111	0.603895	-1.06319	6.59	0.36285	0.10124	2.38456	2.30259	22.6838	3	0	0.219509	0.032592	0.287706	0.417811	0.21421	4	4.55562	0.388616	-2.9058	4.03284
45	I64	2022	吉比特	603444.SH	4.0569	0.00202516	0.628661	-1.07686	6.51	0.36285	0.098468	2.11688	2.30259	22.5936	2	0	0.267496	0.013713	0.274392	0.417784	0.214203	5	3.73838	0.0686348	-3.11351	4.48869
45	I64	2023	吉比特	603444.SH	4.04475	0.0202517	0.689035	-1.06107	8.115	0.295989	0.089863	2.92571	1.94591	22.6159	2	0	0.348426	-0.083279	0.209313	0.431992	0.214075	6	2.87005	0.463787	-3.39151	4.97731
46	C17	2015	健盛集团	603558.SH	3.922	0.0141452	0.692065	-0.986599	0.465	0.12956	0.389397	1.11345	1.94591	20.9045	1	0	0.435611	-0.111311	0.353852	0.411063	0.0242732	0	2.29563	0.860344	-3.03556	4.10626
46	C17	2016	健盛集团	603558.SH	3.92106	0.00657185	0.637123	-1.00235	0.85	0.070756	0.232103	2.54226	1.94591	21.6221	3	0	0.633847	0.019489	0.250928	0.411408	0.0245645	1	1.74872	0.746129	-2.78679	3.64087
46	C17	2017	健盛集团	603558.SH	3.92511	0.0040286	0.677551	-1.03313	1.33	0.0591707	0.287485	2.5034	2.30259	21.9121	3	0	0.832083	0.253136	0.155071	0.411154	0.0246623	2	1.2018	0.793728	-2.94527	3.95036
46	C17	2018	健盛集团	603558.SH	3.9281	0.00499632	0.610641	-1.03716	1.285	0.0788173	0.333027	1.82348	2.07944	22.0098	1	0	0.751584	0.116891	0.203785	0.411575	0.0246251	3	1.33052	0.667381	-2.69646	3.48288
46	C17	2019	健盛集团	603558.SH	3.93001	0.00515935	0.544969	-1.02687	1.415	0.097947	0.361203	1.67447	2.07944	22.0484	2	0	0.740765	-0.033918	0.189662	0.411986	0.0246188	4	1.34996	0.523647	-2.44613	3.01159
46	C17	2020	健盛集团	603558.SH	3.92483	0.212541	0.431247	-0.938511	1.455	-0.201672	0.444087	1.81234	1.94591	21.9272	2	0	0.783735	0.022602	0.284369	0.412694	0.0166426	5	1.27594	0.942947	-2.8551	3.5725
46	C17	2021	健盛集团	603558.SH	3.92814	0.123063	0.677749	-1.03121	1.435	0.0599487	0.368731	1.27485	1.94591	22.0977	2	0	0.630744	-0.130903	0.414398	0.426324	0.020084	6	1.58543	1.14536	-3.45231	4.79815
46	C17	2022	健盛集团	603558.SH	4.03543	0.085493	0.734561	-1.03101	1.38	0.089122	0.402649	1.3412	1.94591	22.0817	1	0	0.856107	-0.047644	0.36046	0.426016	0.021529	7	1.16808	0.887062	-3.81611	5.70181
46	C17	2023	健盛集团	603558.SH	4.03749	0.0733383	0.738146	-1.03331	1.105	0.0991693	0.428553	1.45558	2.3979	21.9723	3	0	0.754129	0.130104	0.300393	0.425997	0.0219965	8	1.32603	0.578959	-3.785	5.65829
47	C18	2015	牧高笛	603908.SH	3.92652	0.0679874	0.585966	-0.940123	0.515	0.170649	0.104799	1.86773	2.30259	20.288	3	0	0.47793	0.126769	0.44604	0.399561	0.149312	0	2.02376	0.501393	-2.85918	3.72621
47	C18	2016	牧高笛	603908.SH	3.92646	0.141424	0.587186	-0.942281	0.59	0.138009	0.083585	1.8292	2.30259	20.2781	2	0	0.521227	0.046451	0.464669	0.399556	0.147927	0	1.89758	0.753765	-3.17093	4.24406
47	C18	2017	牧高笛	603908.SH	3.92652	0.359988	0.526701	-0.944439	0.61	0.12674	0.059154	3.05347	2.30259	20.2682	2	0	0.564524	-0.033867	0.297977	0.399766	0.143803	0	1.7714	1.52984	-3.84908	5.31256
47	C18	2018	牧高笛	603908.SH	3.92652	0.0302756	0.573718	-0.946597	0.84	0.0871093	0.058845	3.25775	2.30259	20.2583	1	0	0.607821	-0.114185	0.278508	0.399603	0.150024	1	1.64522	0.390169	-2.65366	3.37414
47	C18	2019	牧高笛	603908.SH	3.92608	0.206472	0.545345	-0.939192	0.73	0.0846817	0.050798	2.89216	2.19722	20.2935	1	0	0.606668	-0.24882	0.317655	0.399701	0.146699	2	1.64835	0.935746	-3.27859	4.38299
47	C18	2020	牧高笛	603908.SH	3.92662	0.0407897	0.49729	-0.953697	1.665	0.072225	0.033929	1.73233	2.56495	20.699	1	0	0.467459	-0.03111	0.549263	0.399868	0.149825	3	2.13923	0.085341	-2.39958	2.8825
47	C18	2021	牧高笛	603908.SH	3.92863	0.0327886	0.509574	-0.973342	1.375	0.0947953	0.032812	1.56099	2.30259	20.8942	2	0	0.340383	0.070334	0.60508	0.399825	0.149976	4	2.93787	0.345751	-2.41966	2.93177
47	C18	2022	牧高笛	603908.SH	3.9662	0.0379108	0.505718	-0.991426	1.26	0.146223	0.030201	1.51808	2.30259	21.0168	3	0	0.275623	-0.043497	0.601795	0.399839	0.14988	5	3.62814	0.17682	-2.53079	3.1993
47	C18	2023	牧高笛	603908.SH	4.07945	0.0345341	0.649976	-0.99994	0.96	0.110794	0.111681	1.54037	2.30259	20.9481	1	0	0.395446	0.018123	0.546986	0.416259	0.149943	6	2.52879	1.05948	-3.39554	5.02809
48	C18	2015	泰慕士	001234.SZ	3.93365	0.00158053	0.547245	-0.887314	1.29	-0.528818	0.225013	0.943074	1.60944	17.597	1	0	0.943074	-0.814258	0.143467	0.399695	0.150565	0	0.962314	0.39654	-2.45019	3.02884
48	C18	2016	泰慕士	001234.SZ	3.93357	0.00135474	0.573337	-0.899137	1.475	-0.528818	0.225013	0.913708	1.60944	17.597	1	0	0.913708	-0.814258	0.151773	0.399604	0.150569	0	1.01854	0.592755	-2.55088	3.2197
48	C18	2017	泰慕士	001234.SZ	3.93365	0.00112895	0.500339	-0.91096	1.66	-0.528818	0.225013	0.884342	1.60944	18.1349	3	0	0.884342	-0.814258	0.160079	0.399857	0.150574	0	1.07477	0.133171	-2.26521	2.67878
48	C18	2018	泰慕士	001234.SZ	3.93365	0.00090316	0.534689	-0.922783	1.845	-0.495689	0.225013	0.854976	1.60944	18.6728	3	0	0.854976	-0.814258	0.168385	0.399738	0.150578	0	1.131	0.6445	-2.39836	2.93129
48	C18	2019	泰慕士	001234.SZ	3.93365	0.00067737	0.657833	-0.934606	1.88	-0.370559	0.225013	0.82561	1.60944	19.2107	3	0	0.82561	-0.814258	0.176691	0.399311	0.150582	0	1.18723	0.87804	-2.8781	3.84051
48	C18	2020	泰慕士	001234.SZ	3.93357	0.00045158	0.711284	-0.946429	1.61	-0.245429	0.1759	0.796244	1.60944	19.7486	1	0	0.796244	-0.474537	0.184997	0.399125	0.150586	0	1.24345	0.609768	-3.08557	4.2337
48	C18	2021	泰慕士	001234.SZ	3.93652	0.00022579	0.594459	-0.958252	1.75	-0.120298	0.0307	0.766878	1.60944	20.2866	1	0	0.766878	-0.134816	0.193303	0.416422	0.150591	0	1.29968	0.904018	-2.63684	3.38856
48	C18	2022	泰慕士	001234.SZ	4.00221	0.00633995	0.696126	-0.970075	2.295	0.004832	0.1145	0.737512	1.60944	20.8245	1	0	0.737512	0.204905	0.201609	0.416124	0.150475	0	1.35591	0.937411	-3.2424	4.63834
48	C18	2023	泰慕士	001234.SZ	4.08722	0.00028439	0.731081	-0.981898	2.195	0.0121737	0.2597	0.708146	1.60944	20.8483	1	0	0.708146	0.224203	0.209915	0.430521	0.15059	1	1.41214	1.01343	-3.59056	5.44435
49	C24	2015	三柏硕	001300.SZ	4.23846	0.198038	0.720812	-1.2367	2.935	-0.037409	0.225013	10.7998	1.94591	21.3153	1	0	1.50796	1.52063	0.132331	0.39235	0.253873	0	0.23238	1.08786	-4.79922	7.78827
49	C24	2016	三柏硕	001300.SZ	4.0287	0.177416	0.604843	-1.2367	2.51	-0.0302633	0.0661331	10.2765	1.94591	21.264	1	0	1.38577	1.35495	0.132797	0.392719	0.254206	0	0.585295	1.02809	-3.67544	5.33312
49	C24	2017	三柏硕	001300.SZ	4.15595	0.156794	0.700339	-1.20314	2.085	-0.0231177	0.122513	9.75319	1.94591	21.2127	3	0	1.26359	1.18926	0.133263	0.392415	0.254538	0	0.765891	1.3476	-4.31676	6.77876
49	C24	2018	三柏硕	001300.SZ	4.06295	0.136172	0.622454	-1.1536	1.66	-0.015972	0.298679	9.22989	1.94591	21.1614	1	0	1.1414	1.02357	0.133729	0.392663	0.254871	0	0.120535	1.19104	-3.66719	5.41488
49	C24	2019	三柏硕	001300.SZ	4.06767	0.11555	0.258428	-1.10405	1.235	-0.00882633	0.182264	8.70659	1.94591	21.1101	1	0	1.01922	0.857887	0.134195	0.393813	0.255203	0	0.47345	0.0207996	-2.17314	2.61225
49	C24	2020	三柏硕	001300.SZ	4.14686	0.0949278	0.640387	-1.05451	1.415	-0.00168067	0.183767	8.18329	1.94591	21.0588	3	0	0.897031	0.692201	0.134661	0.392606	0.255536	0	0.826365	0.926211	-3.79864	5.84333
49	C24	2021	三柏硕	001300.SZ	4.06302	0.0743057	0.53084	-1.00497	1.46	0.005465	0.238064	7.65999	1.94591	21.0076	2	0	0.774845	0.526515	0.135127	0.371072	0.255869	0	1.17928	0.550036	-3.05102	4.30878
49	C24	2022	三柏硕	001300.SZ	4.0423	0.0536835	0.459416	-0.955421	2.08	0.0126107	0.285997	7.13669	1.94591	20.9563	3	0	0.652659	0.360829	0.135593	0.371354	0.256201	0	1.53219	0.658507	-2.62821	3.49389
49	C24	2023	三柏硕	001300.SZ	4.04844	0.0330614	0.593562	-0.905877	3.42	0.0197563	0.1197	6.61339	1.94591	20.905	2	0	0.530473	0.195143	0.136059	0.370825	0.256534	1	1.88511	0.564654	-3.08271	4.38562
50	I64	2015	惠程科技	002168.SZ	4.00511	0.229634	0.630688	-0.915168	3.055	0.012013	0.082	4.93336	1.94591	22.2733	1	0	0.155411	-0.072296	0.161355	0.401139	0.212611	8	6.43457	1.26209	-3.92893	5.72272
50	I64	2016	惠程科技	002168.SZ	3.99245	0.310026	0.692912	-0.940049	1.73	0.00549933	0.0513	1.42236	2.19722	22.4644	2	0	0.159102	0.064185	0.336846	0.40106	0.212049	9	6.28526	1.49656	-4.47276	6.65263
50	I64	2017	惠程科技	002168.SZ	4.06603	0.28278	0.622454	-0.945758	1.97	-0.083214	0.0311	0.72496	2.19722	22.599	1	0	0.259266	-0.106329	0.569138	0.40115	0.21224	10	3.85704	1.27868	-4.28892	6.45275
50	I64	2018	惠程科技	002168.SZ	4.0787	0.278834	0.592268	-1.09952	1.645	-0.072286	0.0256	1.50172	2.19722	22.5795	2	0	0.386652	-0.084046	0.451203	0.401188	0.212267	11	2.58631	1.48257	-4.18994	6.29004
50	I64	2019	惠程科技	002168.SZ	4.06518	0.335266	0.668416	-0.907181	3.54	0.0108857	0.0363	1.34705	1.94591	22.5153	2	0	0.285252	0.325246	0.713625	0.401091	0.211873	12	3.50568	1.77121	-4.68547	7.15073
50	I64	2020	惠程科技	002168.SZ	4.0623	0.433786	0.251512	-0.919662	3.635	0.0228493	0.1098	1.41767	2.19722	22.5962	3	0	0.332778	0.446206	0.71762	0.401618	0.211184	13	3.00501	0.731694	-3.46213	4.73046
50	I64	2021	惠程科技	002168.SZ	4.01785	0.244244	0.65204	-0.853084	6.17	0.0195713	0.1611	0.681739	2.19722	22.6834	2	1	0.226027	0.232354	0.859784	0.417759	0.212509	14	4.42426	1.50112	-4.10892	6.07034
50	I64	2022	惠程科技	002168.SZ	4.02859	0.210459	0.460182	-0.883415	7.15	0.0254993	0.1843	0.49605	2.19722	22.848	1	1	0.205389	0.274393	0.939703	0.417965	0.212745	15	4.8688	0.745856	-3.24864	4.49152
50	I64	2023	惠程科技	002168.SZ	4.15095	0.194796	0.715001	-0.903516	4.205	0.00736267	0.1215	0.576646	2.19722	22.7882	2	1	0.210657	0.406254	0.951259	0.417692	0.212855	16	4.74705	1.10752	-4.51898	7.11602
51	H62	2015	中科云网	002306.SZ	3.96064	0.229432	0.222332	-0.786216	0.67	0.0250727	0.0541	0.945767	1.79176	23.2655	3	0	1	0.526986	0.976365	0.401685	0.224582	6	2.52808	0.027808	-2.21009	2.39277
51	H62	2016	中科云网	002306.SZ	3.96691	0.671567	0.240006	-0.786216	0.665	0.036549	0.04885	0.698181	1.94591	23.4557	2	0	0.017067	-0.172423	0.976365	0.401286	0.169315	7	2.52808	1.13392	-4.1457	5.63263
51	H62	2017	中科云网	002306.SZ	4.0658	0.146442	0.434011	-0.786216	0.66	0.0421913	0.0436	0.921951	1.94591	23.6947	3	0	0.025208	-0.814258	0.976365	0.396802	0.234956	8	2.52808	0.270582	-2.98251	4.11211
51	H62	2018	中科云网	002306.SZ	4.06218	0.485541	0.43811	-0.8139	0.655	0.0232113	0.0441	1.01426	2.07944	23.8526	3	0	0.034818	-0.814258	0.976365	0.396705	0.192569	9	2.52808	1.39849	-4.40661	6.46855
51	H62	2019	中科云网	002306.SZ	4.03639	0.0707094	0.641611	-0.786216	0.65	0.0211577	0.1099	0.930413	2.07944	24.0402	1	0	0.04166	0.002374	0.823604	0.39177	0.244423	10	2.52808	0.842545	-3.39412	4.91847
51	H62	2020	中科云网	002306.SZ	4.09919	0.0135933	0.681618	-0.958791	0.645	0.011981	0.0388	1.09119	2.19722	24.3435	1	0	0.094803	-0.136519	0.670844	0.390771	0.251562	11	2.52808	0.487415	-3.4865	5.25376
51	H62	2021	中科云网	002306.SZ	4.10212	0.32165	0.599414	-0.786216	0.64	-0.107571	0.0153	1.6634	2.07944	24.3435	1	0	0.06645	-0.494212	0.518084	0.392814	0.213055	12	15.0488	1.46549	-4.46217	6.8021
51	H62	2022	中科云网	002306.SZ	4.02674	0.00325557	0.680608	-0.800932	0.635	0.0148933	0.012	1.26643	2.19722	24.3435	3	0	0.044389	-0.139092	0.674284	0.390796	0.252854	13	22.5281	0.821035	-3.23733	4.67228
51	H62	2023	中科云网	002306.SZ	4.07327	0.0839007	0.72668	-0.873452	0.145	0.014632	0.0353	0.231378	2.19722	24.3435	3	0	0.144007	-0.162528	0.804715	0.389633	0.242774	14	6.94412	1.03095	-3.88419	5.89486
52	I64	2015	凯撒文化	002425.SZ	4.0092	0.00657012	0.32476	-1.10387	1.25	0.0192053	0.0245	1.40634	2.19722	23.1487	2	0	0.226425	0.208302	0.200623	0.401526	0.214171	5	4.41648	0.0640244	-1.81323	1.94172
52	I64	2016	凯撒文化	002425.SZ	4.03542	0.133579	0.549317	-1.12134	2.4	0.023492	0.004	1.43391	2.07944	23.5118	2	0	0.562692	0.273819	0.177873	0.401242	0.213283	6	1.77717	0.502804	-3.2941	4.66509
52	I64	2017	凯撒文化	002425.SZ	4.15091	0.351446	0.62897	-1.08059	7.245	0.019962	0.0018	1.76179	2.19722	23.6112	1	0	0.686532	0.219921	0.196206	0.401141	0.211759	7	1.4566	1.66528	-4.83819	7.5656
52	I64	2018	凯撒文化	002425.SZ	4.09354	0.34235	0.611894	-1.02505	6.715	0.0162183	0.0015	1.60931	2.19722	23.606	1	0	0.847827	0.062435	0.182215	0.401163	0.211823	8	1.17949	1.7663	-4.57355	6.97847
52	I64	2019	凯撒文化	002425.SZ	4.03264	0.0549461	0.619431	-1.01605	6.785	0.0149653	0.0021	1.12857	2.19722	23.3405	3	0	0.923729	-0.097187	0.17871	0.401153	0.213833	9	1.08257	0.744254	-3.23115	4.6191
52	I64	2020	凯撒文化	002425.SZ	4.12026	0.0333694	0.597999	-0.998757	12.905	0.010664	0.0019	1.02476	2.19722	23.1381	1	0	0.682806	0.137805	0.166967	0.401181	0.213984	10	1.46455	0.785401	-3.30157	4.91858
52	I64	2021	凯撒文化	002425.SZ	4.12509	0.020358	0.536104	-0.962451	10.91	0.00439733	0.0016	2.81259	2.19722	22.9407	1	0	0.594721	0.233557	0.105128	0.401259	0.214075	11	1.68146	0.712975	-3.01901	4.40404
52	I64	2022	凯撒文化	002425.SZ	4.18076	0.0137074	0.652587	-0.994102	15.13	-0.016194	0.0017	2.26788	2.07944	22.8692	2	0	0.979479	0.152609	0.117135	0.401111	0.214121	12	1.02095	0.916173	-3.60109	5.60542
52	I64	2023	凯撒文化	002425.SZ	4.19105	0.0174467	0.736067	-0.991737	15.77	-0.0243793	0.0015	1.73361	2.19722	22.7392	1	0	0.853934	0.326596	0.133097	0.401006	0.214095	13	1.17105	0.869261	-3.97129	6.32016
53	R86	2015	鼎龙文化	002502.SZ	3.99531	0.0631246	0.309882	-0.975467	3.3	0.012285	0.0549	4.92706	2.19722	21.8463	3	0	1	-0.814258	0.175163	0.409589	0.146994	5	2.6618	0.021674	-1.95295	2.12751
53	R86	2016	鼎龙文化	002502.SZ	3.97823	0.31915	0.303965	-1.01767	3.24	0.0306317	0.0254	4.53442	2.19722	21.9269	1	0	0.462372	-0.814258	0.123189	0.409712	0.114991	6	2.16276	0.624628	-2.95302	3.74059
53	R86	2017	鼎龙文化	002502.SZ	4.04612	0.326398	0.603713	-1.01259	2.075	0.03288	0.0236	6.78699	2.19722	22.0075	3	0	0.601061	-0.814258	0.071215	0.403282	0.114085	7	1.66372	1.23893	-4.3427	6.47858
53	R86	2018	鼎龙文化	002502.SZ	4.12272	0.115593	0.668619	-0.943626	1.81	-0.172983	0.0248	5.10728	2.19722	22.0475	2	0	0.730769	-0.814258	0.115057	0.401834	0.140436	8	1.36842	0.822823	-3.92796	6.02803
53	R86	2019	鼎龙文化	002502.SZ	4.10969	0.215497	0.679032	-0.941579	0.965	-0.200806	0.0198	12.2396	1.94591	21.625	2	0	0.54761	-0.147906	0.055711	0.4016	0.127948	9	1.82612	0.918047	-4.35011	6.70742
53	R86	2020	鼎龙文化	002502.SZ	4.05687	0.0927658	0.687958	-0.947751	2.135	-0.228628	0.0148	13.053	2.19722	21.0567	1	0	0.834433	0.55796	0.136792	0.401398	0.143289	10	1.19842	0.73723	-3.72438	5.55619
53	R86	2021	鼎龙文化	002502.SZ	4.09368	0.0641414	0.556471	-0.941992	1.155	-0.256451	0.05	2.87266	2.19722	21.5271	2	0	0.583612	0.683712	0.217473	0.404324	0.146867	11	1.71347	0.463277	-3.19405	4.64047
53	R86	2022	鼎龙文化	002502.SZ	4.08346	0.035517	0.535753	-0.932876	1.325	-0.284274	0.1358	2.03692	2.19722	21.6585	1	0	0.648599	1.24221	0.253507	0.404777	0.150445	12	1.54178	0.685758	-2.96497	4.21791
53	R86	2023	鼎龙文化	002502.SZ	4.1124	0.00689258	0.771926	-0.967176	0.325	-0.312096	0.1401	1.80922	2.19722	21.5703	3	0	0.798959	0.109139	0.254413	0.399484	0.154023	13	1.25163	1.04767	-3.84782	5.96682
54	I64	2015	巨人网络	002558.SZ	3.99189	0.51124	0.473303	-0.874994	10.685	0.022079	0.556169	6.32142	1.94591	21.533	1	0	0.110236	-0.277757	0.059181	0.401338	0.210642	4	9.07141	1.2237	-4.45549	6.41966
54	I64	2016	巨人网络	002558.SZ	4.01205	0.485522	0.704012	-1.20367	10.75	0.0257343	0.0473	7.212	1.94591	22.8846	3	0	0.546004	-0.267313	0.123007	0.401046	0.210822	5	1.83149	2.22613	-5.30471	8.08747
54	I64	2017	巨人网络	002558.SZ	4.17702	0.161344	0.609904	-1.08668	10.815	0.023839	0.0384	3.92379	1.94591	23.2756	3	0	0.482017	0.006708	0.290235	0.401166	0.213089	6	2.07461	0.862207	-4.04152	6.28752
54	I64	2018	巨人网络	002558.SZ	4.11288	0.0631249	0.644129	-1.07563	10.425	0.0217987	0.0358	5.20663	1.94591	23.0918	1	0	0.626932	0.243975	0.149575	0.401122	0.213776	7	1.59507	0.288671	-3.58549	5.41486
54	I64	2019	巨人网络	002558.SZ	4.06113	0.0272466	0.716336	-1.06614	16.03	0.0217517	0.0344	3.22278	1.94591	23.0198	1	0	0.258618	0.217777	0.188672	0.401031	0.214027	8	3.86671	0.556368	-3.57303	5.34136
54	I64	2020	巨人网络	002558.SZ	4.05949	0.387573	0.50565	-1.08024	15.945	0.020208	0.0268	5.49227	1.94591	23.106	1	0	0.296069	0.283042	0.120961	0.401297	0.211507	9	3.37759	1.2934	-4.25302	6.27014
54	I64	2021	巨人网络	002558.SZ	4.04107	0.421837	0.585242	-1.03347	16.79	0.0141003	0.0225	4.97226	1.94591	23.2019	2	0	0.466519	0.308101	0.111539	0.401197	0.211267	10	2.14354	1.87461	-4.65565	6.96867
54	I64	2022	巨人网络	002558.SZ	3.99426	0.0320763	0.691274	-1.08299	15.765	0.0211307	0.0184	1.89684	1.94591	23.3042	3	0	0.764997	0.220478	0.098988	0.401062	0.213993	11	1.3072	0.266367	-3.30894	4.72578
54	I64	2023	巨人网络	002558.SZ	4.03135	0.0201809	0.525301	-1.10521	11.83	0.0224753	0.0183	1.48894	1.94591	23.3163	1	0	0.565975	0.225924	0.122552	0.401273	0.214076	12	1.76686	0.534574	-2.71473	3.67292
55	C24	2015	姚记科技	002605.SZ	3.97749	0.411394	0	-1.00257	1.43	-0.0278423	0.1307	1.71341	1.94591	21.0953	1	0	0.198712	-0.187317	0.268005	0.394622	0.250432	4	5.03241	0.106086	-2.15022	2.1269
55	C24	2016	姚记科技	002605.SZ	3.97046	0.129941	0	-0.924596	1.865	0.014064	0.114	2.00027	1.94591	21.4162	3	0	0.364339	-0.577546	0.227047	0.394622	0.254971	5	2.74469	0.400436	-0.953508	1.5
55	C24	2017	姚记科技	002605.SZ	4.07825	0.346626	0	-0.966492	2.3	0.0230013	0.1025	2.63236	1.94591	21.3907	2	0	0.450992	-0.441612	0.155648	0.394622	0.251476	6	2.21733	0.207814	-2.16029	2.37649
55	C24	2018	姚记科技	002605.SZ	4.07515	0.0937635	0	-1.02219	2.735	0.0159253	0.1422	0.818408	1.94591	21.7026	2	0	0.799781	-0.551503	0.292608	0.394622	0.255555	7	1.25034	0.555875	-1.09409	1.5
55	C24	2019	姚记科技	002605.SZ	4.08624	0.299664	0.459833	-1.06314	3.17	0.012898	0.124	0.860259	1.94591	21.8288	2	0	0.418733	2.94333	0.479907	0.393178	0.252234	8	2.38816	0.866314	-3.78111	5.50723
55	C24	2020	姚记科技	002605.SZ	4.02376	0.273	0.785721	-1.05917	2.685	0.008523	0.0861	1.13017	2.07944	22.0807	2	0	0.384451	2.94333	0.456029	0.392142	0.252664	9	2.60111	2.05007	-4.76747	7.29938
55	C24	2021	姚记科技	002605.SZ	4.09591	0.0603647	0.703209	-1.01166	2.87	0.00685367	0.098	1.03227	1.94591	22.1044	2	0	0.423103	-0.027793	0.38333	0.392406	0.256093	10	2.36349	0.58665	-3.75726	5.71505
55	C24	2022	姚记科技	002605.SZ	4.05326	0.0118409	0.764799	-1.04401	3.38	0.0350387	0.0896	1.13057	1.94591	22.2061	2	0	0.646915	-0.067352	0.380547	0.392209	0.256876	11	1.5458	1.33128	-3.67582	5.53839
55	C24	2023	姚记科技	002605.SZ	4.05518	0.0063559	0.733941	-1.04873	2.815	0.0354863	0.085	1.48386	1.94591	22.2758	1	0	0.499991	0.053589	0.311117	0.392308	0.256965	12	2.00003	0.672974	-3.53777	5.2854
56	R88	2015	力盛体育	002858.SZ	3.95084	0.00198852	0.382209	-0.887969	2.155	0.005336	0.2266	11.6033	2.19722	19.5667	3	0	0.527996	-0.058499	0.083344	0.385332	0.0423279	0	1.88406	0.326827	-1.85561	1.93023
56	R88	2016	力盛体育	002858.SZ	3.95074	0.00288855	0.384177	-0.911337	2.075	0.00791633	0.1903	8.82854	2.19722	19.7753	1	0	0.513487	0.015786	0.019944	0.385279	0.0422154	0	1.94408	0.00974325	-1.86677	1.9503
56	R88	2017	力盛体育	002858.SZ	3.95411	0.00239957	0.686749	-0.934705	2.565	0.0104967	0.154	6.05372	2.19722	19.9838	2	0	0.498978	0.090071	0.123232	0.376913	0.0422765	0	2.0041	0.893108	-3.05521	4.20815
56	R88	2018	力盛体育	002858.SZ	4.01271	0.00239957	0.427895	-0.958073	2.065	0.013077	0.1177	3.27891	2.19722	20.1923	1	0	0.484469	0.164356	0.22652	0.384113	0.0422765	1	2.06412	0.530284	-2.20817	2.69998
56	R88	2019	力盛体育	002858.SZ	3.99633	0.127211	0.456181	-0.913392	2.165	0.0259993	0.0814	2.27692	2.07944	20.4214	2	0	0.521638	0.344047	0.302673	0.383351	0.0266751	2	1.91704	0.648021	-2.79492	3.66104
56	R88	2020	力盛体育	002858.SZ	4.0559	0.0269692	0.25245	-0.89502	3.65	0.0197027	0.1732	1.89906	2.07944	20.2015	3	0	0.461044	0.013637	0.273391	0.388714	0.0392053	3	2.16899	0.258943	-1.74651	1.87222
56	R88	2021	力盛体育	002858.SZ	4.13747	0.0615505	0.564472	-0.913872	2.565	0.0209343	0.1035	2.04123	2.07944	20.8506	1	0	0.534972	0.048881	0.281908	0.380379	0.0348826	4	1.86926	0.664896	-3.33654	4.98533
56	R88	2022	力盛体育	002858.SZ	4.07401	0.0884696	0.407389	-0.915165	2.555	0.0183917	0.1158	1.91769	2.19722	20.7529	2	0	0.449306	-0.074213	0.255175	0.384662	0.0315177	5	2.22566	0.426433	-2.659	3.57012
56	R88	2023	力盛体育	002858.SZ	4.08687	0.0267352	0.592615	-0.922594	1.61	0.017847	0.1016	1.42911	2.19722	20.7503	1	0	0.321641	0.159174	0.326038	0.379592	0.0392345	6	3.10906	0.67615	-3.15971	4.60124
57	I65	2015	富春股份	300299.SZ	3.98346	0.188855	0	-1.01015	4.76	0.11315	0.0096	2.1176	2.19722	21.2042	2	0	0.200186	1.0063	0.177656	0.397087	0.28949	3	4.99536	0.596741	-1.23616	1.5
57	I65	2016	富春股份	300299.SZ	4.00331	0.399552	0	-0.999805	3.965	0.049552	0.0091	1.49013	2.19722	21.4543	3	0	0.404582	0.336066	0.314287	0.397087	0.285514	4	2.47169	0.00306088	-2.1727	2.22385
57	I65	2017	富春股份	300299.SZ	4.20493	0.169346	0.753864	-0.94205	4.87	0.052114	0.0109	0.847257	2.07944	21.5973	3	0	0.54187	0.213509	0.480471	0.394368	0.289858	5	1.84546	1.62245	-4.71474	7.60125
57	I65	2018	富春股份	300299.SZ	4.1178	0.163533	0.622217	-0.997661	5.96	0.0337117	0.0108	1.08968	2.19722	21.5118	1	0	0.543059	0.039482	0.43053	0.394848	0.289968	6	1.84142	0.938091	-3.93364	5.98318
57	I65	2019	富春股份	300299.SZ	4.08327	0.189791	0.462297	-0.914634	8.285	0.02765	0.0121	1.16727	2.19722	21.074	1	0	0.354149	0.265806	0.642084	0.395428	0.289472	7	2.82367	0.42128	-3.32292	4.74299
57	I65	2020	富春股份	300299.SZ	4.11226	0.14663	0.634477	-0.922881	7.35	0.013711	0.0135	1.04463	1.94591	20.8826	1	0	0.209113	0.166437	0.608194	0.394803	0.290286	8	4.7821	0.975513	-3.89534	5.91822
57	I65	2021	富春股份	300299.SZ	4.12521	0.192159	0.596586	-0.878137	7.495	0.01963	0.0146	1.27821	1.94591	20.7439	2	0	0.212653	0.080433	0.479754	0.394941	0.289427	9	4.7025	1.22376	-3.97396	6.04346
57	I65	2022	富春股份	300299.SZ	4.06952	0.152931	0.627942	-0.893827	12.31	0.017181	0.0235	1.22415	1.94591	20.7554	3	0	0.27459	0.465383	0.441574	0.394827	0.290168	10	3.6418	1.10568	-3.77702	5.61722
57	I65	2023	富春股份	300299.SZ	4.05829	0.10972	0.689832	-0.902751	15.305	0.00289933	0.02	1.18691	1.94591	20.7603	2	0	0.249677	0.767178	0.435482	0.394602	0.290983	11	4.00518	1.15245	-3.80657	5.69747
58	C14	2015	仙乐健康	300791.SZ	3.94395	0.389351	0.304302	-0.967177	2.6	0.0180343	0.4434	8.16426	1.94591	21.1168	3	0	1.7292	1.50522	0.172571	0.391043	0.310811	0	0.701783	0.71774	-3.15235	3.99214
58	C14	2016	仙乐健康	300791.SZ	3.94388	0.311481	0.342075	-0.975794	1.71	0.0138063	0.4038	7.21546	1.94591	21.233	3	0	1.48669	1.26918	0.173303	0.390827	0.313036	0	0.537564	0.525375	-2.97393	3.73109
58	C14	2017	仙乐健康	300791.SZ	3.94433	0.233611	0.373324	-0.984411	1.945	0.00957833	0.3642	6.26665	1.94591	21.3492	3	0	1.24418	1.03313	0.174035	0.390647	0.315261	0	0.080699	0.694316	-2.77148	3.42537
58	C14	2018	仙乐健康	300791.SZ	3.99169	0.15574	0.765693	-0.993028	1.995	0.00535033	0.3246	5.31785	1.94591	21.4653	2	0	1.00168	0.797084	0.174767	0.388367	0.317485	0	0.698962	1.68775	-4.10948	6.11588
58	C14	2019	仙乐健康	300791.SZ	4.07694	0.0778702	0.52316	-1.00164	2.08	0.00112233	0.285	4.36905	1.94591	21.5815	3	0	0.759172	0.561038	0.175499	0.389782	0.31971	0	1.31723	0.521121	-3.07477	4.37323
58	C14	2020	仙乐健康	300791.SZ	4.00895	0.68886	0.320584	-1.01026	1.565	-0.00310567	0.2454	3.42024	1.94591	21.6977	3	0	0.516666	0.324992	0.176231	0.39095	0.302253	1	1.93549	1.19098	-4.64979	6.64004
58	C14	2021	仙乐健康	300791.SZ	4.00657	0.62622	0.590489	-1.02265	1.755	0.0102523	0.2058	5.75897	1.94591	22.0635	3	0	0.734593	0.067902	0.333847	0.389391	0.304043	2	1.3613	1.86408	-5.43475	8.18545
58	C14	2022	仙乐健康	300791.SZ	4.03289	0.62622	0.667153	-1.02953	1.61	0.00287967	0.2951	5.17903	1.94591	22.155	3	0	0.740861	0.304211	0.354601	0.388944	0.304043	3	1.34978	2.50684	-5.80736	8.93491
58	C14	2023	仙乐健康	300791.SZ	4.05951	0.496357	0.598188	-1.0587	1.54	-0.0361423	0.2771	2.57336	1.94591	22.3711	3	0	0.62796	0.234685	0.5061	0.389347	0.307754	4	1.59246	1.91415	-5.06928	7.70903
59	C19	2015	华利集团	300979.SZ	4.21307	0.440622	0	-1.04556	1.285	0.184656	0.3361	2.10107	2.56495	23.1713	1	0	0.674641	-0.814258	0.899729	0.373188	0.0481803	0	1.4774	0.271031	-2.92932	3.96306
59	C19	2016	华利集团	300979.SZ	4.2124	0.220115	0	-1.05464	1.185	0.158408	0.3186	1.36183	2.56495	23.2273	1	0	0.680962	-0.814258	0.803882	0.373188	0.0757435	0	1.46507	0.194988	-2.00521	2.42942
59	C19	2017	华利集团	300979.SZ	4.16847	0.0560774	0	-1.06372	1.085	0.13216	0.3011	0.622596	2.56495	23.2832	2	0	0.687283	-0.814258	0.708035	0.373188	0.0962483	0	1.45273	0.566887	-1.19667	1.5
59	C19	2018	华利集团	300979.SZ	4.09786	0.00497694	0.629927	-1.07281	0.985	0.105912	0.2836	0.11664	2.56495	23.3392	3	0	0.693604	-0.814258	0.612188	0.352292	0.102636	0	1.44039	0.417534	-3.24498	4.80247
59	C19	2019	华利集团	300979.SZ	4.00498	0.0106932	0.511276	-1.08189	0.97	0.0796643	0.2661	0.855876	2.56495	23.3951	1	0	0.699925	-0.814258	0.516341	0.356576	0.101921	0	1.42805	0.220986	-2.54678	3.32057
59	C19	2020	华利集团	300979.SZ	3.99977	0.0164094	0.450449	-1.09097	0.8	0.0534163	0.2486	1.59511	2.56495	23.4511	1	0	0.706246	-0.814258	0.420494	0.358703	0.101207	0	1.41571	0.29377	-2.31873	2.87421
59	C19	2021	华利集团	300979.SZ	4.037	0.0221257	0.648427	-1.10005	0.67	0.0271683	0.2311	2.33435	2.56495	23.507	3	0	0.712567	-0.123911	0.324647	0.351607	0.100492	0	1.40338	0.515496	-3.21925	4.63628
59	C19	2022	华利集团	300979.SZ	4.20108	0.027842	0.685198	-1.10913	0.705	0.00092033	0.2136	3.07358	2.56495	23.5629	3	0	0.718888	1.08949	0.2288	0.350232	0.0997777	1	1.39104	0.882672	-3.84417	6.08556
59	C19	2023	华利集团	300979.SZ	4.12884	0.0272019	0.415309	-1.11667	0.77	0.00738867	0.1961	3.14643	2.56495	23.6909	1	0	0.770348	1.13149	0.222696	0.359912	0.0998577	2	1.29811	0.471082	-2.58657	3.5841
60	C37	2015	久祺股份	300994.SZ	4.07138	0.140877	0	-1.02419	0.21	0.012816	0.128	1.71484	1.94591	22.0097	2	0	-0.003002	2.94333	0.976365	0.387657	0.100279	0	4.9697	0.697903	-1.28063	1.5
60	C37	2016	久祺股份	300994.SZ	4.07093	0.0725986	0	-1.01964	0.24	0.0122057	0.1003	1.07987	1.94591	21.905	3	0	-0.003002	2.94333	0.976365	0.387657	0.10138	0	4.47535	0.680503	-0.993809	1.5
60	C37	2017	久祺股份	300994.SZ	4.06462	0.191064	0	-1.01509	0.27	0.0115953	0.0726	0.444899	1.94591	21.8002	2	0	-0.003002	2.94333	0.923316	0.387657	0.099469	0	3.98101	0.28872	-1.47167	1.5
60	C37	2018	久祺股份	300994.SZ	4.07203	0.173031	0	-1.01053	0.3	0.010985	0.0449	0.190069	1.94591	21.6954	1	0	0.008677	2.94333	0.80298	0.387657	0.0997599	0	3.48666	0.740723	-1.41691	1.5
60	C37	2019	久祺股份	300994.SZ	4.04916	0.391007	0	-1.00598	0.33	0.0103747	0.0172	0.825037	1.94591	21.5907	2	0	0.17215	2.94333	0.682644	0.387657	0.0962442	0	2.99231	0.190937	-2.2648	2.48252
60	C37	2020	久祺股份	300994.SZ	4.02685	0.00026769	0.402128	-1.00143	0.325	0.00976433	0.0105	1.46	1.94591	21.4859	1	0	0.335623	2.94333	0.562308	0.386304	0.102546	0	2.49797	0.179818	-2.1381	2.59267
60	C37	2021	久祺股份	300994.SZ	3.98527	0.00127893	0.806378	-0.996871	0.245	0.009154	0.0382	2.09497	1.94591	21.3812	3	0	0.499096	2.0466	0.441972	0.384925	0.10253	0	2.00362	0.685648	-3.60437	5.30121
60	C37	2022	久祺股份	300994.SZ	4.01865	0.00229017	0.659704	-0.992317	0.465	0.00854367	0.0659	2.72994	1.94591	21.2764	1	0	0.662569	0.069207	0.321636	0.385427	0.102514	1	1.50928	0.450185	-3.12913	4.45486
60	C37	2023	久祺股份	300994.SZ	4.00051	0.0172926	0.628966	-0.99469	0.725	0.0128347	0.0936	2.51947	1.94591	21.2889	1	0	0.700578	-0.145531	0.333285	0.385532	0.102272	2	1.42739	0.843549	-3.02132	4.2058
61	C24	2015	华立科技	301011.SZ	3.97725	0.62622	0.345076	-1.2367	5.745	-0.0149467	0.276	3.63409	1.79176	21.2203	3	0	1.01212	0.559442	0.147253	0.393541	0.246967	0	0.300305	1.36713	-4.39503	6.16704
61	C24	2016	华立科技	301011.SZ	4.00025	0.62622	0.73633	-1.2367	4.685	-0.00780133	0.2698	3.34967	1.79176	21.1697	2	0	0.934254	0.450847	0.190102	0.3923	0.246967	0	0.305585	2.51529	-5.9864	9.22025
61	C24	2017	华立科技	301011.SZ	4.07656	0.596975	0.443232	-1.225	3.625	-0.000656	0.2636	3.06525	1.79176	21.119	1	0	0.856393	0.342252	0.232951	0.393231	0.247438	0	0.611475	1.51839	-4.93276	7.37883
61	C24	2018	华立科技	301011.SZ	4.01664	0.514	0.443337	-1.16052	2.565	0.00648933	0.2574	2.78083	1.79176	21.0684	2	0	0.778532	0.233657	0.2758	0.393231	0.248777	0	0.917365	1.355	-4.41906	6.38875
61	C24	2019	华立科技	301011.SZ	3.99412	0.431024	0.653935	-1.09603	1.505	0.0136347	0.2512	2.49641	1.79176	21.0178	2	0	0.700671	0.125062	0.318649	0.392563	0.250115	0	1.22325	1.59174	-4.83132	7.21491
61	C24	2020	华立科技	301011.SZ	3.99106	0.348049	0.720332	-1.03155	1.435	0.02078	0.245	2.21199	1.79176	20.9672	3	0	0.62281	0.016467	0.361498	0.392351	0.251453	0	1.52914	1.74321	-4.73495	7.10946
61	C24	2021	华立科技	301011.SZ	4.03806	0.265073	0.639535	-0.967061	1.375	0.0279253	0.2388	1.92757	1.79176	20.9166	1	0	0.544949	-0.092128	0.404347	0.392608	0.252792	0	1.83503	1.4249	-4.20356	6.26239
61	C24	2022	华立科技	301011.SZ	4.03762	0.182098	0.520355	-0.902575	1.98	0.0350707	0.2326	1.64315	1.79176	20.8659	1	0	0.467088	-0.200723	0.447196	0.392987	0.25413	1	2.14093	1.17033	-3.3901	4.80256
61	C24	2023	华立科技	301011.SZ	4.04721	0.131367	0.582925	-1.0115	1.675	0.0344317	0.2264	1.78792	1.79176	20.8709	1	0	0.442069	-0.39322	0.404175	0.392788	0.254948	2	2.26209	0.843277	-3.44889	4.98002
62	C18	2015	贵人鸟	603555.SH	3.97027	0.325642	0.350449	-1.04541	0.925	0.0229143	0.1125	2.02799	2.19722	22.2975	3	0	0.573311	0.472337	0.50604	0.400375	0.144451	1	1.74425	0.847129	-3.13942	4.0742
62	C18	2016	贵人鸟	603555.SH	3.99945	0.352339	0.47898	-1.05758	0.975	0.0137487	0.0878	1.60883	2.19722	22.7906	1	0	0.728932	1.50063	0.606162	0.399931	0.143947	2	1.37187	1.14794	-3.83416	5.41228
62	C18	2017	贵人鸟	603555.SH	4.02138	0.292154	0.486338	-1.06027	0.895	0.008254	0.1063	1.17409	2.3979	22.7491	2	0	0.471489	0.275756	0.65359	0.399906	0.145083	3	2.12094	0.914649	-3.67233	5.20148
62	C18	2018	贵人鸟	603555.SH	4.11599	0.00759396	0.461395	-0.973022	1.435	-0.0486413	0.1116	0.771626	1.94591	22.282	2	0	0.693867	-0.333257	0.678099	0.399992	0.150452	4	1.4412	0.262022	-2.64861	3.69985
62	C18	2019	贵人鸟	603555.SH	4.12502	0	0.5089	-0.924947	1.585	-0.0948513	0.1278	0.541692	1.94591	22.072	1	0	0.539895	0.14709	0.889553	0.399828	0.150595	5	1.85221	0.364474	-2.82748	4.0612
62	C18	2020	贵人鸟	603555.SH	4.11932	0	0.588204	-0.930663	1.82	-0.0354623	0.1255	0.46857	1.79176	21.9968	3	0	0.721195	0.160538	0.976365	0.399553	0.150595	6	1.38659	0.626835	-3.12116	4.60824
62	C18	2021	贵人鸟	603555.SH	4.14225	0	0.605143	-0.928626	0.66	0.0427517	0.1204	2.62263	1.94591	21.7636	3	0	0.527816	0.580233	0.3509	0.399494	0.150595	7	1.8946	0.861678	-3.25121	4.89251
62	C18	2022	贵人鸟	603555.SH	4.14443	0.169891	0.735616	-0.963624	0.645	-0.00085667	0.1972	1.37458	1.94591	21.8329	1	0	0.43157	2.33536	0.436402	0.39904	0.147389	8	2.31712	1.36764	-4.47712	7.05059
62	C18	2023	贵人鸟	603555.SH	4.15359	0.339782	0.710696	-0.973022	0.63	-0.044465	0.274	0.126531	1.94591	21.9022	2	0	0.335324	2.94333	0.521904	0.399127	0.144184	9	2.73964	1.78304	-5.11593	8.10782
63	C17	2015	浙江自然	605080.SH	4.07733	0	0.732153	-1.00517	1.81	0.070639	0.0663	4.32903	2.07944	20.8098	2	0	-0.003002	1.96105	0.175254	0.410809	0.0248172	0	3.70135	1.15225	-3.56597	5.38172
63	C17	2016	浙江自然	605080.SH	4.08034	0	0.451799	-1.00506	1.8	0.065543	0.0309	4.75904	2.07944	20.8958	1	0	-0.003002	1.68507	0.164921	0.412566	0.0248172	0	3.38674	0.368064	-2.48002	3.32908
63	C17	2017	浙江自然	605080.SH	4.10237	0	0.178386	-1.00496	1.79	0.060447	0.0045	5.18904	2.07944	20.9817	3	0	0.088506	1.40909	0.154588	0.414251	0.0248172	0	3.07213	0.642776	-1.47417	1.5
63	C17	2018	浙江自然	605080.SH	4.11177	0	0.70666	-1.00485	1.76	0.055351	0.0399	5.61905	2.07944	21.0677	2	0	0.20422	1.13311	0.144255	0.41097	0.0248172	0	2.75752	1.13611	-3.56248	5.43194
63	C17	2019	浙江自然	605080.SH	4.06092	0	0.574695	-1.00474	1.815	0.050255	0.0753	6.04905	2.07944	21.1537	1	0	0.319934	0.857135	0.133922	0.4118	0.0248172	0	2.44291	0.665818	-2.9056	4.10339
63	C17	2020	浙江自然	605080.SH	4.10872	0	0.705336	-1.00464	1.865	0.045159	0.1107	6.47905	2.07944	21.2396	2	0	0.435648	0.581157	0.123589	0.410979	0.0248172	0	2.1283	0.776666	-3.54882	5.40103
63	C17	2021	浙江自然	605080.SH	4.01585	0	0.386692	-1.00453	1.825	0.040063	0.1461	6.90906	2.07944	21.3256	1	0	0.551362	0.305179	0.113256	0.41297	0.0248172	0	1.81369	0.190494	-2.04604	2.40034
63	C17	2022	浙江自然	605080.SH	3.96637	0.0225071	0.597098	-1.00442	2.465	0.034967	0.1815	7.33906	2.07944	21.4116	1	0	0.667076	0.029201	0.102923	0.41166	0.0239516	1	1.49908	0.933478	-2.82354	3.76952
63	C17	2023	浙江自然	605080.SH	4.00845	0.0934045	0.611168	-1.00884	2.165	0.0198177	0.2169	5.61409	2.07944	21.4915	2	0	0.853126	-0.141968	0.127673	0.411571	0.0212247	2	1.17216	0.430362	-3.29231	4.65698
64	C24	2015	共创草坪	605099.SH	3.92205	0	0.340531	-1.13811	1.84	-0.146641	0.5185	17.6025	1.94591	20.7147	3	0	0.648854	1.85543	0.102588	0.393555	0.257067	0	1.54057	0.506615	-1.60434	1.5
64	C24	2016	共创草坪	605099.SH	3.92204	0	0.549947	-1.11468	1.775	-0.116798	0.4781	16.953	1.94591	20.8619	3	0	0.651249	1.61478	0.057694	0.392893	0.257067	0	1.53511	0.603028	-2.42174	2.95732
64	C24	2017	共创草坪	605099.SH	3.92205	0	0.67517	-1.09124	1.71	-0.0869547	0.4377	14.3892	1.94591	21.0092	1	0	0.653644	1.37413	0.0128	0.392495	0.257067	0	1.52964	0.887009	-2.91059	3.88359
64	C24	2018	共创草坪	605099.SH	3.92205	0	0.338923	-1.06781	1.8	-0.0571113	0.3973	11.8253	1.94591	21.1565	2	0	0.656039	1.13347	0.032094	0.39356	0.257067	0	1.52418	0.157343	-1.59806	1.5
64	C24	2019	共创草坪	605099.SH	3.92205	0	0.407083	-1.04438	1.6875	-0.027268	0.3569	9.2614	1.94591	21.3037	2	0	0.658434	0.89282	0.076988	0.393345	0.257067	0	1.51871	0.0622663	-1.86413	1.9008
64	C24	2020	共创草坪	605099.SH	3.92204	0	0.456098	-1.02094	1.575	0.00257533	0.3165	6.69752	1.94591	21.451	2	0	0.660829	0.652167	0.121882	0.39319	0.257067	0	1.51325	0.0347963	-2.05541	2.2632
64	C24	2021	共创草坪	605099.SH	3.92272	0.00767628	0.467048	-0.99751	1.615	0.0324187	0.2761	4.13364	1.94591	21.5983	3	0	0.663224	0.411514	0.166776	0.393156	0.256943	1	1.50779	0.134962	-2.13217	2.40218
64	C24	2022	共创草坪	605099.SH	3.96123	0	0.534691	-1.02431	1.605	0.15394	0.2357	3.768	1.94591	21.7637	2	0	0.801358	0.120641	0.191179	0.392941	0.257067	2	1.24788	0.349144	-2.47148	3.11627
64	C24	2023	共创草坪	605099.SH	4.06986	0.0114875	0.725717	-1.0359	1.685	0.275461	0.192	3.73707	1.94591	21.8611	3	0	0.35856	0.001272	0.201254	0.392334	0.256882	3	2.78893	1.06922	-3.56806	5.36196
65	C17	2015	华生科技	605180.SH	3.96817	0	0.662786	-1.21566	2.185	0.234969	0.2553	2.10107	1.94591	21.5079	2	0	-0.003002	1.5668	0.410422	0.411247	0.0248172	0	2.95093	0.461788	-2.99085	4.1118
65	C17	2016	华生科技	605180.SH	3.96799	0	0.618463	-1.17853	2.055	0.203893	0.2423	2.10107	1.94591	21.4129	2	0	0.006277	1.33195	0.354877	0.411526	0.0248172	0	2.70598	0.869679	-2.81733	3.78273
65	C17	2017	华生科技	605180.SH	3.96817	0	0.675647	-1.1414	1.925	0.172817	0.2293	2.10107	1.94591	21.3179	2	0	0.140046	1.09709	0.299332	0.411166	0.0248172	0	2.46102	0.692109	-3.04103	4.20687
65	C17	2018	华生科技	605180.SH	3.96817	0	0.546764	-1.10427	1.795	0.141741	0.2163	2.10107	1.94591	21.223	2	0	0.273815	0.86224	0.243787	0.411975	0.0248172	0	2.21607	0.325868	-2.53796	3.25369
65	C17	2019	华生科技	605180.SH	3.96817	0	0.470924	-1.06714	1.665	0.110665	0.2033	2.10107	1.94591	21.128	1	0	0.407584	0.627386	0.188242	0.412448	0.0248172	0	1.97112	0.773279	-2.24192	2.69277
65	C17	2020	华生科技	605180.SH	3.96865	0	0.650989	-1.03001	1.665	0.0795887	0.1903	2.10107	1.94591	21.033	1	0	0.541353	0.392532	0.132697	0.411321	0.0248172	0	1.72617	0.520462	-2.94614	4.02787
65	C17	2021	华生科技	605180.SH	4.00468	0	0.678315	-0.992879	1.725	0.0485127	0.1773	10.489	1.94591	20.9381	2	0	0.675122	0.157678	0.077152	0.411149	0.0248172	0	1.48121	1.041	-3.15326	4.47979
65	C17	2022	华生科技	605180.SH	4.05349	0	0.731614	-0.955748	2.37	0.0174367	0.1643	17.6025	1.94591	20.8431	1	0	0.808891	-0.077176	0.021607	0.410813	0.0248172	1	1.23626	1.01062	-3.49739	5.21241
65	C17	2023	华生科技	605180.SH	4.12709	0	0.824578	-0.975089	2.73	0.008182	0.1513	17.6025	1.94591	20.8471	1	0	0.757346	1.04316	0.023918	0.410223	0.0248172	2	1.3204	1.09807	-4.06548	6.41031
66	C24	2015	舒华体育	605299.SH	4.01818	0	0.395074	-1.16445	0.13	0.0298467	0.556169	0.218452	2.19722	21.9515	2	0	1.73781	2.94333	0.694729	0.393383	0.257067	0	0.701783	0.239672	-2.08527	2.47851
66	C24	2016	舒华体育	605299.SH	4.01791	0	0.385882	-1.13274	0.385	0.0284213	0.5287	0.521686	2.19722	21.8459	1	0	1.73781	2.94333	0.62748	0.393412	0.257067	0	0.701783	0.488739	-2.04865	2.40869
66	C24	2017	舒华体育	605299.SH	4.01818	0	0.404287	-1.10104	0.64	0.026996	0.5007	0.82492	2.19722	21.7403	3	0	1.73781	2.5297	0.560231	0.393354	0.257067	0	0.701783	0.302288	-2.12124	2.54668
66	C24	2018	舒华体育	605299.SH	4.01819	0	0.339751	-1.06933	0.895	0.0255707	0.4727	1.12815	2.19722	21.6348	1	0	1.42822	1.88354	0.492982	0.393557	0.257067	0	0.396352	0.353489	-1.86936	2.06943
66	C24	2019	舒华体育	605299.SH	4.01819	0	0.339936	-1.03763	1.075	0.0241453	0.4447	1.43139	2.19722	21.5292	2	0	1.11863	1.23738	0.425733	0.393557	0.257067	0	0.469845	0.231329	-1.87008	2.0708
66	C24	2020	舒华体育	605299.SH	4.01792	0	0.537888	-1.00592	1.11	0.02272	0.4167	1.73462	2.19722	21.4236	3	0	0.809034	0.591217	0.358484	0.392931	0.257067	0	1.23604	0.0279555	-2.64201	3.53296
66	C24	2021	舒华体育	605299.SH	4.01432	0.0067329	0.433197	-0.974214	1.11	0.0212947	0.3887	2.03786	2.19722	21.318	1	0	0.499441	-0.054945	0.291235	0.393263	0.256958	1	2.00224	0.0597115	-2.25148	2.78039
66	C24	2022	舒华体育	605299.SH	4.04225	0.0192031	0.597036	-0.992179	1.145	0.0198693	0.3607	2.10359	2.19722	21.3308	1	0	0.656236	0.102438	0.298421	0.392744	0.256757	2	1.52384	0.727206	-3.02106	4.27232
66	C24	2023	舒华体育	605299.SH	4.08306	0.0245316	0.672544	-1.01646	0.98	0.021875	0.3079	2.04167	2.19722	21.3989	1	0	0.41682	-0.059275	0.330092	0.392503	0.256671	3	2.39912	0.552026	-3.45187	5.15068
67	C15	2015	东鹏饮料	605499.SH	3.9802	0.161586	0.494973	-1.03775	0.435	0.114579	0.1174	0.638759	1.60944	20.2497	1	0	0.809217	-0.814258	0.102588	0.398032	0.0715587	0	0.807403	0.816636	-3.04513	4.07445
67	C15	2016	东鹏饮料	605499.SH	3.98011	0.140292	0.414527	-1.04541	0.41	0.10399	0.1275	0.393136	1.60944	20.6708	2	0	0.763025	-0.814258	0.102588	0.399893	0.0742205	0	0.986081	0.621691	-2.6418	3.33118
67	C15	2017	东鹏饮料	605499.SH	3.98021	0.118997	0.401116	-1.05307	0.385	0.0934007	0.1376	0.147513	1.60944	21.0919	3	0	0.716833	-0.814258	0.013429	0.4002	0.0768823	0	1.16476	0.390612	-2.50067	3.08503
67	C15	2018	东鹏饮料	605499.SH	3.98021	0.0977032	0.372544	-1.06073	0.36	0.0828113	0.1477	0.09811	1.72609	21.5129	3	0	0.670641	-0.814258	0.103925	0.40085	0.0795441	0	1.34344	0.616519	-2.30009	2.72609
67	C15	2019	东鹏饮料	605499.SH	3.98021	0.0764089	0.419951	-1.0684	0.335	0.072222	0.1578	0.343733	1.84388	21.934	3	0	0.624449	-0.814258	0.221279	0.399768	0.0822059	0	1.52212	0.277909	-2.39608	2.92906
67	C15	2020	东鹏饮料	605499.SH	3.9801	0.0551147	0.631919	-1.07606	0.36	0.0616327	0.1679	0.589356	1.96166	22.3551	1	0	0.578257	-0.814258	0.338633	0.394782	0.0848677	0	1.70079	0.921572	-3.13413	4.34837
67	C15	2021	东鹏饮料	605499.SH	3.99183	0.0338204	0.6939	-1.08372	0.305	0.0510433	0.178	0.834979	2.07944	22.7762	2	0	0.532065	0.231544	0.455987	0.393276	0.0875294	0	1.87947	0.860626	-3.31972	4.74048
67	C15	2022	东鹏饮料	605499.SH	4.05745	0.0125261	0.643097	-1.09138	0.255	0.040454	0.1881	1.0806	2.19722	23.1973	1	0	0.485873	2.94333	0.573341	0.394512	0.0901912	1	2.05815	0.741408	-3.21531	4.67208
67	C15	2023	东鹏饮料	605499.SH	4.12974	0.0376074	0.705669	-1.11919	0.24	0.0462217	0.1982	1.08962	2.07944	23.4118	1	0	0.356515	2.94333	0.570106	0.392987	0.0870561	2	2.80493	0.368451	-3.76601	5.81002
68	C14	2015	奥瑞金	833429.BJ	3.94723	0.133022	0.663115	-0.813916	6.5855	0.0635737	0.449661	3.28277	2.19722	20.3294	2	0	1.73781	2.94333	0.29468	0.388968	0.318134	0	0.701783	1.34545	-3.49008	4.89137
68	C14	2016	奥瑞金	833429.BJ	3.87425	0.171399	0.480064	-0.836706	2.323	0.0401213	0.130208	3.21462	2.19722	20.3739	2	0	1.73781	-0.814258	0.289564	0.390032	0.317038	0	0.701783	0.662234	-2.73257	3.29759
68	C14	2017	奥瑞金	833429.BJ	3.95725	0.145053	0.474212	-0.859496	2.2865	0.016669	0.246951	3.14648	2.19722	20.4883	2	0	1.73781	-0.814258	0.284448	0.390066	0.317791	0	0.409059	0.557377	-2.83096	3.64715
68	C14	2018	奥瑞金	833429.BJ	3.91362	0.580846	0.535937	-0.882286	0.185	0.0452263	0.0901168	3.07833	2.19722	20.3581	2	0	1.73781	2.94333	0.279332	0.389708	0.30534	0	0.116335	1.85648	-4.77286	6.82284
68	C14	2019	奥瑞金	833429.BJ	3.87783	0.414709	0.593323	-0.905076	10.188	0.0416783	0.0325678	3.01018	2.19722	20.4049	3	0	1.56635	-0.814258	0.274216	0.389375	0.310086	0	0.176389	1.35421	-4.20223	5.84712
68	C14	2020	奥瑞金	833429.BJ	3.87425	0.279725	0.504526	-0.927866	1.9095	0.0381303	0.168769	2.94204	2.19722	20.4305	1	0	1.36032	2.94333	0.2691	0.38989	0.313943	0	0.469113	1.15806	-3.28111	4.22962
68	C14	2021	奥瑞金	833429.BJ	3.91535	0.246664	0.511168	-0.950656	9	0.0345823	0.236474	2.87389	2.19722	20.5178	1	0	1.15429	-0.814258	0.263984	0.389852	0.314888	0	0.761837	1.26531	-3.28334	4.33445
68	C14	2022	奥瑞金	833429.BJ	3.91555	0.184824	0.641275	-0.973446	2.4915	0.0310343	0.225013	2.80575	2.19722	20.7207	3	0	0.948262	-0.814258	0.258868	0.389095	0.316654	1	1.05456	1.22837	-3.53314	4.86934
68	C14	2023	奥瑞金	833429.BJ	3.87425	0.0921803	0.512621	-0.996236	0.9575	0.0274863	0.2978	2.7376	2.19722	20.79	3	0	0.742234	0.162042	0.253752	0.389843	0.319301	2	1.34729	0.265866	-2.52834	2.98909
69	C39	2015	奥佳华	870199.BJ	3.87425	0	0.488449	-0.983247	2.1455	0.044305	0.0562108	17.6025	2.07944	17.597	1	0	0.855842	2.94333	0.102588	0.414619	0.0415419	0	1.16481	0.137567	-2.04846	2.17115
69	C39	2016	奥佳华	870199.BJ	3.91493	0	0.620632	-0.979276	0.234	0.280396	0.369823	17.6025	2.07944	17.597	3	0	0.849807	2.94333	0.102588	0.41197	0.0415419	0	1.17399	0.505093	-2.67784	3.43082
69	C39	2017	奥佳华	870199.BJ	3.91956	0.0703934	0.657461	-0.975305	0.044	0.310942	0.469982	16.5687	2.07944	17.597	2	0	0.843772	2.94333	0.102588	0.411219	0.0327427	0	1.18318	0.566991	-3.12892	4.22343
69	C39	2018	奥佳华	870199.BJ	3.87425	0.021631	0.595122	-0.971334	8.503	0.192763	0.12005	14.4528	2.07944	17.597	1	0	0.837737	2.94333	0.102588	0.412486	0.038838	0	1.19236	0.655045	-2.55532	3.1101
69	C39	2019	奥佳华	870199.BJ	3.99199	0.00783042	0.730896	-0.967363	1.6815	0.0702803	0.020743	12.3369	2.07944	17.597	3	0	0.831702	7.4393	0.0399	0.409704	0.0405631	0	1.20155	0.771607	-3.35586	4.83496
69	C39	2020	奥佳华	870199.BJ	3.95966	0	0.748131	-0.963392	1.4225	0.0639597	0.128894	10.2211	2.07944	18.1566	3	0	0.825667	1.84455	0.024543	0.409346	0.0415419	0	1.21074	0.828483	-3.30025	4.68397
69	C39	2021	奥佳华	870199.BJ	3.92861	0.0656141	0.512543	-0.959421	6.1575	-0.04151	0.0461839	8.10516	2.07944	19.1897	2	0	0.819632	1.24979	0.088986	0.414141	0.0333401	0	1.21992	0.508738	-2.56848	3.18119
69	C39	2022	奥佳华	870199.BJ	3.97002	0.01696	0.436355	-0.95545	0.057	0.347369	0.0510735	5.98927	2.07944	20.232	1	0	0.813597	0.655042	0.153429	0.415644	0.0394219	1	1.22911	0.132277	-2.18306	2.56749
69	C39	2023	奥佳华	870199.BJ	3.93633	0.149906	0.754285	-0.951479	9.214	0.0221997	0.0474	3.87338	2.07944	20.3069	2	0	0.807562	0.06029	0.217872	0.409217	0.0228036	2	1.23829	1.1151	-3.88619	5.60717
70	C29	2015	青岛双星	000599.SZ	3.88475	0.204621	0.535559	-1.04009	1.73	0.0168747	0.1815	1.2817	2.07944	22.499	3	1	0.605994	0.299325	0.560562	0.409931	0.225865	19	1.65018	1.08933	-3.11741	4.01118
70	C29	2016	青岛双星	000599.SZ	3.90525	0.203602	0.593207	-1.06096	1.155	0.000749	0.2412	1.16391	2.19722	22.704	2	1	0.745647	0.022397	0.627498	0.409562	0.225904	20	1.34112	1.21361	-3.39534	4.57266
70	C29	2017	青岛双星	000599.SZ	3.90781	0.177486	0.507028	-1.01442	1.72	0.00256233	0.3387	0.982771	2.19722	22.8491	2	1	0.861286	0.032996	0.665051	0.410113	0.226909	21	1.16105	0.683493	-2.95684	3.77189
70	C29	2018	青岛双星	000599.SZ	3.91298	0.0501272	0.66531	-1.04731	1.645	0.00372667	0.3384	1.09124	2.07944	22.9166	1	1	1.07345	-0.056684	0.570377	0.4091	0.231807	22	0.931576	0.707721	-3.05646	4.09535
70	C29	2019	青岛双星	000599.SZ	3.90088	0.18986	0.655205	-1.06646	2.315	0.00699633	0.3764	0.94625	2.19722	23.0139	2	1	0.973933	0.011325	0.63229	0.409165	0.226433	23	1.02676	1.36886	-3.56768	4.90558
70	C29	2020	青岛双星	000599.SZ	3.91044	0.123581	0.665263	-1.06759	2.32	0.004519	0.4356	0.809203	2.19722	23.0318	2	1	1.00242	-0.039974	0.650014	0.4091	0.228982	24	0.997589	1.27697	-3.3564	4.5867
70	C29	2021	青岛双星	000599.SZ	3.90877	0.115463	0.598562	-1.0393	2.585	0.00280433	0.4021	0.757126	2.19722	23.1069	2	1	0.968815	-0.024309	0.71132	0.409528	0.229294	25	1.03219	0.466959	-3.05741	4.02547
70	C29	2022	青岛双星	000599.SZ	3.92146	0.0728624	0.638736	-1.00022	2.59	0.004107	0.4334	0.622174	2.19722	23.0121	3	1	0.90468	-0.205134	0.758393	0.40927	0.230933	26	1.10536	0.918472	-3.07144	4.11521
70	C29	2023	青岛双星	000599.SZ	4.0924	0.181017	0.815033	-1.01874	2.195	0.00207967	0.3791	0.671012	2.19722	23.0035	1	1	0.86307	-0.039206	0.786969	0.408132	0.226773	27	1.15865	1.01312	-4.68857	7.35433
																									-0.8	1.5
																									-0.8	1.5
																									-0.8	1.5
																									-0.8	1.5
																									-0.8	1.5
																									-0.8	1.5
																									-0.8	1.5
																									-0.8	1.5
