# Supplementary material
Source: Research Square preprint supplement (doi:10.21203/rs.3.rs-9212289/v1)
Supplement: Supplementary file 2 [file c0130dd88624c0c82c911fba.docx]

1. 选择模型、CATE（条件平均处理效应）、ATE（平均处理效应）、异致性群体分析（箱型图）、CATE分布图、重要性分布图。

# 清除环境，重新开始

rm(list = ls())

# 加载包

library(grf)

library(dplyr)

library(ggplot2)

cat("=== 开始完整因果森林分析 ===\n")

# 1. 创建完整数据

cat("1. 创建完整数据...\n")

set.seed(123)

n <- 1000

research_data <- data.frame(

Roa = rnorm(n),

Fixed = runif(n),

Liquid = rnorm(n, 1, 0.5),

Board = rnorm(n, 2, 1),

Size = rnorm(n, 20, 2),

Life = as.numeric(sample(1:3, n, replace = TRUE)),

Soe = as.numeric(sample(0:1, n, replace = TRUE)),

Bm = runif(n),

Gro = rnorm(n),

Lev = runif(n, 0, 1)

)

# 创建处理变量和结果变量

research_data$Debt <- rbinom(n, 1, plogis(0.3 * research_data$Roa + 0.2 * research_data$Size))

research_data$Rose <- 4 + 0.5 * research_data$Debt + 0.3 * research_data$Roa +

0.2 * research_data$Size + 0.1 * research_data$Board + rnorm(n, 0, 0.5)

cat("数据创建完成! 维度:", dim(research_data), "\n")

# 2. 准备因果森林数据

cat("2. 准备因果森林数据...\n")

covariates <- c("Roa", "Fixed", "Liquid", "Board", "Size", "Life", "Soe", "Bm", "Gro", "Lev")

X <- as.matrix(research_data[, covariates])

Y <- research_data$Rose

W <- research_data$Debt

cat("特征矩阵维度:", dim(X), "\n")

cat("结果变量长度:", length(Y), "\n")

cat("处理变量长度:", length(W), "\n")

# 3. 训练四个因果森林模型

cat("3. 训练因果森林模型...\n")

tree_numbers <- c(500, 1500, 2500, 3500)

models <- list()

variances <- numeric(length(tree_numbers))

set.seed(123)

for (i in seq_along(tree_numbers)) {

cat(" 训练", tree_numbers[i], "棵树的模型...")

cf <- causal_forest(

X = X,

Y = Y,

W = W,

num.trees = tree_numbers[i],

tune.parameters = "all",

honesty = FALSE,

seed = 123

)

models[[i]] <- cf

pred <- predict(cf, estimate.variance = TRUE)

variances[i] <- mean(pred$variance.estimates)

cat(" 完成 ✓\n")

}

# 4. 模型比较

cat("4. 模型性能比较:\n")

results_comparison <- data.frame(

Trees = tree_numbers,

Variance = round(variances, 6)

)

print(results_comparison)

# 5. 选择最佳模型

best_index <- which.min(variances)

best_trees <- tree_numbers[best_index]

best_model <- models[[best_index]]

cat("\n5. 最佳模型选择:\n")

cat(" 最佳模型:", best_trees, "棵树\n")

cat(" 最小方差:", round(variances[best_index], 6), "\n")

# 6. 计算ATE

ate <- average_treatment_effect(best_model)

cat("\n6. 平均处理效应(ATE):\n")

cat(" ATE估计值:", round(ate[1], 6), "\n")

cat(" ATE标准误:", round(ate[2], 6), "\n")

cat(" 95%置信区间: [", round(ate[1] - 1.96 * ate[2], 6), ",",

round(ate[1] + 1.96 * ate[2], 6), "]\n")

# 7. 计算CATE

cat("7. 计算条件平均处理效应(CATE)...\n")

cate_estimates <- predict(best_model)$predictions

research_data$CATE <- cate_estimates

cat(" CATE均值:", round(mean(cate_estimates), 6), "\n")

cat(" CATE标准差:", round(sd(cate_estimates), 6), "\n")

cat(" CATE最小值:", round(min(cate_estimates), 6), "\n")

cat(" CATE最大值:", round(max(cate_estimates), 6), "\n")

# 8. 异质性群体分析

cat("8. 异质性群体分析:\n")

set.seed(123)

cate_clusters <- kmeans(cate_estimates, centers = 3)

research_data$CATE_Cluster <- as.factor(cate_clusters$cluster)

cluster_summary <- research_data %>%

group_by(CATE_Cluster) %>%

summarise(

Count = n(),

Proportion = round(n() / nrow(research_data), 3),

Mean_CATE = round(mean(CATE), 6),

SD_CATE = round(sd(CATE), 6),

Min_CATE = round(min(CATE), 6),

Max_CATE = round(max(CATE), 6)

) %>%

arrange(desc(Mean_CATE))

print(cluster_summary)

# 9. 变量重要性

cat("9. 变量重要性分析:\n")

var_importance <- variable_importance(best_model)

importance_df <- data.frame(

Variable = covariates,

Importance = round(var_importance, 4)

) %>% arrange(desc(Importance))

print(importance_df)

# 10. 保存结果

cat("10. 保存结果...\n")

output_data <- research_data[, c("Rose", "Debt", covariates, "CATE", "CATE_Cluster")]

write.csv(output_data, "causal_forest_results.csv", row.names = FALSE)

cat(" 结果已保存到: causal_forest_results.csv\n")

# 11. 生成可视化

cat("11. 生成可视化图表...\n")

# 模型性能比较图

cat(" 生成图表1: 模型性能比较...\n")

p1 <- ggplot(results_comparison, aes(x = factor(Trees), y = Variance)) +

geom_col(fill = "steelblue", alpha = 0.7) +

geom_text(aes(label = round(Variance, 6)), vjust = -0.5) +

labs(title = "不同树数量模型的预测方差比较",

subtitle = paste("最佳模型:", best_trees, "棵树"),

x = "树数量", y = "平均方差") +

theme_minimal()

print(p1)

# CATE分布图

cat(" 生成图表2: CATE分布...\n")

p2 <- ggplot(research_data, aes(x = CATE)) +

geom_histogram(fill = "lightblue", bins = 30, alpha = 0.7) +

geom_vline(xintercept = ate[1], color = "red", linetype = "dashed", size = 1) +

labs(title = "条件平均处理效应(CATE)分布",

subtitle = paste("红色虚线为ATE =", round(ate[1], 6)),

x = "CATE", y = "频数") +

theme_minimal()

print(p2)

# 异质性群体CATE分布

cat(" 生成图表3: 异质性群体分析...\n")

p3 <- ggplot(research_data, aes(x = CATE_Cluster, y = CATE, fill = CATE_Cluster)) +

geom_boxplot(alpha = 0.7) +

labs(title = "各异质性群体的CATE分布",

x = "群体类别", y = "CATE") +

theme_minimal()

print(p3)

# 变量重要性图

cat(" 生成图表4: 变量重要性...\n")

p4 <- ggplot(importance_df, aes(x = reorder(Variable, Importance), y = Importance)) +

geom_col(fill = "orange", alpha = 0.7) +

coord_flip() +

labs(title = "因果森林变量重要性",

x = "变量", y = "重要性") +

theme_minimal()

print(p4)

cat("\n🎉 === 分析完成! === 🎉\n")

cat("总结:\n")

cat("- 建立了", length(tree_numbers), "个因果森林模型 (500, 1500, 2500, 3500棵树)\n")

cat("- 最佳模型:", best_trees, "棵树\n")

cat("- ATE估计值:", round(ate[1], 6), "\n")

cat("- 识别出", nrow(cluster_summary), "个异质性群体\n")

cat("- 生成了4张可视化图表\n")

cat("- 结果保存到: causal_forest_results.csv\n\n")

cat("研究结论:\n")

cat("根据 Tibshirani 等人的调参说明，在启用交叉验证进行自动调参和关闭诚实算法的基础上，\n")

cat("建立了四个因果森林模型。对比结果显示，参数设置为", best_trees, "棵树的模型在估计\n")

cat("结果上的方差最小，预测精度最佳。因此，后续分析将沿用该模型的参数设置。\n")

# 显示文件位置

cat("\n文件位置信息:\n")

cat("当前工作目录:", getwd(), "\n")

cat("结果文件:", "causal_forest_results.csv\n")

cat("请检查该文件是否已生成。\n")

1. 箱型图、散点图（相关性分析）、重要性排序图，都是合并的

# 安装缺失的包

install.packages(c("tidyr", "patchwork"))

# 加载包

library(grf)

library(dplyr)

library(ggplot2)

library(patchwork)

library(readxl)

library(tidyr)

cat("=== 连续处理变量因果森林分析 ===\n")

# 1. 读取数据

cat("1. 读取数据...\n")

data <- read_excel("D:/HuaweiMoveData/Users/WFH的电脑/Desktop/耐心资本/使用数据/10R语言使用数据.xlsx")

cat("数据维度:", dim(data), "\n")

cat("变量名称:", names(data), "\n")

# 2. 检查处理变量的类型

cat("2. 检查处理变量类型...\n")

cat("Debt的统计摘要:\n")

print(summary(data$Debt))

cat("Debt的取值示例:", head(data$Debt), "\n")

cat("Share的统计摘要:\n")

print(summary(data$Share))

cat("Share的取值示例:", head(data$Share), "\n")

# 3. 数据预处理

cat("3. 数据预处理...\n")

data$Life <- as.numeric(data$Life)

data$Soe <- as.numeric(data$Soe)

# 4. 准备因果森林数据

cat("4. 准备因果森林数据...\n")

covariates <- c("Roa", "Fixed", "Liquid", "Board", "Size", "Life", "Soe", "Bm", "Gro", "Lev")

X <- as.matrix(data[, covariates])

Y <- data$Rose

W_debt <- data$Debt

W_share <- data$Share

cat("特征矩阵维度:", dim(X), "\n")

cat("Debt范围: [", min(W_debt), ",", max(W_debt), "]\n")

cat("Share范围: [", min(W_share), ",", max(W_share), "]\n")

# 5. 分别训练两个因果森林模型（树数量改为3500）

cat("5. 训练因果森林模型（3500棵树）...\n")

# Debt模型（连续处理变量）

cat(" 训练Debt模型...")

cf_debt <- causal_forest(

X = X,

Y = Y,

W = W_debt,

num.trees = 3500,

tune.parameters = "all",

honesty = FALSE,

seed = 123

)

cate_debt <- predict(cf_debt)$predictions

ate_debt <- average_treatment_effect(cf_debt, target.sample = "all", method = "AIPW")

var_imp_debt <- variable_importance(cf_debt)

cat(" 完成 ✓\n")

# Share模型（连续处理变量）

cat(" 训练Share模型...")

cf_share <- causal_forest(

X = X,

Y = Y,

W = W_share,

num.trees = 3500,

tune.parameters = "all",

honesty = FALSE,

seed = 123

)

cate_share <- predict(cf_share)$predictions

ate_share <- average_treatment_effect(cf_share, target.sample = "all", method = "AIPW")

var_imp_share <- variable_importance(cf_share)

cat(" 完成 ✓\n")

# 6. 合并结果到数据框

cat("6. 合并分析结果...\n")

data$CATE_Debt <- cate_debt

data$CATE_Share <- cate_share

# 7. 异质性群体分析

cat("7. 异质性群体分析...\n")

set.seed(123)

cate_clusters <- kmeans(cate_debt, centers = 3)

data$CATE_Cluster <- as.factor(cate_clusters$cluster)

cluster_summary <- data %>%

group_by(CATE_Cluster) %>%

summarise(

Count = n(),

Proportion = round(n() / nrow(data), 3),

Mean_CATE_Debt = round(mean(CATE_Debt), 6),

Mean_CATE_Share = round(mean(CATE_Share), 6),

SD_CATE_Debt = round(sd(CATE_Debt), 6),

SD_CATE_Share = round(sd(CATE_Share), 6)

) %>%

arrange(desc(Mean_CATE_Debt))

print(cluster_summary)

# 8. 主要结果汇总

cat("8. 主要结果汇总:\n")

cat("Debt - ATE估计值:", round(ate_debt[1], 6), "\n")

cat("Debt - ATE标准误:", round(ate_debt[2], 6), "\n")

cat("Debt - 95%置信区间: [", round(ate_debt[1] - 1.96 * ate_debt[2], 6), ",",

round(ate_debt[1] + 1.96 * ate_debt[2], 6), "]\n\n")

cat("Share - ATE估计值:", round(ate_share[1], 6), "\n")

cat("Share - ATE标准误:", round(ate_share[2], 6), "\n")

cat("Share - 95%置信区间: [", round(ate_share[1] - 1.96 * ate_share[2], 6), ",",

round(ate_share[1] + 1.96 * ate_share[2], 6), "]\n\n")

# 9. 变量重要性分析

cat("9. 变量重要性分析:\n")

importance_df <- data.frame(

Variable = covariates,

Importance_Debt = round(var_imp_debt, 4),

Importance_Share = round(var_imp_share, 4)

) %>% arrange(desc(Importance_Debt))

print(importance_df)

# 10. 生成可视化（不使用patchwork的替代方案）

cat("10. 生成可视化图表...\n")

# 10.1 异质性群体对比图

p1 <- ggplot(data, aes(x = CATE_Cluster, y = CATE_Debt, fill = "Debt")) +

geom_boxplot(alpha = 0.7) +

geom_boxplot(aes(y = CATE_Share, fill = "Share"), alpha = 0.7) +

scale_fill_manual(values = c("Debt" = "#1f77b4", "Share" = "#ff7f0e")) +

labs(title = "异质性群体的CATE分布对比（3500棵树）",

subtitle = paste("Debt ATE =", round(ate_debt[1], 4),

"| Share ATE =", round(ate_share[1], 4)),

x = "异质性群体", y = "条件平均处理效应(CATE)",

fill = "解释变量") +

theme_minimal()

print(p1)

# 10.2 CATE散点图

p2 <- ggplot(data, aes(x = CATE_Debt, y = CATE_Share)) +

geom_point(alpha = 0.6, color = "steelblue") +

geom_abline(intercept = 0, slope = 1, linetype = "dashed", color = "red") +

labs(title = "Debt与Share的CATE相关性（3500棵树）",

x = "Debt的CATE", y = "Share的CATE",

subtitle = paste("相关系数 =", round(cor(data$CATE_Debt, data$CATE_Share), 4))) +

theme_minimal()

print(p2)

# 10.3 变量重要性对比图（手动reshape数据，不使用pivot_longer）

importance_long <- data.frame(

Variable = rep(importance_df$Variable, 2),

Importance = c(importance_df$Importance_Debt, importance_df$Importance_Share),

Model = rep(c("Debt", "Share"), each = nrow(importance_df))

)

p3 <- ggplot(importance_long, aes(x = reorder(Variable, Importance), y = Importance, fill = Model)) +

geom_col(position = "dodge", alpha = 0.7) +

coord_flip() +

scale_fill_manual(values = c("Debt" = "#1f77b4", "Share" = "#ff7f0e")) +

labs(title = "变量重要性对比（3500棵树）",

subtitle = "两个解释变量分析的重要性排序",

x = "协变量", y = "重要性") +

theme_minimal()

print(p3)

# 11. 保存结果

cat("11. 保存分析结果...\n")

write.csv(data, "continuous_treatment_3500trees_results.csv", row.names = FALSE)

cat("\n🎉 === 分析完成! === 🎉\n")

cat("重要说明:\n")

cat("1. 使用3500棵树进行因果森林分析\n")

cat("2. 你的Debt和Share是连续变量\n")

cat("3. 使用AIPW方法计算连续处理变量的ATE\n")

cat("4. 生成了3张独立图表\n")

cat("5. 结果已保存到: continuous_treatment_3500trees_results.csv\n")

cat("\n📋 研究结论:\n")

cat("基于3500棵树的连续处理变量因果森林分析，我们发现：\n")

cat("Debt每增加1单位，Rose平均变化", round(ate_debt[1], 4), "单位\n")

cat("Share每增加1单位，Rose平均变化", round(ate_share[1], 4)

cat("两个连续处理变量展现了相似的特征重要性模式，但边际效应大小存在差异。\n"), "单位\n")

1. 平均处理效应的分布图合并版

# 12. 生成条件平均处理效应的合并分布图

cat("12. 生成条件平均处理效应(CATE)的合并分布图...\n")

# 创建合并的CATE分布数据

cate_combined <- data.frame(

CATE = c(data$CATE_Debt, data$CATE_Share),

Treatment = rep(c("Debt", "Share"), each = nrow(data))

)

# CATE合并分布图（密度图）

p_cate_density <- ggplot(cate_combined, aes(x = CATE, fill = Treatment)) +

geom_density(alpha = 0.5) +

scale_fill_manual(values = c("Debt" = "#1f77b4", "Share" = "#ff7f0e")) +

labs(title = "条件平均处理效应(CATE)分布对比",

subtitle = paste("Debt ATE =", round(ate_debt[1], 4),

"| Share ATE =", round(ate_share[1], 4)),

x = "条件平均处理效应(CATE)",

y = "密度",

caption = "注：显示Debt和Share两个解释变量的CATE分布") +

theme_minimal() +

theme(legend.position = "top")

print(p_cate_density)

# CATE合并分布图（直方图）

p_cate_hist <- ggplot(cate_combined, aes(x = CATE, fill = Treatment)) +

geom_histogram(alpha = 0.7, position = "identity", bins = 30) +

scale_fill_manual(values = c("Debt" = "#1f77b4", "Share" = "#ff7f0e")) +

labs(title = "条件平均处理效应(CATE)分布直方图",

subtitle = paste("Debt ATE =", round(ate_debt[1], 4),

"| Share ATE =", round(ate_share[1], 4)),

x = "条件平均处理效应(CATE)",

y = "频数") +

theme_minimal() +

theme(legend.position = "top")

print(p_cate_hist)

# CATE统计摘要

cat("\nCATE分布统计摘要:\n")

cat("Debt的CATE统计:\n")

cat(" 均值:", round(mean(data$CATE_Debt), 6), "\n")

cat(" 标准差:", round(sd(data$CATE_Debt), 6), "\n")

cat(" 最小值:", round(min(data$CATE_Debt), 6), "\n")

cat(" 最大值:", round(max(data$CATE_Debt), 6), "\n")

cat(" 中位数:", round(median(data$CATE_Debt), 6), "\n\n")

cat("Share的CATE统计:\n")

cat(" 均值:", round(mean(data$CATE_Share), 6), "\n")

cat(" 标准差:", round(sd(data$CATE_Share), 6), "\n")

cat(" 最小值:", round(min(data$CATE_Share), 6), "\n")

cat(" 最大值:", round(max(data$CATE_Share), 6), "\n")

cat(" 中位数:", round(median(data$CATE_Share), 6), "\n\n")

# CATE分布差异检验

cate_cor <- cor(data$CATE_Debt, data$CATE_Share)

cat("Debt与Share的CATE相关性:", round(cate_cor, 4), "\n")

# 如果相关性很高，说明异质性模式相似

if (cate_cor > 0.8) {

cat("→ CATE分布高度相关，表明两个解释变量的异质性模式相似\n")

} else if (cate_cor > 0.5) {

cat("→ CATE分布中度相关，异质性模式部分相似\n")

} else {

cat("→ CATE分布相关性较低，异质性模式差异较大\n")

}

# 保存所有图表到文件（可选）

# ggsave("cate_density_plot.png", p_cate_density, width = 10, height = 6)

# ggsave("cate_histogram_plot.png", p_cate_hist, width = 10, height = 6)

cat("\n✅ CATE合并分布图生成完成！\n")

1. 重要性排序图

# 淡蓝色和橘色柱状图带数值标签 - 解释变量命名

p_bar_colored <- ggplot(importance_long_elegant,

aes(x = Importance, y = Variable, fill = Model)) +

geom_col(position = position_dodge(width = 0.8),

width = 0.7, alpha = 0.9,

color = "white", linewidth = 0.3) +

# 在柱状图右侧添加黑色数值标签

geom_text(aes(label = sprintf("%.3f", Importance), group = Model),

position = position_dodge(width = 0.8),

hjust = -0.1, size = 3.2, color = "black") + # 移除 fontface = "bold"

# 淡蓝色和橘色配色

scale_fill_manual(values = c("Debt" = "#6BAED6", # 淡蓝色

"Share" = "#FD8D3C"), # 橘色

name = "解释变量") + # 修改图例标题

scale_x_continuous(expand = expansion(mult = c(0, 0.2))) +

theme_minimal(base_size = 13) +

theme(

plot.title = element_text(hjust = 0.5, size = 15, # 移除 face = "bold"

color = "black", margin = margin(b = 8)),

plot.subtitle = element_text(hjust = 0.5, color = "grey40",

margin = margin(b = 12)),

axis.title = element_text(color = "black"), # 移除 face = "bold"

axis.text = element_text(color = "black"),

axis.text.y = element_text(), # 移除 face = "bold"

legend.position = "top",

legend.title = element_text(), # 移除 face = "bold"

panel.grid.major.y = element_line(color = "grey90"),

panel.grid.major.x = element_line(color = "grey90"),

panel.grid.minor = element_blank()

) +

labs(title = "变量重要性比较",

subtitle = "基于因果森林模型（3,500棵树）",

x = "重要性分数", y = "协变量", fill = "解释变量")

print(p_bar_colored)

5、群体异质性分析：

# 清除环境，重新开始

rm(list = ls())

# 加载包

library(grf)

library(dplyr)

library(ggplot2)

library(readxl)

cat("=== 开始完整因果森林分析（双处理变量优化版） ===\n")

# 1. 读取数据

cat("1. 读取数据...\n")

data <- read_excel("D:/HuaweiMoveData/Users/WFH的电脑/Desktop/耐心资本/使用数据/10R语言使用数据.xlsx")

# 检查数据基本信息

cat("数据维度:", dim(data), "\n")

cat("变量名称:", names(data), "\n")

# 2. 数据预处理和变量定义

cat("2. 数据预处理和变量定义...\n")

# 定义基础协变量（不包括Debt和Share）

base_covariates <- c("Roa", "Fixed", "Liquid", "Board", "Size", "Life", "Soe", "Bm", "Gro", "Lev")

# 移除可能不存在的变量

base_covariates <- base_covariates[base_covariates %in% names(data)]

cat("基础协变量:", base_covariates, "\n")

# 3. 准备两个处理变量的数据

cat("3. 准备两个处理变量的数据...\n")

# 模型1：Debt作为处理变量，Share作为协变量

cat(" 准备模型1数据 (Debt作为处理变量)...\n")

X_debt <- as.matrix(data[, c("Share", base_covariates)])

Y_debt <- data$Rose

W_debt <- data$Debt

# 模型2：Share作为处理变量，Debt作为协变量

cat(" 准备模型2数据 (Share作为处理变量)...\n")

X_share <- as.matrix(data[, c("Debt", base_covariates)])

Y_share <- data$Rose

W_share <- data$Share

# 4. 训练因果森林模型的函数（固定500棵树）

train_causal_forest <- function(X, Y, W, model_name, num_trees = 500) {

cat(" 训练", model_name, "模型...\n")

cf <- causal_forest(

X = X,

Y = Y,

W = W,

num.trees = num_trees,

tune.parameters = "all",

honesty = FALSE,

seed = 123

)

pred <- predict(cf, estimate.variance = TRUE)

variance <- mean(pred$variance.estimates)

cat(" 完成 ✓\n")

return(list(

model = cf,

trees = num_trees,

variance = variance

))

}

# 5. 训练两个模型（固定500棵树）

cat("4. 训练因果森林模型（固定500棵树）...\n")

set.seed(123)

# 训练Debt模型

debt_results <- train_causal_forest(

X = X_debt, Y = Y_debt, W = W_debt,

model_name = "Debt作为处理变量",

num_trees = 500

)

# 训练Share模型

share_results <- train_causal_forest(

X = X_share, Y = Y_share, W = W_share,

model_name = "Share作为处理变量",

num_trees = 500

)

# 6. 模型性能报告

cat("5. 模型性能报告:\n")

cat(" Debt模型 - 树数量:", debt_results$trees, "方差:", round(debt_results$variance, 6), "\n")

cat(" Share模型 - 树数量:", share_results$trees, "方差:", round(share_results$variance, 6), "\n")

# 7. 计算ATE

cat("6. 平均处理效应(ATE)分析:\n")

# Debt模型的ATE

ate_debt <- average_treatment_effect(debt_results$model)

cat(" Debt模型ATE:\n")

cat(" 估计值:", round(ate_debt[1], 6), "\n")

cat(" 标准误:", round(ate_debt[2], 6), "\n")

cat(" 95%置信区间: [", round(ate_debt[1] - 1.96 * ate_debt[2], 6), ",",

round(ate_debt[1] + 1.96 * ate_debt[2], 6), "]\n")

# Share模型的ATE

ate_share <- average_treatment_effect(share_results$model)

cat(" Share模型ATE:\n")

cat(" 估计值:", round(ate_share[1], 6), "\n")

cat(" 标准误:", round(ate_share[2], 6), "\n")

cat(" 95%置信区间: [", round(ate_share[1] - 1.96 * ate_share[2], 6), ",",

round(ate_share[1] + 1.96 * ate_share[2], 6), "]\n")

# 8. 计算CATE

cat("7. 条件平均处理效应(CATE)分析...\n")

# Debt模型的CATE

cate_debt <- predict(debt_results$model)$predictions

data$CATE_Debt <- cate_debt

# Share模型的CATE

cate_share <- predict(share_results$model)$predictions

data$CATE_Share <- cate_share

cat(" Debt模型CATE:\n")

cat(" 均值:", round(mean(cate_debt), 6), " 标准差:", round(sd(cate_debt), 6), "\n")

cat(" 范围: [", round(min(cate_debt), 6), ",", round(max(cate_debt), 6), "]\n")

cat(" Share模型CATE:\n")

cat(" 均值:", round(mean(cate_share), 6), " 标准差:", round(sd(cate_share), 6), "\n")

cat(" 范围: [", round(min(cate_share), 6), ",", round(max(cate_share), 6), "]\n")

# 9. 异质性群体分析

cat("8. 异质性群体分析...\n")

analyze_heterogeneity <- function(cate_estimates, data, cluster_name) {

set.seed(123)

cate_clusters <- kmeans(cate_estimates, centers = 3)

data[[paste0("Cluster_", cluster_name)]] <- as.factor(cate_clusters$cluster)

cluster_summary <- data %>%

group_by(.data[[paste0("Cluster_", cluster_name)]]) %>%

summarise(

Count = n(),

Proportion = round(n() / nrow(data), 3),

Mean_CATE = round(mean(.data[[paste0("CATE_", cluster_name)]]), 6),

SD_CATE = round(sd(.data[[paste0("CATE_", cluster_name)]]), 6)

) %>%

arrange(desc(Mean_CATE))

return(list(summary = cluster_summary, data = data))

}

# Debt模型异质性分析

debt_hetero <- analyze_heterogeneity(cate_debt, data, "Debt")

data <- debt_hetero$data

cat(" Debt模型异质性群体:\n")

print(debt_hetero$summary)

# Share模型异质性分析

share_hetero <- analyze_heterogeneity(cate_share, data, "Share")

data <- share_hetero$data

cat(" Share模型异质性群体:\n")

print(share_hetero$summary)

# 10. 变量重要性分析

cat("9. 变量重要性分析:\n")

analyze_importance <- function(model, covariates, model_name) {

var_importance <- variable_importance(model)

importance_df <- data.frame(

Variable = covariates,

Importance = round(var_importance, 4)

) %>% arrange(desc(Importance))

cat(" ", model_name, "变量重要性:\n")

print(importance_df)

return(importance_df)

}

# Debt模型变量重要性

debt_importance <- analyze_importance(

debt_results$model,

c("Share", base_covariates),

"Debt模型"

)

# Share模型变量重要性

share_importance <- analyze_importance(

share_results$model,

c("Debt", base_covariates),

"Share模型"

)

# 11. 保存结果

cat("10. 保存结果...\n")

output_columns <- c("Rose", "Debt", "Share", base_covariates,

"CATE_Debt", "CATE_Share", "Cluster_Debt", "Cluster_Share")

output_columns <- output_columns[output_columns %in% names(data)]

output_data <- data[, output_columns]

write.csv(output_data, "dual_treatment_causal_forest_results.csv", row.names = FALSE)

cat(" 结果已保存到: dual_treatment_causal_forest_results.csv\n")

# 12. 生成可视化 - 使用指定的颜色方案和线型

cat("11. 生成可视化图表...\n")

# 设置图形参数（移除字体加粗）

high_quality_theme <- function(base_size = 12, base_family = "") {

theme_minimal(base_size = base_size, base_family = base_family) +

theme(

plot.title = element_text(size = 14, hjust = 0.5),

plot.subtitle = element_text(size = 11, hjust = 0.5, color = "gray40"),

axis.title = element_text(size = 12),

axis.text = element_text(size = 10),

legend.title = element_text(size = 11),

legend.text = element_text(size = 10),

panel.grid.major = element_line(color = "gray90", linewidth = 0.2),

panel.grid.minor = element_blank(),

plot.margin = margin(1, 1, 1, 1, "cm")

)

}

# 定义颜色方案

blue_color <- "#1f77b4" # 蓝色

orange_color <- "#ff7f0e" # 橘色

# CATE分布对比图 - 使用蓝色和橘色，实线和虚线区分

cat(" 生成图表1: CATE分布对比...\n")

p1 <- ggplot(data) +

geom_density(aes(x = CATE_Debt, color = "Debt模型", linetype = "Debt模型"),

linewidth = 1.2, fill = blue_color, alpha = 0.1) +

geom_density(aes(x = CATE_Share, color = "Share模型", linetype = "Share模型"),

linewidth = 1.2, fill = orange_color, alpha = 0.1) +

labs(title = "双处理变量CATE分布对比",

subtitle = paste("Debt模型: 均值 =", round(mean(data$CATE_Debt), 4),

" | Share模型: 均值 =", round(mean(data$CATE_Share), 4)),

x = "条件平均处理效应(CATE)",

y = "密度",

color = "模型", linetype = "模型") +

scale_color_manual(values = c("Debt模型" = blue_color, "Share模型" = orange_color)) +

scale_linetype_manual(values = c("Debt模型" = "solid", "Share模型" = "dashed")) +

high_quality_theme() +

theme(legend.position = "top",

legend.box = "horizontal")

# 显示图片

print(p1)

# 保存图片

ggsave("CATE_distribution_comparison.png", p1,

width = 10, height = 6, dpi = 300, bg = "white")

# 变量重要性图 - Debt模型（使用蓝色）

cat(" 生成图表2: Debt模型变量重要性...\n")

p2 <- ggplot(debt_importance, aes(x = reorder(Variable, Importance), y = Importance)) +

geom_col(fill = blue_color, alpha = 0.8, width = 0.7) +

geom_text(aes(label = sprintf("%.4f", Importance)),

hjust = -0.1, size = 3.5, color = "darkblue") +

coord_flip() +

labs(title = "Debt模型变量重要性",

subtitle = paste("处理变量: Debt | 树数量:", debt_results$trees),

x = "变量", y = "重要性") +

high_quality_theme() +

expand_limits(y = max(debt_importance$Importance) * 1.15)

# 显示图片

print(p2)

# 保存图片

ggsave("Debt_variable_importance.png", p2,

width = 10, height = 6, dpi = 300, bg = "white")

# 变量重要性图 - Share模型（使用橘色）

cat(" 生成图表3: Share模型变量重要性...\n")

p3 <- ggplot(share_importance, aes(x = reorder(Variable, Importance), y = Importance)) +

geom_col(fill = orange_color, alpha = 0.8, width = 0.7) +

geom_text(aes(label = sprintf("%.4f", Importance)),

hjust = -0.1, size = 3.5, color = "darkred") +

coord_flip() +

labs(title = "Share模型变量重要性",

subtitle = paste("处理变量: Share | 树数量:", share_results$trees),

x = "变量", y = "重要性") +

high_quality_theme() +

expand_limits(y = max(share_importance$Importance) * 1.15)

# 显示图片

print(p3)

# 保存图片

ggsave("Share_variable_importance.png", p3,

width = 10, height = 6, dpi = 300, bg = "white")

# 关键变量重要性对比图

cat(" 生成图表4: 关键变量重要性对比...\n")

importance_combined <- rbind(

cbind(debt_importance, Model = "Debt模型"),

cbind(share_importance, Model = "Share模型")

)

# 找出每个模型前5个重要变量

top_debt <- head(arrange(debt_importance, desc(Importance)), 5)$Variable

top_share <- head(arrange(share_importance, desc(Importance)), 5)$Variable

top_variables <- unique(c(top_debt, top_share))

importance_filtered <- importance_combined %>%

filter(Variable %in% top_variables)

p4 <- ggplot(importance_filtered, aes(x = reorder(Variable, Importance), y = Importance, fill = Model)) +

geom_col(position = "dodge", alpha = 0.8, width = 0.7) +

geom_text(aes(label = sprintf("%.4f", Importance)),

position = position_dodge(width = 0.9),

hjust = -0.1, size = 3) +

coord_flip() +

labs(title = "关键变量重要性对比",

subtitle = "各模型前5重要变量",

x = "变量", y = "重要性") +

scale_fill_manual(values = c("Debt模型" = blue_color, "Share模型" = orange_color)) +

high_quality_theme() +

expand_limits(y = max(importance_filtered$Importance) * 1.2)

# 显示图片

print(p4)

# 保存图片

ggsave("Key_variables_comparison.png", p4,

width = 10, height = 7, dpi = 300, bg = "white")

# 额外图表：CATE散点图对比 - 使用蓝色，相关系数字体不加粗，回归线用断点线

cat(" 生成图表5: CATE散点图对比...\n")

# 计算相关系数

correlation <- cor(data$CATE_Debt, data$CATE_Share, use = "complete.obs")

cor_text <- paste("相关系数 r =", round(correlation, 4))

p5 <- ggplot(data, aes(x = CATE_Debt, y = CATE_Share)) +

geom_point(alpha = 0.6, color = blue_color, size = 2) +

# 使用断点线表示回归线

geom_smooth(method = "lm", color = orange_color, linewidth = 0.8, se = TRUE, linetype = "dashed") +

labs(title = "CATE散点图对比",

subtitle = "Debt模型CATE vs Share模型CATE",

x = "Debt模型CATE", y = "Share模型CATE") +

# 添加相关系数文本（移除字体加粗）

annotate("text", x = min(data$CATE_Debt, na.rm = TRUE),

y = max(data$CATE_Share, na.rm = TRUE),

label = cor_text,

hjust = 0, vjust = 1,

size = 5, color = "darkblue") + # 移除 fontface = "bold"

high_quality_theme()

# 显示图片

print(p5)

# 保存图片

ggsave("CATE_scatter_comparison.png", p5,

width = 9, height = 6, dpi = 300, bg = "white")

# 额外图表：CATE直方图对比 - 使用蓝色和橘色，实线和虚线区分

cat(" 生成图表6: CATE直方图对比...\n")

p6 <- ggplot(data) +

geom_histogram(aes(x = CATE_Debt, fill = "Debt模型", color = "Debt模型"),

alpha = 0.5, bins = 30, position = "identity", linewidth = 0.8, linetype = "solid") +

geom_histogram(aes(x = CATE_Share, fill = "Share模型", color = "Share模型"),

alpha = 0.5, bins = 30, position = "identity", linewidth = 0.8, linetype = "dashed") +

labs(title = "CATE直方图对比",

subtitle = "双处理变量条件平均处理效应分布",

x = "条件平均处理效应(CATE)",

y = "频数",

fill = "模型", color = "模型") +

scale_fill_manual(values = c("Debt模型" = blue_color, "Share模型" = orange_color)) +

scale_color_manual(values = c("Debt模型" = blue_color, "Share模型" = orange_color)) +

high_quality_theme() +

theme(legend.position = "top")

# 显示图片

print(p6)

# 保存图片

ggsave("CATE_histogram_comparison.png", p6,

width = 10, height = 6, dpi = 300, bg = "white")

# 13. 部分依赖图 (Partial Dependence Plots)

cat("12. 生成部分依赖图...\n")

# 函数：生成部分依赖图

generate_pdp <- function(model, data, feature_name, target_name, grid_size = 50, color = blue_color) {

# 创建特征值的网格

feature_range <- seq(min(data[[feature_name]], na.rm = TRUE),

max(data[[feature_name]], na.rm = TRUE),

length.out = grid_size)

# 准备数据用于预测

pdp_data <- data.frame()

for (val in feature_range) {

# 复制原始数据

temp_data <- data

# 将目标特征设置为当前值

temp_data[[feature_name]] <- val

# 准备预测矩阵（需要与训练时的矩阵结构一致）

if (target_name == "Debt") {

# 对于Debt模型，需要包含Share和所有基础协变量

temp_X <- as.matrix(temp_data[, c("Share", base_covariates)])

} else {

# 对于Share模型，需要包含Debt和所有基础协变量

temp_X <- as.matrix(temp_data[, c("Debt", base_covariates)])

}

# 预测CATE

predictions <- predict(model, temp_X)$predictions

# 计算平均CATE

avg_cate <- mean(predictions, na.rm = TRUE)

pdp_data <- rbind(pdp_data, data.frame(

feature_value = val,

cate = avg_cate

))

}

return(pdp_data)

}

# 生成Roa对Debt模型的部分依赖图

cat(" 生成图表7: Roa对Debt模型的部分依赖图...\n")

pdp_roa_debt <- generate_pdp(debt_results$model, data, "Roa", "Debt", color = blue_color)

p7 <- ggplot(pdp_roa_debt, aes(x = feature_value, y = cate)) +

geom_line(color = blue_color, linewidth = 1.2) +

geom_point(color = blue_color, size = 1.5) +

geom_ribbon(aes(ymin = cate - sd(cate), ymax = cate + sd(cate)),

alpha = 0.2, fill = blue_color) +

labs(title = "部分依赖图: Roa对Debt模型CATE的影响",

subtitle = "展示Roa变化对Debt处理效应的影响",

x = "Roa",

y = "平均CATE") +

high_quality_theme()

# 显示图片

print(p7)

# 保存图片

ggsave("PDP_Roa_Debt.png", p7, width = 10, height = 6, dpi = 300, bg = "white")

# 生成Lev对Share模型的部分依赖图

cat(" 生成图表8: Lev对Share模型的部分依赖图...\n")

pdp_lev_share <- generate_pdp(share_results$model, data, "Lev", "Share", color = orange_color)

p8 <- ggplot(pdp_lev_share, aes(x = feature_value, y = cate)) +

geom_line(color = orange_color, linewidth = 1.2) +

geom_point(color = orange_color, size = 1.5) +

geom_ribbon(aes(ymin = cate - sd(cate), ymax = cate + sd(cate)),

alpha = 0.2, fill = orange_color) +

labs(title = "部分依赖图: Lev对Share模型CATE的影响",

subtitle = "展示Lev变化对Share处理效应的影响",

x = "Lev",

y = "平均CATE") +

high_quality_theme()

# 显示图片

print(p8)

# 保存图片

ggsave("PDP_Lev_Share.png", p8, width = 10, height = 6, dpi = 300, bg = "white")

# 双变量部分依赖图对比

cat(" 生成图表9: 部分依赖图对比...\n")

pdp_combined <- rbind(

cbind(pdp_roa_debt, Model = "Debt模型(Roa)"),

cbind(pdp_lev_share, Model = "Share模型(Lev)")

)

p9 <- ggplot(pdp_combined, aes(x = feature_value, y = cate, color = Model, linetype = Model)) +

geom_line(linewidth = 1.2) +

geom_point(size = 1.5) +

labs(title = "部分依赖图对比",

subtitle = "Roa对Debt模型 vs Lev对Share模型",

x = "特征值",

y = "平均CATE") +

scale_color_manual(values = c("Debt模型(Roa)" = blue_color, "Share模型(Lev)" = orange_color)) +

scale_linetype_manual(values = c("Debt模型(Roa)" = "solid", "Share模型(Lev)" = "dashed")) +

high_quality_theme() +

theme(legend.position = "top")

# 显示图片

print(p9)

# 保存图片

ggsave("PDP_Comparison.png", p9, width = 10, height = 6, dpi = 300, bg = "white")

cat("=== 分析完成 ===\n")

# 13. 异质性群体特征对比分析

cat("13. 异质性群体特征对比分析...\n")

analyze_cluster_characteristics <- function(data, cluster_var, model_name) {

# 确定聚类标签（确保高效应组排在前面）

cluster_levels <- data %>%

group_by(.data[[cluster_var]]) %>%

summarise(mean_cate = mean(.data[[paste0("CATE_", model_name)]])) %>%

arrange(desc(mean_cate)) %>%

pull(.data[[cluster_var]])

data[[cluster_var]] <- factor(data[[cluster_var]], levels = cluster_levels)

# 选择要分析的变量

analysis_vars <- c("Rose", "Debt", "Share", base_covariates)

analysis_vars <- analysis_vars[analysis_vars %in% names(data)]

# 生成分组统计表

cluster_stats <- data %>%

group_by(.data[[cluster_var]]) %>%

summarise(

across(

all_of(analysis_vars),

list(

Mean = ~round(mean(., na.rm = TRUE), 4),

SD = ~round(sd(., na.rm = TRUE), 4)

),

.names = "{.col}_{.fn}"

),

Count = n(),

Proportion = round(n() / nrow(data), 3)

) %>%

arrange(.data[[cluster_var]])

return(list(stats = cluster_stats, data = data))

}

# Debt模型群体特征分析

cat(" Debt模型群体特征分析...\n")

debt_cluster_chars <- analyze_cluster_characteristics(data, "Cluster_Debt", "Debt")

data <- debt_cluster_chars$data

cat(" Debt模型各群体特征统计:\n")

print(debt_cluster_chars$stats)

# Share模型群体特征分析

cat(" Share模型群体特征分析...\n")

share_cluster_chars <- analyze_cluster_characteristics(data, "Cluster_Share", "Share")

data <- share_cluster_chars$data

cat(" Share模型各群体特征统计:\n")

print(share_cluster_chars$stats)

# 14. 生成群体特征对比可视化

cat("14. 生成群体特征对比可视化...\n")

# 函数：生成群体特征对比图

generate_cluster_comparison_plot <- function(data, cluster_var, model_name, key_variables, color_scheme) {

# 准备数据

plot_data <- data %>%

select(all_of(c(cluster_var, key_variables))) %>%

pivot_longer(cols = -all_of(cluster_var), names_to = "Variable", values_to = "Value")

# 生成图表

p <- ggplot(plot_data, aes(x = .data[[cluster_var]], y = Value, fill = .data[[cluster_var]])) +

geom_boxplot(alpha = 0.7, outlier.shape = NA) +

geom_jitter(width = 0.2, alpha = 0.3, size = 0.8) +

facet_wrap(~ Variable, scales = "free_y", ncol = 3) +

labs(

title = paste(model_name, "异质性群体特征对比"),

subtitle = "展示不同效应群体在关键变量上的分布差异",

x = "效应群体",

y = "变量值"

) +

scale_fill_manual(values = color_scheme) +

high_quality_theme() +

theme(

axis.text.x = element_text(angle = 45, hjust = 1),

legend.position = "none",

strip.text = element_text(size = 10, face = "bold")

)

return(p)

}

# 定义关键变量（根据变量重要性选择）

key_vars_debt <- head(debt_importance$Variable, 6) # 取前6个重要变量

key_vars_share <- head(share_importance$Variable, 6)

# 定义颜色方案

cluster_colors <- c("#1f77b4", "#ff7f0e", "#2ca02c") # 蓝色, 橘色, 绿色

# 生成Debt模型群体特征对比图

cat(" 生成图表10: Debt模型群体特征对比...\n")

p10 <- generate_cluster_comparison_plot(

data = data,

cluster_var = "Cluster_Debt",

model_name = "Debt模型",

key_variables = key_vars_debt,

color_scheme = cluster_colors

)

# 显示图片

print(p10)

# 保存图片

ggsave("Debt_cluster_characteristics.png", p10, width = 12, height = 8, dpi = 300, bg = "white")

# 生成Share模型群体特征对比图

cat(" 生成图表11: Share模型群体特征对比...\n")

p11 <- generate_cluster_comparison_plot(

data = data,

cluster_var = "Cluster_Share",

model_name = "Share模型",

key_variables = key_vars_share,

color_scheme = cluster_colors

)

# 显示图片

print(p11)

# 保存图片

ggsave("Share_cluster_characteristics.png", p11, width = 12, height = 8, dpi = 300, bg = "white")

# 15. 生成雷达图展示群体特征（可选）

cat("15. 生成雷达图展示群体特征...\n")

generate_radar_plot <- function(cluster_stats, model_name, top_n = 5) {

# 选择最重要的变量进行雷达图展示

if (model_name == "Debt") {

important_vars <- head(debt_importance$Variable, top_n)

} else {

important_vars <- head(share_importance$Variable, top_n)

}

# 提取均值数据

mean_vars <- paste0(important_vars, "_Mean")

radar_data <- cluster_stats$stats %>%

select(Cluster = 1, all_of(mean_vars))

# 标准化数据（0-1范围）

radar_data_scaled <- as.data.frame(lapply(radar_data[-1], function(x) {

(x - min(x)) / (max(x) - min(x))

}))

radar_data_scaled$Cluster <- radar_data$Cluster

# 转换数据格式

radar_long <- radar_data_scaled %>%

pivot_longer(cols = -Cluster, names_to = "Variable", values_to = "Value") %>%

mutate(Variable = gsub("_Mean", "", Variable))

# 生成雷达图

p <- ggplot(radar_long, aes(x = Variable, y = Value, group = Cluster, color = Cluster)) +

geom_polygon(aes(fill = Cluster), alpha = 0.1, size = 1) +

geom_point(size = 2) +

coord_polar() +

labs(

title = paste(model_name, "模型群体特征雷达图"),

subtitle = paste("基于前", top_n, "个重要变量的标准化值"),

x = "",

y = ""

) +

scale_color_manual(values = cluster_colors) +

scale_fill_manual(values = cluster_colors) +

high_quality_theme() +

theme(

axis.text.y = element_blank(),

axis.ticks.y = element_blank(),

panel.grid.major = element_line(color = "gray80"),

legend.position = "right"

)

return(p)

}

# 生成Debt模型雷达图

cat(" 生成图表12: Debt模型群体特征雷达图...\n")

p12 <- generate_radar_plot(debt_cluster_chars, "Debt", top_n = 5)

# 显示图片

print(p12)

# 保存图片

ggsave("Debt_cluster_radar.png", p12, width = 10, height = 8, dpi = 300, bg = "white")

# 生成Share模型雷达图

cat(" 生成图表13: Share模型群体特征雷达图...\n")

p13 <- generate_radar_plot(share_cluster_chars, "Share", top_n = 5)

# 显示图片

print(p13)

# 保存图片

ggsave("Share_cluster_radar.png", p13, width = 10, height = 8, dpi = 300, bg = "white")

# 16. 保存详细的群体特征分析结果

cat("16. 保存详细的群体特征分析结果...\n")

# 创建详细的结果汇总

cluster_analysis_summary <- list(

Debt_Model = list(

Cluster_Summary = debt_hetero$summary,

Variable_Importance = debt_importance,

Cluster_Characteristics = debt_cluster_chars$stats

),

Share_Model = list(

Cluster_Summary = share_hetero$summary,

Variable_Importance = share_importance,

Cluster_Characteristics = share_cluster_chars$stats

)

)

# 保存为CSV文件

write.csv(debt_cluster_chars$stats, "debt_cluster_characteristics.csv", row.names = FALSE)

write.csv(share_cluster_chars$stats, "share_cluster_characteristics.csv", row.names = FALSE)

cat(" 群体特征分析结果已保存到CSV文件\n")

# 17. 输出关键发现总结

cat("17. 关键发现总结:\n")

summarize_key_findings <- function(cluster_chars, importance_df, model_name) {

cat(" ", model_name, "模型关键发现:\n")

# 找出高效应群体

high_effect_cluster <- cluster_chars$stats[1, 1]

cat(" - 高效应群体:", high_effect_cluster[[1]], "\n")

# 找出最重要的变量

top_var <- importance_df$Variable[1]

cat(" - 最重要调节变量:", top_var, "(重要性:", importance_df$Importance[1], ")\n")

# 比较高低效应群体的关键差异

if (nrow(cluster_chars$stats) >= 2) {

high_group <- cluster_chars$stats[1, ]

low_group <- cluster_chars$stats[nrow(cluster_chars$stats), ]

# 找出差异最大的变量

diff_vars <- c()

for (var in base_covariates) {

mean_var <- paste0(var, "_Mean")

if (mean_var %in% names(high_group) && mean_var %in% names(low_group)) {

diff <- abs(high_group[[mean_var]] - low_group[[mean_var]])

diff_vars <- c(diff_vars, setNames(diff, var))

}

}

if (length(diff_vars) > 0) {

max_diff_var <- names(which.max(diff_vars))

cat(" - 群体间差异最大的变量:", max_diff_var, "(差异:", round(max(diff_vars), 4), ")\n")

}

}

cat("\n")

}

# 输出总结

summarize_key_findings(debt_cluster_chars, debt_importance, "Debt")

summarize_key_findings(share_cluster_chars, share_importance, "Share")

cat("=== 异质性群体特征分析完成 ===\n")
