# Supplementary material
Source: Research Square preprint supplement (doi:10.21203/rs.3.rs-9212289/v1)
Supplement: Supplementary file 4 [file cc2f694db4cd7200e8b3f2eb.xlsx]

## Sheet: Sheet1
Rose	Debt	Share	Roa	Fixed	Liquid	Board	Size	Life	Soe	Bm	Gro	Lev
3.96022	0.471873	0.662385	-0.135269	0.09305	2.55585	2.3979	21.7638	1	0	0.124135	0.464143	0.521308
3.98217	0.388593	0.246795	0.027655	0.104835	2.18089	2.30259	21.6574	3	0	0.23118	2.36287	0.45875
4.03949	0.390444	0.357148	0.0235143	0.101779	1.25185	2.19722	21.6602	3	0	0.338225	-0.586824	0.457423
4.02482	0.372808	0.195609	-0.0270203	0.184353	1.07811	2.48491	21.736	2	0	0.535593	-0.786148	0.509575
3.99783	0.457761	0.543108	0.0128233	0.112199	1.50424	2.56495	21.607	3	1	0.449228	0.83955	0.468859
4.12633	0.56105	0.269452	-0.0431937	0.123141	1.65939	2.48491	21.4961	1	1	0.478224	0.016149	0.436977
4.07957	0.591901	0.755509	-0.0691357	0.226841	1.7295	2.30259	21.3731	2	1	0.332457	-0.059511	0.41726
4.08016	0.562538	0.715907	-0.026694	0.134734	1.85464	2.48491	21.3293	1	1	0.410314	2.55298	0.41232
4.17498	0.591901	0.797148	0.0414877	0.288855	3.04925	3.19722	21.4155	1	1	0.443785	2.94333	0.36344
3.96443	0.198094	0.249723	0.109203	0.101521	2.49785	2.30259	21.2786	3	0	0.257937	-0.120002	0.219564
3.99273	0.500908	0.36674	0.030684	0.081633	1.94127	2.19722	22.8439	2	0	0.54224	0.759078	0.695448
4.23846	0.426469	0.552254	0.0664903	0.093525	1.80391	2.56495	22.7654	3	0	0.613221	-0.045663	0.64059
4.23846	0.302108	0.454174	0.07642	0.066926	1.39433	2.30259	23.0534	2	0	1.00562	0.068862	0.51104
4.23846	0.252408	0.295672	-0.143999	0.081204	1.45167	2.19722	22.8201	3	0	0.911854	0.062031	0.496239
4.12009	0.243876	0.395173	0.0574913	0.080141	1.59749	2.3979	22.7676	1	0	0.7058	-0.083026	0.444163
4.23846	0.520908	0.801148	0.0387793	0.074334	1.62129	2.19722	22.7663	3	0	0.882614	-0.193983	0.422144
3.87425	0.444474	0.682625	-0.136179	0.08654	1.55005	2.30259	22.6799	1	0	0.858466	-0.157587	0.446345
3.87425	0.44053	0.55674	-0.008058	0.09204	1.16069	2.2079	22.6911	3	0	0.892919	-0.042847	0.453139
3.98816	0.0102758	0.366439	-0.0588493	0.133711	1.75387	2.83321	21.9553	1	1	0.517754	0.308793	0.407609
3.9791	0.0190189	0.461231	0.115822	0.11657	1.99572	2.83321	22.0023	2	0	0.409157	0.426669	0.341601
3.98515	0.0142531	0.374393	0.0275803	0.18835	1.83795	2.56495	22.0889	3	0	0.376054	0.397302	0.355843
4.08544	0.020247	0.615906	0.011692	0.191478	1.61522	2.56495	22.1972	1	0	0.727185	-0.340139	0.423726
4.05346	0.0328284	0.605689	0.04995	0.171153	1.65205	2.19722	22.2735	1	0	0.670141	-0.14574	0.432672
4.05825	0.0328284	0.743881	0.0563647	0.160334	1.72166	2.19722	22.2543	3	0	0.341289	-0.169403	0.419488
4.05226	0.0712828	0.745649	0.0626873	0.130497	1.69379	2.63906	22.3553	1	0	0.599173	-0.343699	0.4106
4.07411	0.0852041	0.753663	0.086709	0.156397	1.70472	2.19722	22.6305	1	0	0.574768	-0.384303	0.478164
4.09998	0.092645	0.821967	0.0778783	0.150938	2.18715	2.99722	22.8592	2	0	0.820945	-0.168328	0.47482
3.97606	0.00769733	0.592435	-0.0674367	0.308834	1.01483	2.3979	20.9958	2	0	0.25215	0.447271	0.62978
3.98444	0.0795589	0.557559	0.0142997	0.317178	1.04606	2.63906	21.0548	2	0	0.225595	0.172763	0.618203
4.1427	0.0758516	0.450158	0.0400663	0.325522	1.0773	2.3979	21.0976	1	0	0.442175	-0.101745	0.606626
4.11358	0.0738628	0.144985	-0.00656867	0.323461	1.00811	2.3979	21.2281	1	0	0.648681	0.179664	0.656327
4.06467	0.0837388	0.752254	0.019289	0.292919	1.10175	2.63906	21.219	2	0	0.509805	-0.080098	0.637188
4.06749	0.0878691	0.799051	0.135343	0.227584	1.2642	2.3979	21.3302	2	0	0.482543	-0.158236	0.612313
4.04559	0.0722077	0.711099	0.190576	0.281604	1.37073	2.48491	21.5485	2	0	0.454666	0.12385	0.586584
4.01621	0.0779097	0.713024	0.134924	0.307213	1.01513	2.3979	21.3736	1	0	0.55143	-0.144998	0.440379
4.00006	0.0752025	0.518439	0.01263	0.301202	1.70231	2.3979	21.2514	1	0	0.549918	0.042488	0.419825
4.00606	0.415367	0.620769	0.292505	0.154273	2.33059	2.19722	21.7965	1	0	0.444964	0.27499	0.25189
4.01216	0.195188	0.681552	0.198848	0.150762	1.09988	2.19722	22.2717	2	0	0.419283	0.063113	0.421656
3.99543	0.155077	0.733885	0.150496	0.105344	1.46532	2.56495	22.6158	2	0	0.393602	0.064382	0.38691
3.99024	0.141156	0.565556	0.190781	0.097509	1.33046	2.63906	22.7156	2	0	0.459019	0.146052	0.385447
3.98332	0.233005	0.518487	0.0411173	0.078301	1.15168	2.3979	22.9123	3	0	0.438796	-0.366103	0.445896
4.0007	0.165849	0.760253	-0.0285927	0.083727	1.49326	2.3979	22.8742	1	0	0.618782	-0.189233	0.411173
4.00124	0.366911	0.646192	0.0292453	0.095907	2.30051	2.70805	22.6609	1	0	0.4407	-0.076539	0.26091
4.03874	0.36075	0.754247	-0.128737	0.10013	2.37389	2.48491	22.5604	1	0	0.614815	0.18565	0.276916
4.05714	0.474628	0.801705	0.0199137	0.196764	2.32187	2.48491	22.5185	2	0	0.506504	0.339834	0.2329
3.99095	0.0711716	0.432132	0.0127163	0.325031	1.10661	2.70805	21.438	3	0	0.274626	0.421647	0.48782
3.99189	0.0883711	0.531178	0.0239567	0.259847	2.7837	2.48491	21.6127	3	0	0.390439	0.29739	0.247145
3.9899	0.0711716	0.534307	0.007758	0.292607	3.62374	2.19722	21.4699	3	0	0.462845	0.279182	0.164824
3.99142	0.0843711	0.417714	0.00895	0.288657	3.20606	2.19722	21.4495	1	0	0.563826	0.381528	0.178888
3.98953	0.0846851	0.436688	0.0317557	0.255163	3.98649	2.77259	21.4763	2	0	0.58213	0.307967	0.154984
3.9893	0.0877711	0.581515	0.0243907	0.218485	3.70019	2.56495	21.4833	3	0	0.602858	0.160401	0.169687
3.99015	0.0710268	0.491161	0.0121263	0.177206	2.71695	2.19722	21.6061	1	0	0.629918	0.666712	0.262199
3.99052	0.0804188	0.607419	-0.0310193	0.160349	2.15368	2.19722	21.6221	2	0	0.608811	0.212315	0.299303
4.02186	0.0811131	0.562613	-0.0124117	0.18864	1.44997	1.94591	21.8486	2	0	0.203421	-0.059878	0.460747
4.00831	0.0203724	0.698519	0.01914	0.488352	8.73985	2.07944	20.9081	1	0	0.333539	0.19397	0.069407
3.99024	0.0127805	0.709505	0.0662927	0.433125	8.18334	1.79176	20.9649	2	0	0.306041	-0.114352	0.075564
4.10142	0.00988101	0.446479	0.121247	0.321219	3.37967	1.79176	21.1806	2	0	0.280769	0.327508	0.148888
4.15637	0.016737	0.784318	0.132883	0.512601	2.79132	1.94591	21.3803	3	0	0.619011	0.254877	0.167499
4.11798	0.0126683	0.619821	0.0744057	0.52316	3.64134	1.79176	21.3692	2	0	0.651227	-0.013036	0.131633
4.01527	0.282346	0.676573	0.076566	0.455694	3.31212	1.79176	21.4951	2	0	0.733955	-0.09237	0.161723
4.02424	0.382517	0.607419	0.070867	0.41392	3.6333	2.19722	21.55	1	0	0.702186	0.064896	0.143901
4.11292	0.200911	0.719791	0.0746057	0.40092	4.19232	1.79176	21.6088	3	0	0.746871	0.145538	0.132487
4.11404	0.284546	0.756155	-0.0159463	0.39522	4.71747	1.79176	21.5765	1	0	0.772572	-0.242041	0.127324
3.98524	0.0595968	0.437706	-0.0907043	0.483504	2.01296	2.30259	21.1985	3	0	0.28023	-0.178158	0.421157
3.97789	0.0575225	0.2942	0.00171	0.491226	1.86728	2.83321	21.2131	2	0	0.182155	-0.264312	0.425946
4.12883	0.0463348	0.451157	0.0155317	0.224865	3.27487	2.83321	21.1146	3	0	0.297159	0.044295	0.352762
4.09207	0.0502276	0.58608	0.019186	0.281534	3.64139	2.63906	20.8179	3	0	0.329349	0.117223	0.144996
4.04368	0.0563816	0.435896	-0.0203123	0.26289	3.5194	2.63906	20.8094	1	0	0.376356	-0.015939	0.160872
4.10846	0.0641324	0.424641	0.0208223	0.219737	2.86629	2.63906	20.9278	1	0	0.408797	0.01581	0.249261
4.0556	0.0683051	0.634307	0.022708	0.223559	3.24306	2.48491	20.8957	1	0	0.433028	-0.00163	0.215686
4.02285	0.061742	0.58754	0.100688	0.209863	3.52672	2.30259	20.9565	2	0	0.413916	-0.168239	0.202028
4.02309	0.0696075	0.530883	0.056006	0.213525	4.39946	2.48491	20.9294	3	0	0.46866	-0.033089	0.156807
3.97854	0.0211776	0.564613	0.116338	0.180804	1.53612	2.3979	22.4829	1	0	0.250926	2.94333	0.417818
3.99516	0.0377812	0.554961	0.00923	0.158776	1.37151	2.30259	22.5993	1	0	0.366616	2.06101	0.482801
4.11063	0.0443216	0.682744	0.0121093	0.142788	1.42687	2.19722	22.8554	2	0	0.500873	2.77059	0.605005
4.11419	0.0532783	0.754842	-0.0157037	0.140341	1.17309	2.19722	22.6371	2	0	0.758327	2.94333	0.521737
4.04539	0.0367841	0.486857	0.0973073	0.125549	1.31524	2.48491	22.6473	3	0	0.598386	2.94333	0.446583
3.99647	0.0366244	0.754901	0.0981013	0.107902	1.46497	2.19722	22.7117	2	0	0.649055	2.94333	0.469506
4.04147	0.0335847	0.748249	0.0189273	0.084684	1.2217	2.19722	22.9706	1	0	0.723659	2.51467	0.620725
4.07884	0.0441571	0.708529	0.0245643	0.093065	1.2733	2.19722	22.8453	2	0	0.686874	2.94333	0.57327
4.00381	0.0368588	0.525607	0.00642467	0.1089	1.43925	2.19722	22.6716	2	0	0.734461	2.94333	0.47864
3.98275	0.268905	0.701217	0.36285	0.005442	6.79273	2.48491	21.027	2	0	0.466592	-0.143139	0.161709
3.99299	0.155276	0.632046	0.305162	0.004443	4.89636	2.48491	22.1242	1	0	0.359264	0.081759	0.165426
4.10565	0.432776	0.745809	0.36285	0.003444	2.99998	1.94591	22.5323	2	0	0.79344	0.306657	0.169143
4.04788	0.159748	0.772282	0.0742873	0.004017	2.70952	2.70805	22.5332	2	0	0.661246	-0.127525	0.156154
4.03377	0.0519119	0.466972	-0.528818	0.005951	3.02321	2.83321	22.07	1	0	0.408706	0.178286	0.2448
4.04623	0.0539155	0.481254	0.088463	0.004393	4.01287	2.30259	21.9887	1	0	0.396862	0.36414	0.151225
4.11079	0.30658	0.603684	0.27657	0.003586	4.69172	2.3979	22.2048	3	0	0.405048	0.094956	0.147867
4.08997	0.282263	0.668201	0.346096	0.003655	3.28651	2.19722	22.4771	3	0	0.283708	0.103642	0.213652
3.97958	0.0236855	0.771432	0.334882	0.002641	3.37109	2.30259	22.6119	1	0	0.162368	0.202132	0.207539
4.04699	0.0182116	0.444082	0.295784	0.053104	0.407657	2.19722	22.2544	2	0	0.394457	0.305992	0.314425
4.02973	0.0143371	0.357357	0.284526	0.042512	1.50872	2.3979	22.5774	3	0	0.42054	0.275548	0.259475
4.0846	0.018038	0.498867	0.30309	0.03192	2.60977	2.19722	22.9381	1	0	0.314956	0.245104	0.204525
4.08444	0.0182116	0.472866	0.176888	0.004342	2.0992	2.19722	22.851	3	0	0.511853	-0.06023	0.271811
4.09557	0.0476778	0.51353	0.34011	0.004643	2.44392	2.56495	23.0403	1	0	0.246987	0.051113	0.281072
4.10654	0.0488148	0.595146	0.36285	0.087345	1.28937	2.19722	23.0807	3	0	0.21394	-0.057768	0.425856
4.15808	0.0466603	0.69706	0.293786	0.061785	2.70254	2.07944	23.3931	3	0	0.29887	-0.101905	0.24796
4.05516	0.0310451	0.402531	0.241297	0.049725	2.43848	2.3979	23.562	3	0	0.454422	0.318506	0.279777
4.04528	0.0390249	0.464822	0.191258	0.043038	1.88343	2.19722	23.6748	1	0	0.47737	0.051728	0.330407
3.99105	0.11601	0.210232	0.115456	0.202704	1.96759	2.19722	22.3468	1	0	0.229015	-0.112436	0.21249
4.0043	0.154323	0.222235	0.126646	0.198144	1.90801	2.19722	22.4287	1	0	0.180186	0.083757	0.200676
4.07821	0.600633	0.466972	0.17246	0.184401	1.78599	2.30259	22.5817	1	0	0.21687	0.243395	0.20528
4.11624	0.753304	0.476036	0.102177	0.068831	3.38092	2.30259	23.5414	3	0	0.471416	-0.187355	0.17088
4.14625	0.834232	0.652615	0.131309	0.037944	1.39596	2.19722	24.2002	3	0	0.632426	-0.061213	0.231476
4.13797	0.715107	0.721212	0.102338	0.028467	1.31337	2.19722	24.3435	1	0	0.753634	-0.196827	0.299412
4.08968	0.611053	0.56911	0.0815657	0.036359	1.24144	2.63906	24.3435	1	0	0.6568	-0.095912	0.208863
4.04812	0.364688	0.45261	-0.262472	0.03738	1.60759	2.19722	24.2292	1	0	0.930349	-0.132962	0.239048
4.1306	0.725917	0.656467	0.0218857	0.044925	1.35509	2.70805	24.3435	1	0	0.764412	-0.064378	0.304127
3.9738	0.34157	0.390833	0.160798	0.035683	3.34372	2.63906	21.8321	3	0	0.731866	1.42352	0.492497
4.01394	0.259188	0.476695	0.136934	0.03227	2.65417	2.30259	23.5143	1	0	0.690193	0.832958	0.481347
4.16749	0.641176	0.227723	0.118138	0.028857	1.96463	1.60944	23.5318	3	0	0.64852	0.242392	0.470197
4.14445	0.619148	0.593492	0.144764	0.022677	2.74993	1.60944	23.4945	1	0	0.61214	0.365331	0.417403
4.04844	0.434799	0.275179	0.11777	0.02189	2.11103	1.60944	23.5344	1	0	0.282999	0.032936	0.390913
3.97713	0.305398	0.384806	0.125955	0.022831	1.87563	2.07944	23.4646	1	0	0.267391	-0.258947	0.278878
3.98008	0.318943	0.623538	0.0143687	0.022332	1.73622	2.07944	23.5588	2	0	0.385015	-0.297842	0.383526
4.03695	0.313676	0.505444	0.115503	0.021722	1.54924	1.60944	23.4728	2	0	0.522002	0.095531	0.39395
4.07224	0.592471	0.66711	0.0520827	0.022162	1.96569	1.60944	23.3966	1	0	0.531753	-0.080948	0.349501
4.01596	0.234522	0.278698	0.0638803	0.204321	1.34692	2.19722	21.7433	2	0	0.223447	0.298983	0.444351
4.02274	0.413672	0.273395	0.134422	0.1719	3.16306	2.48491	21.8549	3	0	0.342118	0.184025	0.296992
4.13923	0.402945	0.472148	0.191376	0.149419	3.90107	2.48491	21.9246	1	0	0.273981	0.531523	0.250737
4.18162	0.468997	0.402387	0.223324	0.101007	2.4017	2.30259	22.2465	3	0	0.517719	0.060595	0.341471
4.08635	0.445255	0.662116	0.129958	0.110666	2.34362	2.30259	22.2705	2	0	0.341368	0.205734	0.371134
4.01739	0.243775	0.65732	0.255229	0.11421	1.94093	2.19722	22.3628	3	0	0.223726	-0.025663	0.322235
4.18059	0.492892	0.670087	0.186719	0.203432	3.24648	2.30259	22.4893	2	0	0.276715	-0.017328	0.311364
4.09505	0.47569	0.52478	0.0588637	0.208659	2.07014	2.63906	22.4019	2	0	0.373785	-0.048807	0.316969
4.12281	0.461717	0.512066	0.0686603	0.217209	3.07933	2.19722	22.401	1	0	0.470576	0.016782	0.264674
3.97049	0.0893957	0.464817	0.109647	0.122081	2.69137	2.30259	20.721	3	0	0.47552	0.713461	0.283642
3.99448	0.0780684	0.598737	0.125909	0.174044	1.52392	2.30259	21.2175	3	0	0.470856	0.333152	0.463371
4.2143	0.251297	0.709669	0.139479	0.275339	1.31768	2.56495	21.5045	1	0	0.511078	0.185091	0.510548
4.16308	0.207453	0.746626	0.136193	0.196709	1.71148	1.94591	22.0199	2	0	0.634339	0.499119	0.420867
4.07625	0.104832	0.715037	0.121945	0.177225	1.5466	1.94591	22.3046	3	0	0.660862	0.959232	0.488287
4.09234	0.133374	0.654901	0.18913	0.217039	2.11758	2.07944	22.421	2	0	0.613508	0.052906	0.411438
4.16174	0.175127	0.763185	0.106815	0.209451	1.67124	1.94591	23.0167	2	0	0.892699	0.256142	0.476562
4.16579	0.208634	0.685095	0.082755	0.173424	1.6062	1.94591	23.269	3	0	0.908537	-0.276424	0.537262
4.18126	0.250538	0.729302	0.049965	0.177567	1.62049	2.19722	23.4349	2	0	1.02529	0.007577	0.576172
4.05456	0.211143	0.527039	0.114475	0.028248	6.01799	1.94591	19.8756	3	0	0.306705	0.657821	0.159166
4.09915	0.311112	0.509597	0.10208	0.02414	5.1098	1.94591	19.9953	3	0	0.174024	0.531968	0.188362
4.15828	0.267935	0.673473	-0.025595	0.013676	4.89372	2.70805	20.5267	2	0	0.40848	0.406115	0.227154
4.14374	0.182952	0.612066	0.007383	0.138164	3.5738	2.19722	20.5854	3	0	0.631111	0.590348	0.266631
4.03326	0.150497	0.464822	-0.045216	0.246812	3.06477	2.19722	20.5372	2	0	0.357102	0.586789	0.260102
4.03981	0.0707762	0.402526	-0.111228	0.280995	2.14418	2.19722	20.5007	1	0	0.314256	1.13423	0.308892
4.04442	0.242524	0.688636	-0.036166	0.251459	2.48364	2.48491	20.7344	2	0	0.365437	1.12134	0.291645
4.02142	0.230986	0.507197	-0.049194	0.230915	1.97534	1.94591	20.7915	2	0	0.468354	0.621983	0.361452
4.02372	0.169604	0.418049	0.0277467	0.2078	1.99207	2.19722	20.8232	1	0	0.51318	0.69156	0.360198
3.92125	0.311885	0.49552	0.193509	0.003517	3.82491	1.94591	20.9494	2	0	0.619344	0.203726	0.22993
3.96306	0.389995	0.457988	0.152891	0.002483	7.21991	1.94591	21.1109	3	0	0.53167	0.164551	0.128729
4.10373	0.60112	0.652809	0.147151	0.00316	5.20726	2.19722	21.2724	2	0	0.443996	0.125376	0.166912
4.06458	0.498664	0.414615	0.197743	0.004274	3.78122	1.94591	21.4744	1	0	0.523546	0.086201	0.231287
4.02051	0.40112	0.48132	0.228808	0.086762	3.55131	2.19722	21.6493	3	0	0.390593	0.050759	0.224211
4.01647	0.474296	0.574965	0.203387	0.063815	4.61383	2.19722	22.0446	2	0	0.485764	0.073989	0.355029
4.05165	0.310463	0.755534	0.187856	0.050245	3.36931	2.07944	22.3049	1	0	0.40263	-0.00999	0.332421
4.07866	0.59762	0.627797	0.182835	0.082724	3.25829	2.07944	22.4423	1	0	0.438151	-0.275907	0.259443
4.01363	0.438636	0.595526	0.193136	0.08631	2.79837	2.07944	22.6295	3	0	0.427688	-0.334614	0.271999
3.94927	0.0111998	0.385533	0.116871	0.061522	2.09596	1.60944	19.7029	3	0	0.526341	-0.814258	0.437651
4.00378	0.0155596	0.322461	0.107763	0.046728	1.89014	1.94591	20.045	3	0	0.5421	-0.386355	0.503376
4.17423	0.0511993	0.409164	0.15507	0.030593	3.67471	2.3979	20.387	2	0	0.557859	0.100048	0.266969
4.10783	0.0466218	0.520908	0.147067	0.007371	2.17658	1.94591	20.729	2	0	0.573618	0.586451	0.36484
4.05574	0.0411822	0.678995	0.147714	0.006922	1.87011	1.94591	21.0042	3	0	0.579305	0.553454	0.441876
4.05214	0.041189	0.429987	0.177784	0.009002	2.06473	2.30259	21.0983	3	0	0.317902	0.122287	0.407284
4.03196	0.0185434	0.476245	0.113205	0.00847	1.83822	2.07944	21.2905	2	0	0.37861	0.422871	0.471041
4.05966	0.0278722	0.460806	0.11986	0.008555	2.0322	2.07944	21.3085	1	0	0.460089	0.369639	0.422688
4.04112	0.0194156	0.439769	0.015576	0.005936	2.17566	2.30259	21.698	3	0	0.536899	-0.162638	0.405848
3.90833	0.309482	0.386082	0.119649	0.29566	1.67263	2.19722	20.8397	1	0	0.546369	0.642852	0.415997
3.91068	0.45512	0.307748	0.127182	0.266051	1.74917	2.19722	20.8814	1	0	0.606084	0.55961	0.376523
4.0705	0.325364	0.717638	0.109468	0.147425	3.55125	2.19722	20.923	3	0	0.665799	0.476368	0.220802
4.14374	0.511189	0.603703	0.066681	0.150267	3.58886	2.19722	20.9647	3	0	0.725514	0.393126	0.210141
4.15479	0.534392	0.550102	0.0532743	0.141503	4.56939	2.30259	20.9549	1	0	0.750835	0.309884	0.171271
4.1485	0.634392	0.590522	0.0398547	0.120812	3.81385	2.56495	21.0321	1	0	0.740178	0.368063	0.20375
4.13784	0.599794	0.672369	0.0143753	0.088398	4.27982	2.30259	21.2984	2	0	0.703335	0.294558	0.382729
4.07204	0.615802	0.558196	0.0452767	0.063404	2.69613	2.19722	21.4313	3	0	0.855718	0.354343	0.42849
4.02751	0.595248	0.557727	0.053578	0.074601	2.06874	2.63906	21.5539	3	0	0.754852	-0.101161	0.459326
3.91145	0.166655	0.4361	0.0678537	0.058111	2.89265	2.48491	22.4993	3	0	0.342647	0.433434	0.156048
3.91394	0.1494	0.489399	0.0947473	0.061309	1.82205	2.77259	22.6736	3	0	0.445842	0.137134	0.283951
4.04389	0.167092	0.57863	0.018581	0.061113	1.90277	2.3979	22.6583	1	0	0.588573	-0.113207	0.257725
4.20363	0.24449	0.65538	0.01559	0.061548	1.82465	2.48491	22.6156	3	0	0.881495	1.6055	0.211728
4.16526	0.221196	0.73991	-0.33933	0.07353	1.34583	2.48491	22.3877	2	0	0.710655	0.627374	0.290779
4.09849	0.245611	0.551462	0.0835377	0.072581	1.58437	2.07944	22.37	2	0	0.507447	0.390251	0.237785
4.1053	0.203809	0.498318	0.0932273	0.072588	2.20046	2.19722	22.3811	1	0	0.432922	0.35468	0.17428
4.07783	0.203513	0.466878	0.126711	0.041514	2.94471	2.30259	22.4842	3	0	0.63139	0.360457	0.166397
4.04128	0.208756	0.539213	0.182639	0.050188	3.88461	1.94591	22.6406	1	0	0.387963	0.367497	0.149352
4.11722	0.0717269	0.625577	0.147168	0.088057	1.65935	2.07944	21.6891	1	0	0.275831	0.475005	0.397269
4.03533	0.08076	0.335486	0.0461777	0.062558	3.58696	2.19722	22.0128	1	0	0.471974	0.922898	0.202314
4.11603	0.122028	0.580574	-0.0460683	0.075606	3.78167	2.3979	21.9126	1	0	0.668117	0.592111	0.20111
4.1118	0.126433	0.565867	-0.101611	0.076507	5.63128	2.07944	21.7515	2	0	0.872849	1.05295	0.153842
4.04279	0.38372	0.666245	0.0492073	0.063464	5.53294	2.30259	21.7881	1	0	0.723195	0.775209	0.15686
3.95231	0.0422563	0.318841	-0.143006	0.074858	7.50934	2.70805	21.5986	1	0	0.456037	1.67468	0.117196
4.04906	0.0745132	0.674214	0.0289433	0.072211	6.5654	2.77259	21.6495	1	0	0.277012	1.34587	0.141777
4.03807	0.0546725	0.383047	0.0276193	0.088544	4.58714	1.94591	21.6925	2	0	0.363578	0.376487	0.209274
4.00499	0.0152522	0.354177	0.021631	0.08749	3.7174	1.94591	21.6926	2	0	0.413131	0.227435	0.201411
4.00397	0.0345998	0.336892	0.0913687	0.281849	4.97993	2.19722	20.7638	1	0	0.141512	0.048034	0.121371
3.9943	0.0199696	0.623739	0.11546	0.09317	3.7789	2.19722	21.8554	3	0	0.48771	0.081381	0.137412
4.23846	0.175559	0.443725	0.0996377	0.082852	2.04369	2.07944	21.8881	3	0	0.583171	-0.035791	0.266561
4.1562	0.272584	0.535455	0.119505	0.075831	2.22857	2.30259	21.8976	1	0	0.630365	0.107934	0.289089
4.09118	0.108702	0.620378	0.102695	0.058091	1.70329	2.19722	22.1146	1	0	0.59783	0.204428	0.343241
4.06238	0.228597	0.597398	0.131224	0.047177	1.59097	2.30259	22.2849	2	0	0.558139	0.073828	0.352675
4.04535	0.0638438	0.722566	0.0995257	0.139619	1.49557	2.3979	22.4028	2	0	0.466154	0.235496	0.273845
4.02965	0.132454	0.629509	-0.11667	0.176914	1.47677	2.07944	22.4006	3	0	0.745057	0.010385	0.343637
4.04999	0.164883	0.595678	0.0262777	0.160757	1.51959	2.07944	22.4817	2	0	0.641648	0.4182	0.348436
3.99225	0.62622	0.304296	0.171481	0.220754	1.12769	2.07944	21.9175	1	0	0.251305	0.151255	0.497127
3.99597	0.514877	0.344931	0.137819	0.194646	0.920769	2.07944	22.3568	2	0	0.441923	0.023291	0.529919
4.16441	0.545261	0.633765	0.0583767	0.168538	0.713843	2.19722	22.5116	2	0	0.632541	-0.104673	0.562711
4.09449	0.463616	0.619713	0.0538297	0.220863	0.647852	1.94591	22.5076	1	0	0.862671	-0.035262	0.535756
4.06613	0.277932	0.580574	0.0596533	0.225917	0.586173	2.19722	22.4707	3	0	0.694423	-0.429778	0.486492
3.9741	0.263352	0.625577	0.00630633	0.237861	0.449841	2.19722	22.4022	2	0	0.843811	-0.196779	0.451719
3.96594	0.287356	0.412669	-0.183796	0.255849	0.288224	2.19722	22.2284	1	0	0.714439	0.077187	0.527682
4.05568	0.60915	0.49654	-0.0943927	0.269582	0.365112	1.94591	22.1887	1	0	0.757534	-0.41441	0.571188
4.07438	0.687304	0.618536	0.00850633	0.273472	0.414269	2.30259	22.1866	3	0	0.617065	-0.644551	0.552472
3.91432	0.0127805	0.491344	0.0614803	0.021548	3.24023	2.19722	20.9511	1	0	0.161295	-0.429145	0.176156
3.93949	0.00988101	0.453016	-0.0753407	0.015505	4.49092	1.94591	20.8229	1	0	0.173928	0.594416	0.116416
4.15864	0.016737	0.635246	0.0570833	0.111022	1.61954	2.19722	20.8542	2	0	0.280289	0.318583	0.312569
4.14672	0.0126683	0.644065	0.0424667	0.0891	1.22229	1.94591	20.9286	3	0	0.395732	1.42355	0.377009
4.0912	0.282346	0.547354	0.0426173	0.118824	1.20909	1.94591	21.0714	1	0	0.306388	1.82111	0.4102
3.99862	0.0825169	0.545742	-0.1642	0.236717	1.23871	2.19722	20.7607	1	0	0.373918	-0.050516	0.339199
4.08619	0.0714426	0.366525	-0.0556767	0.2263	1.01527	1.94591	20.7818	3	0	0.118222	-0.151873	0.410734
4.1023	0.0913808	0.55058	-0.102527	0.253181	0.743582	2.07944	20.6745	3	0	0.168547	-0.239633	0.432391
4.11371	0.238844	0.594967	-0.079908	0.345276	0.76506	1.79176	20.6152	3	0	0.183852	-0.073617	0.488295
3.93221	0.0299618	0.493564	0.246255	0.02102	2.43997	2.07944	21.3698	3	0	0.099685	0.290851	0.219062
3.93967	0.0211886	0.545265	0.289903	0.021092	1.82673	2.3979	21.9506	2	0	0.251226	-0.022883	0.245498
4.03637	0.0711955	0.646063	0.217666	0.017206	2.76058	2.19722	22.1047	2	0	0.387072	0.232457	0.197784
4.03054	0.0633928	0.447521	0.146468	0.016918	2.88418	2.07944	22.0806	2	0	0.499967	-0.148071	0.202607
4.01239	0.0522297	0.450529	0.050182	0.019127	2.56251	2.19722	21.9611	2	0	0.24801	-0.280365	0.227555
4.02764	0.0622291	0.444975	0.0492597	0.016221	3.12322	1.94591	21.8004	2	0	0.310101	-0.306682	0.137949
4.06719	0.0886068	0.636511	0.0368573	0.022909	3.46265	1.94591	21.8162	1	0	0.326262	-0.298942	0.166942
4.03097	0.074442	0.610833	-0.200903	0.049174	4.23591	2.30259	21.5546	3	0	0.30284	-0.052729	0.155802
4.07348	0.0849105	0.641277	0.10744	0.067786	4.49133	1.94591	21.6182	1	0	0.296336	-0.240758	0.145329
3.93143	0.101119	0.213301	0.205259	0.101269	9.36431	2.07944	22.3136	1	0	0.310747	-0.195698	0.071666
3.93001	0.0999871	0.270863	0.13097	0.112902	5.32672	2.07944	22.3963	3	0	0.411602	-0.416772	0.117233
3.93615	0.108893	0.360028	0.175843	0.10794	4.44719	2.07944	22.5338	1	0	0.378342	-0.11939	0.160568
4.09427	0.307494	0.318301	0.145168	0.067186	2.74657	1.94591	23.0047	1	0	0.475085	-0.257618	0.296462
4.10488	0.128161	0.460437	-0.062415	0.099432	2.1674	1.94591	22.8432	2	0	0.429614	-0.375826	0.288009
4.10197	0.153264	0.714853	0.225234	0.090586	2.16719	2.30259	22.9892	1	0	0.353417	-0.443172	0.279856
4.10315	0.117041	0.403543	0.201676	0.063905	3.54323	1.94591	23.2856	2	0	0.381589	-0.233743	0.187369
4.14552	0.301631	0.506516	0.143798	0.068682	3.44148	1.94591	23.3003	2	0	0.413921	-0.122447	0.182511
4.18442	0.456541	0.67439	0.165175	0.059978	3.37502	2.19722	23.4378	1	0	0.576086	-0.256936	0.189139
3.91107	0.598843	0.423335	0.045984	0.556169	1.03042	2.56495	21.3158	1	0	0.456337	-0.069799	0.434887
3.91014	0.0862176	0.426669	0.0460193	0.537507	0.992245	2.48491	21.3762	3	0	0.501699	0.057265	0.446166
3.90991	0.174565	0.421159	-0.0103513	0.555164	1.08063	2.56495	21.3912	3	0	0.687759	-0.022806	0.46527
3.95675	0.245271	0.58426	0.0141863	0.4814	1.02348	2.83321	21.4593	1	0	0.890007	-0.018078	0.490975
4.08368	0.221655	0.658554	0.0470713	0.478931	1.40993	2.48491	21.4401	1	0	0.780377	0.075875	0.441049
4.07249	0.640343	0.530826	0.0337817	0.440037	1.36348	2.48491	21.4555	3	0	0.66829	0.005807	0.431692
4.0061	0.154471	0.409103	0.0832643	0.400005	1.45046	2.77259	21.5132	1	0	0.469217	0.043539	0.430158
4.05796	0.535741	0.444802	0.0919003	0.422525	1.55952	2.48491	21.5522	2	0	0.75515	-0.137335	0.378079
4.04056	0.602663	0.573186	0.0402707	0.408691	1.70184	2.56495	21.5082	1	0	0.589066	0.022428	0.358688
3.92311	0.266504	0.217781	0.0989017	0.013859	0.813978	2.48491	22.7874	1	0	0.300039	0.491347	0.184777
3.92601	0.206852	0.167683	0.0788203	0.010365	2.98874	2.56495	23.0652	2	0	0.464994	0.243014	0.184898
3.92341	0.221146	0.226558	0.0386673	0.00392	4.00835	2.48491	23.0142	1	0	0.605053	0.082091	0.129841
3.96886	0.399611	0.421216	-0.528818	0.005622	2.28048	2.56495	22.4909	3	0	0.575181	-0.112461	0.124494
4.11062	0.599137	0.563571	0.080839	0.003654	5.07204	2.48491	22.5129	2	0	0.356369	-0.179127	0.07354
4.03658	0.433191	0.425796	0.06793	0.002962	4.54959	2.30259	22.551	3	0	0.432227	-0.039289	0.110697
4.10317	0.0213807	0.557148	-0.310656	0.003392	4.5941	2.30259	22.3007	1	0	0.355161	-0.188043	0.134693
4.05739	0.406502	0.591919	0.0253093	0.00266	5.13707	2.3979	22.3726	2	0	0.562452	-0.107672	0.121954
4.07306	0.501917	0.507579	0.047736	0.002391	6.39307	2.19722	22.378	1	0	0.371147	0.124694	0.091039
4.05433	0.199635	0.52087	0.079993	0.171423	1.04027	1.79176	20.1072	3	0	-0.003002	0.332465	0.496258
4.05398	0.188113	0.499235	0.076444	0.121167	1.33102	1.79176	20.3356	3	0	0.239843	0.214198	0.272395
4.05193	0.179931	0.647332	0.0737107	0.092378	0.840006	1.79176	20.564	1	0	0.482688	0.095931	0.384593
4.01489	0.0989454	0.650364	0.0310217	0.248587	0.641978	1.79176	20.7742	3	0	0.685761	0.117932	0.480256
4.06353	0.219842	0.58541	0.002423	0.225705	0.815793	2.3979	20.7822	2	0	0.105907	0.326129	0.46073
4.1358	0.41257	0.643366	-0.316838	0.273291	0.239345	2.19722	20.3004	2	0	0.049449	-0.526768	0.429419
4.10476	0.397716	0.563571	-0.326519	0.328306	0.722984	2.30259	20.1111	2	0	0.113546	0.600743	0.572481
4.08728	0.318458	0.604217	-0.0369797	0.383321	1.20662	2.63906	19.7865	1	0	0.151256	1.72825	0.715543
4.20662	0.611774	0.687881	0	0.438336	1.69026	2.83321	19.4618	1	0	0.188966	6.85576	0.858605
3.99584	0.0544495	0.560039	0.24019	0.010548	2.61619	1.94591	21.2816	1	0	0.223099	-0.04966	0.369566
4.01154	0.0599964	0.0103516	0.156586	0.004429	7.09266	1.94591	21.2766	2	0	0.399571	-0.008024	0.139173
4.13463	0.0974137	0.723055	0.0697893	0.003588	7.78263	1.94591	21.2716	1	0	0.576043	0.033612	0.125869
4.09919	0.0912395	0.558268	0.0746287	0.001932	7.29277	2.48491	21.3174	2	0	0.760979	0.07703	0.133426
4.01565	0.052594	0.101731	0.118145	0.001525	8.07035	1.94591	21.3805	1	0	0.52028	0.259203	0.119529
4.04487	0.0699321	0.661022	0.065222	0.003451	7.01196	2.07944	21.4117	1	0	0.601927	-0.065211	0.136111
4.07049	0.0796305	0.706133	-0.0395913	0.004035	3.99232	1.94591	21.4992	3	0	0.703623	0.902517	0.244908
4.08603	0.0866729	0.684008	0.0474263	0.007259	2.53986	2.07944	21.7574	3	0	0.666818	0.839991	0.373466
4.01308	0.055174	0.693135	0.142335	0.006077	2.34827	1.94591	21.7023	1	0	0.442459	-0.069647	0.395303
3.98646	0.374569	0.443885	0.097132	0.304792	1.87276	1.84388	20.3866	1	0	0.925191	-0.375901	0.292676
4.01571	0.396321	0.334183	0.0979523	0.261457	1.78027	1.96166	20.4721	3	0	0.784346	0.010027	0.292094
4.22898	0.998547	0.650476	0.0829127	0.228064	1.8938	2.07944	20.5576	3	0	0.643501	0.395955	0.277149
4.14811	0.74562	0.488359	0.0526283	0.341412	1.73283	2.19722	20.6431	3	0	0.502656	0.781883	0.296518
4.05905	0.485296	0.780359	0.0622423	0.35474	1.90274	2.19722	20.6103	3	0	0.472738	0.362927	0.246788
4.04311	0.478926	0.558554	0.0444017	0.323623	1.70308	1.79176	20.7035	3	0	0.266441	0.184011	0.291649
4.04587	0.445732	0.22983	0.0320563	0.2654	2.59023	1.79176	20.9487	2	0	0.438824	0.898	0.399633
4.04979	0.473446	0.72342	0.0416413	0.242689	2.9174	2.19722	20.9686	1	0	0.509845	0.076363	0.385307
4.12841	0.495363	0.660929	0.0643257	0.199893	3.47059	1.79176	20.9947	1	0	0.578142	0.345904	0.366911
4.0457	0.145696	0.716501	0.160724	0.062888	12.5287	2.30259	20.5712	1	0	0.595779	0.576966	0.072999
4.00028	0.0701222	0.79699	0.159349	0.053394	17.6025	2.30259	20.6769	1	0	0.364388	-0.035916	0.051054
4.18321	0.296874	0.774459	0.115639	0.047825	17.0045	2.3979	20.7352	2	0	0.449223	0.175675	0.052611
4.13225	0.214567	0.466275	0.0662353	0.043541	7.48962	1.94591	20.8319	1	0	0.669759	-0.108792	0.113152
4.08186	0.159632	0.705694	0.0641643	0.033091	3.09569	1.94591	21.1547	3	0	0.477932	0.288437	0.298293
4.0366	0.0723533	0.435556	0.071069	0.032083	2.95766	2.07944	21.1515	1	0	0.488181	-0.019285	0.273105
4.09563	0.0689701	0.421098	0.0946507	0.027482	3.28247	1.94591	21.3666	1	0	0.412222	-0.231761	0.314554
4.03708	0.100915	0.491558	0.1482	0.024618	3.51955	1.60944	21.4454	3	0	0.512654	0.055849	0.251845
4.01596	0.0752054	0.65279	0.111943	0.023345	5.2385	1.60944	21.4125	3	0	0.289387	-0.089059	0.138933
4.00111	0.62622	0.61335	0.188899	0.019946	13.9161	1.6946	20.5691	1	0	0.203184	-0.814258	0.065275
4.06537	0.62622	0.675272	0.150712	0.023841	17.6025	1.94591	20.8415	2	0	0.320511	-0.220357	0.06843
4.23846	0.523598	0.495506	0.0628363	0.072038	3.56244	2.19722	21.1138	2	0	0.437838	0.681087	0.258192
4.10561	0.551723	0.634594	0.0162067	0.185696	1.50985	2.07944	21.2958	3	0	0.78235	0.029375	0.333437
3.98506	0.343829	0.637517	-0.187982	0.073132	1.34841	1.94591	21.0157	1	0	0.532797	-0.240376	0.460396
4.04094	0.230138	0.519905	0.165084	0.065125	1.64862	2.07944	21.0228	1	0	0.486567	-0.510254	0.341477
4.14949	0.712234	0.527237	0.244559	0.045877	2.0874	1.94591	21.261	3	0	0.359352	0.153783	0.282702
4.13532	0.71242	0.629972	0.114405	0.03975	3.66263	2.63906	21.3907	3	0	0.321108	0.168945	0.143982
4.02907	0.636876	0.637517	-0.186072	0.033623	5.23786	2.07944	21.2124	3	0	0.282864	0.184107	0.005262
3.97265	0.0396654	0.456581	0.00548233	0.229508	3.59907	2.07944	20.1801	3	1	0.180536	0.115839	0.18641
3.98265	0.0374159	0.489351	0.00439233	0.218663	3.48883	2.07944	20.1969	1	1	0.138528	0.297837	0.197143
4.21579	0.239654	0.71001	0.00451667	0.249585	4.40213	2.56495	20.136	1	1	0.250936	0.252512	0.15336
4.18726	0.195846	0.718981	0.00611167	0.225985	3.50888	2.3979	20.1971	2	1	0.43446	0.441381	0.199092
4.05488	0.0745693	0.457968	0.012766	0.207146	3.38013	2.19722	20.2365	2	1	0.387726	0.13578	0.211938
4.0547	0.0796326	0.647377	0.0172613	0.209282	4.08693	2.63906	20.1885	3	1	0.404006	0.071363	0.174797
4.0171	0.0693321	0.641458	0.0195523	0.12827	2.72201	2.19722	20.3489	1	1	0.335263	0.781783	0.284033
3.96869	0.0596321	0.617275	0.0168143	0.111296	2.23827	2.19722	20.4623	2	1	0.352864	0.26484	0.347892
4.06753	0.0888511	0.843952	0.0216933	0.116694	2.06121	2.56495	20.5577	1	1	0.328822	0.032433	0.398498
3.95615	0.132675	0.444694	0.02495	0.02886	1.97156	2.30259	22.0836	2	1	0.198591	2.1822	0.532481
3.96764	0.12183	0.59737	0.021826	0.029079	2.10195	2.56495	22.0101	1	1	0.204916	0.931389	0.487337
4.14355	0.0543362	0.239074	0.0164557	0.022566	1.8796	2.19722	22.0727	2	1	0.422913	0.458948	0.501245
4.08179	0.0320728	0.479592	0.0297217	0.018284	1.5983	2.30259	22.1717	2	1	0.497156	2.94333	0.535713
4.05806	0.113613	0.589724	0.0374283	0.014444	1.84073	2.19722	22.106	1	1	0.443009	2.94333	0.490238
4.03296	0.15211	0.79709	0.0342403	0.045054	2.67397	2.48491	22.3992	2	1	0.496372	2.44577	0.349381
4.04996	0.27158	0.67751	0.0223137	0.051468	2.95605	2.19722	22.4418	2	1	0.413348	1.96842	0.365125
4.0181	0.0612542	0.378338	0.0117717	0.031525	1.63053	2.30259	22.7008	3	1	0.667053	0.733063	0.532345
4.04791	0.060093	0.466577	0.0666867	0.04539	1.93356	2.19722	22.6168	2	1	0.635224	2.94333	0.45052
4.02233	0.370432	0.388427	0.0234783	0.548348	1.3065	2.77259	20.4118	2	0	0.094365	7.7254	0.432996
4.02254	0.287301	0.785277	-0.257669	0.423507	1.9857	2.3979	20.6333	2	0	0.189421	0.481174	0.288744
4.2103	0.222136	0.739187	0.0801883	0.033793	2.34873	2.19722	20.5904	1	0	0.276373	0.583276	0.279354
4.1679	0.19112	0.615874	-0.10884	0.036007	1.47537	2.30259	20.4417	3	0	0.416892	-0.154552	0.440634
4.08431	0.513049	0.276266	-0.39689	0.043969	1.14109	2.56495	20.1412	1	1	0.236052	-0.193763	0.652274
4.08893	0.5929	0.169422	0.0505903	0.032287	1.11488	2.30259	20.0556	1	1	0.226624	-0.255705	0.614286
4.03556	0.505799	0.466606	0.0507643	0.020605	1.06131	2.30259	20.1519	1	1	0.217195	0.012432	0.66863
4.07292	0.514475	0.517486	-0.004253	0.083577	1.00774	2.48491	19.9784	3	1	0.126083	0.280569	0.722974
4.10447	0.601784	0.388464	-0.0320523	0.070148	0.954166	1.94591	20.0927	3	1	0.177322	0.548706	0.777318
4.01173	0.1591	0.551324	0	0.072333	1.1607	1.94591	21.2413	3	1	0.054464	-0.186405	0.255227
4.00228	0.122979	0.543538	0.0458757	0.070864	1.40414	2.56495	21.2872	2	1	0.205532	-0.001216	0.259048
4.11766	0.0761154	0.491558	0.0716153	0.069395	1.64758	2.30259	21.3647	3	1	0.3566	0.183973	0.262869
4.1761	0.0609958	0.0371206	0.00371767	0.073303	1.92908	2.19722	21.2888	1	1	0.529715	-0.437369	0.204886
4.09458	0.0395754	0.101685	0.0299873	0.068203	2.13506	2.19722	21.3276	2	1	0.486587	-0.00703	0.207115
4.0976	0.0372532	0.130291	0.0609927	0.050868	1.74629	2.3979	21.7089	3	1	0.562003	-0.159446	0.281869
4.01672	0.117304	0.289101	0.0422857	0.042441	2.17919	2.19722	21.9693	2	1	0.735218	-0.001991	0.287105
4.02501	0.0490191	0.639726	-0.129985	0.102438	2.01471	2.70805	21.8276	1	1	0.736479	0.506814	0.295326
4.11841	0.333983	0.751852	0.018621	0.086181	1.72201	2.48491	21.9043	3	1	0.684496	0.088854	0.333361
3.97164	0.21936	0.642164	-0.108604	0.353382	0.56528	2.19722	20.226	2	0	0.161813	-0.20897	0.924247
3.97609	0.0517466	0.745892	0.0360087	0.269665	0.72872	2.19722	20.3968	3	0	0.200543	0.199193	0.910752
4.19047	0.0748503	0.520372	0.149813	0.285571	0.83765	2.3979	20.1715	1	0	0.239273	0.097477	0.765521
4.07457	0.0639961	0.385876	-0.0668667	0.2191	0.77031	2.30259	20.2867	3	0	0.353354	-0.032272	0.837113
4.05456	0.253638	0.722245	0.358109	0.006116	3.25288	2.30259	19.5282	1	0	0.176359	-0.325633	0.257606
4.0226	0.160417	0.479403	0.00530933	0.009921	1.66326	2.70805	19.8122	1	0	0.307496	-0.166831	0.338314
4.03189	0.0161829	0.124932	0.009146	0.004146	2.63672	2.3979	19.6061	2	0	0.238574	-0.121477	0.324675
4.03019	0.00721371	0.579269	0.36285	0.012776	2.50004	2.19722	20.1431	1	0	0.400873	0.249604	0.298841
4.02569	0.0193748	0.656857	0.036688	0.011754	2.50525	2.3979	20.1775	2	0	0.329937	0.380243	0.295391
3.95333	0.413845	0.625321	0.065727	0.132647	0.876026	1.60944	20.6666	2	0	0.06007	-0.012539	0.421612
4.01889	0.0376746	0.61896	0.113515	0.103888	1.33214	1.79176	20.7331	3	0	0.105641	-0.054714	0.364945
4.2181	0.148191	0.244823	0.028819	0.088244	0.863775	1.79176	20.7762	2	0	0.206878	-0.223926	0.346101
4.10445	0.220185	0.677745	-0.00586533	0.07804	1.17268	1.94591	20.7546	1	0	0.308116	-0.235911	0.377145
4.04125	0.159128	0.537575	-0.10531	0.079098	0.453178	1.79176	20.6366	2	0	0.259427	-0.164584	0.363094
4.02634	0.115045	0.214706	0.118248	0.064335	0.862394	1.79176	20.6766	3	0	0.392157	-0.353462	0.318799
4.04355	0.173404	0.559706	0.0341877	0.075093	1.53909	1.94591	20.651	1	0	0.364606	-0.135758	0.262103
4.06096	0.114517	0.500561	-0.125321	0.071059	1.89782	1.79176	20.64	3	0	0.126391	-0.288606	0.368713
4.01792	0.133886	0.123947	0.0293823	0.063883	1.64333	2.07944	20.6021	2	0	0.257698	-0.113508	0.361624
3.90291	0.00855787	0.394123	0	0.004921	1.00423	2.19722	21.7229	2	0	1.10078	2.94333	0.361244
3.90811	0.338674	0.692487	0.0786667	0.004073	1.34387	2.3979	21.6387	3	0	0.878889	2.94333	0.322323
4.08036	0.227475	0.410175	0.150247	0.003225	1.68352	2.30259	21.7501	2	0	0.657003	1.05233	0.283402
4.07241	0.334237	0.243664	-0.528818	0.002381	2.45021	2.30259	21.0262	1	0	0.435117	0.553194	0.353589
4.05672	0.314347	0.646001	-0.528818	0.00323	1.2288	2.19722	20.2975	3	0	0.187916	0.000929	0.584346
4.01926	0.174346	0.467303	0.064098	0.0050075	0.812671	2.48491	20.1799	3	0	0.311792	0.173582	0.600147
4.03611	0.034344	0.387926	-0.290042	0.006785	0.739731	2.19722	19.9406	2	0	0.173408	0.121783	0.458899
4.06133	0.0547979	0.435804	0.0880043	0.007544	1.00852	2.19722	19.7606	3	0	0.122066	0.111982	0.461705
3.97741	0.0363702	0.590098	-0.116367	0.007876	1.2773	2.30259	19.5492	1	0	0.08723	0.102181	0.464511
3.90941	0.215988	0.376335	0.0947917	0.133812	1.3001	1.79588	21.3583	2	0	0.402572	0.531563	0.579058
3.90954	0.23356	0.663903	0.108038	0.13549	1.48174	1.99655	21.5435	1	0	0.552376	0.522056	0.540029
3.92032	0.301956	0.801887	0.126647	0.08573	1.95635	2.19722	21.7287	1	0	0.70218	0.512549	0.43823
4.0364	0.323562	0.61943	0.0995757	0.092802	1.71397	2.3979	21.9139	3	0	0.851984	0.503042	0.477411
4.00469	0.249221	0.717288	0.079828	0.071562	1.94293	2.3979	22.1901	1	0	0.832642	0.434473	0.527351
4.03739	0.274766	0.480881	0.0859947	0.049352	1.7496	2.19722	22.3639	2	0	0.716811	0.668778	0.549941
4.00994	0.410693	0.285542	0.0803807	0.039202	1.61526	2.19722	22.6859	3	0	0.712896	0.836728	0.626689
4.03569	0.42763	0.653112	0.049647	0.035322	1.44851	2.19722	22.7591	1	0	0.778503	0.53437	0.622005
4.08471	0.41985	0.428522	0.016441	0.071422	1.29666	2.56495	22.7901	2	0	0.751613	-0.592801	0.627264
3.9342	0.326987	0.394563	0.152571	0.204837	11.4065	2.07944	20.6239	1	1	0.30311	-0.814258	0.050288
3.93442	0.326987	0.627712	0.0916517	0.556169	1.20816	2.48491	20.8321	3	1	0.40044	-0.814258	0.191775
3.97933	0.515987	0.485801	0.0842077	0.556169	1.63211	2.48491	20.8406	3	1	0.333509	-0.701622	0.154926
4.05703	0.365963	0.752748	0.0743927	0.556169	1.60796	2.30259	20.9591	2	1	0.488105	-0.707952	0.201323
3.99105	0.442722	0.399118	0.077371	0.522896	2.65499	1.94591	20.9976	1	1	0.456149	-0.681452	0.177588
3.94164	0.420829	0.424881	-0.059597	0.553757	2.5061	1.94591	20.9124	1	1	0.525178	-0.335366	0.158206
3.96611	0.53941	0.276081	-0.0601323	0.553681	3.33301	1.79176	20.8249	3	1	0.361289	-0.687256	0.127726
3.96093	0.45828	0.405544	-0.0705843	0.556169	1.84598	2.48491	20.7912	3	1	0.349754	-0.745759	0.153312
3.94171	0.308606	0.749293	0.157294	0.512723	2.52032	2.30259	20.9319	3	1	0.294193	-0.627037	0.156496
3.95784	0.294991	0.657623	0.062929	0.263266	1.15491	2.19722	20.8165	1	0	0.572521	-0.003992	0.647523
3.95814	0.0720832	0.531289	0.0917967	0.215249	1.21273	2.19722	21.03	1	0	0.64481	0.002795	0.615732
4.01913	0.191323	0.373718	0.091702	0.123109	1.76268	2.19722	21.2434	1	0	0.717099	0.009582	0.465045
4.13099	0.0125301	0.353804	0.0821173	0.10042	1.4384	2.19722	21.4569	1	0	0.789388	0.016369	0.51818
4.09621	0.214441	0.792892	0.098163	0.102521	1.29113	2.07944	21.6544	1	0	0.528272	0.123071	0.577477
4.10438	0.147053	0.094915	0.133039	0.087075	1.20155	2.19722	22.1587	3	0	0.161329	0.01057	0.639127
4.15723	0.00313211	0.155802	0.0848227	0.054141	1.5532	2.70805	22.799	2	0	0.285452	0.044227	0.53836
4.07192	0.00237903	0.468662	0.11026	0.10015	1.50863	2.19722	22.9802	3	0	0.431959	-0.262255	0.550453
4.04026	0.021222	0.0439305	0.140525	0.129383	1.59406	2.19722	23.0567	3	0	0.502517	-0.054467	0.498535
4.08042	0.209573	0.329079	0.344033	0.016675	2.20167	2.07944	21.2968	1	0	0.205006	-0.10676	0.357359
4.08001	0.300574	0.201347	0.246277	0.010179	5.38705	2.07944	21.3349	2	0	0.365946	-0.070444	0.157835
4.08386	0.406242	0.657363	0.113778	0.146119	4.70976	2.07944	21.373	3	0	0.526886	-0.034128	0.154843
4.09492	0.259297	0.388176	0.0841003	0.125243	6.21855	2.07944	21.3816	3	0	0.624652	0.002187	0.112692
4.02314	0.142644	0.483367	0.133295	0.088412	2.78917	1.94591	21.6434	2	0	0.401611	0.109877	0.231394
4.04461	0.0381713	0.622414	0.194602	0.134918	2.78087	1.94591	21.8272	1	0	0.358628	0.097801	0.251082
4.06641	0.00464737	0.708078	0.155381	0.101664	3.58773	2.19722	21.853	2	0	0.391267	-0.101775	0.187352
4.00124	0.00108199	0.402757	0.0930903	0.093363	3.75628	1.94591	21.7856	2	0	0.495197	-0.059001	0.165626
4.04067	0.0520505	0.734561	0.0266037	0.12851	3.89556	1.94591	21.7219	3	0	0.448255	-0.082217	0.158724
3.9649	0.087505	0.339335	0.309751	0.057989	4.30589	2.65926	21.5218	3	0	0.659773	0.143432	0.207509
3.96481	0.00239957	0.731319	0.36285	0.01346	3.76005	2.30259	21.6952	1	0	0.600507	0.115229	0.223235
3.9649	0.131869	0.663628	0.331652	0.010087	4.03419	1.94591	21.8686	1	0	0.541241	0.087026	0.218647
3.9592	0.0720486	0.562159	0.333192	0.007558	3.10827	2.07944	22.1116	2	0	0.481975	0.294211	0.218831
3.95569	0.037814	0.647273	0.335911	0.225424	3.05461	2.07944	22.1978	2	0	0.295494	0.270015	0.213719
3.97149	0.00609775	0.719253	0.355334	0.160739	3.35066	1.94591	22.4074	2	0	0.169667	0.081626	0.211589
4.01857	0.00103111	0.603895	0.36285	0.10124	2.38456	2.30259	22.6838	3	0	0.219509	0.032592	0.287706
4.0569	0.00202516	0.628661	0.36285	0.098468	2.11688	2.30259	22.5936	2	0	0.267496	0.013713	0.274392
4.04475	0.0202517	0.689035	0.295989	0.089863	2.92571	1.94591	22.6159	2	0	0.348426	-0.083279	0.209313
3.922	0.0141452	0.692065	0.12956	0.389397	1.11345	1.94591	20.9045	1	0	0.435611	-0.111311	0.353852
3.92106	0.00657185	0.637123	0.070756	0.232103	2.54226	1.94591	21.6221	3	0	0.633847	0.019489	0.250928
3.92511	0.0040286	0.677551	0.0591707	0.287485	2.5034	2.30259	21.9121	3	0	0.832083	0.253136	0.155071
3.9281	0.00499632	0.610641	0.0788173	0.333027	1.82348	2.07944	22.0098	1	0	0.751584	0.116891	0.203785
3.93001	0.00515935	0.544969	0.097947	0.361203	1.67447	2.07944	22.0484	2	0	0.740765	-0.033918	0.189662
3.92483	0.212541	0.431247	-0.201672	0.444087	1.81234	1.94591	21.9272	2	0	0.783735	0.022602	0.284369
3.92814	0.123063	0.677749	0.0599487	0.368731	1.27485	1.94591	22.0977	2	0	0.630744	-0.130903	0.414398
4.03543	0.085493	0.734561	0.089122	0.402649	1.3412	1.94591	22.0817	1	0	0.856107	-0.047644	0.36046
4.03749	0.0733383	0.738146	0.0991693	0.428553	1.45558	2.3979	21.9723	3	0	0.754129	0.130104	0.300393
3.92652	0.0679874	0.585966	0.170649	0.104799	1.86773	2.30259	20.288	3	0	0.47793	0.126769	0.44604
3.92646	0.141424	0.587186	0.138009	0.083585	1.8292	2.30259	20.2781	2	0	0.521227	0.046451	0.464669
3.92652	0.359988	0.526701	0.12674	0.059154	3.05347	2.30259	20.2682	2	0	0.564524	-0.033867	0.297977
3.92652	0.0302756	0.573718	0.0871093	0.058845	3.25775	2.30259	20.2583	1	0	0.607821	-0.114185	0.278508
3.92608	0.206472	0.545345	0.0846817	0.050798	2.89216	2.19722	20.2935	1	0	0.606668	-0.24882	0.317655
3.92662	0.0407897	0.49729	0.072225	0.033929	1.73233	2.56495	20.699	1	0	0.467459	-0.03111	0.549263
3.92863	0.0327886	0.509574	0.0947953	0.032812	1.56099	2.30259	20.8942	2	0	0.340383	0.070334	0.60508
3.9662	0.0379108	0.505718	0.146223	0.030201	1.51808	2.30259	21.0168	3	0	0.275623	-0.043497	0.601795
4.07945	0.0345341	0.649976	0.110794	0.111681	1.54037	2.30259	20.9481	1	0	0.395446	0.018123	0.546986
3.93365	0.00158053	0.547245	-0.528818	0.225013	0.943074	1.60944	17.597	1	0	0.943074	-0.814258	0.143467
3.93357	0.00135474	0.573337	-0.528818	0.225013	0.913708	1.60944	17.597	1	0	0.913708	-0.814258	0.151773
3.93365	0.00112895	0.500339	-0.528818	0.225013	0.884342	1.60944	18.1349	3	0	0.884342	-0.814258	0.160079
3.93365	0.00090316	0.534689	-0.495689	0.225013	0.854976	1.60944	18.6728	3	0	0.854976	-0.814258	0.168385
3.93365	0.00067737	0.657833	-0.370559	0.225013	0.82561	1.60944	19.2107	3	0	0.82561	-0.814258	0.176691
3.93357	0.00045158	0.711284	-0.245429	0.1759	0.796244	1.60944	19.7486	1	0	0.796244	-0.474537	0.184997
3.93652	0.00022579	0.594459	-0.120298	0.0307	0.766878	1.60944	20.2866	1	0	0.766878	-0.134816	0.193303
4.00221	0.00633995	0.696126	0.004832	0.1145	0.737512	1.60944	20.8245	1	0	0.737512	0.204905	0.201609
4.08722	0.00028439	0.731081	0.0121737	0.2597	0.708146	1.60944	20.8483	1	0	0.708146	0.224203	0.209915
4.23846	0.198038	0.720812	-0.037409	0.225013	10.7998	1.94591	21.3153	1	0	1.50796	1.52063	0.132331
4.0287	0.177416	0.604843	-0.0302633	0.0661331	10.2765	1.94591	21.264	1	0	1.38577	1.35495	0.132797
4.15595	0.156794	0.700339	-0.0231177	0.122513	9.75319	1.94591	21.2127	3	0	1.26359	1.18926	0.133263
4.06295	0.136172	0.622454	-0.015972	0.298679	9.22989	1.94591	21.1614	1	0	1.1414	1.02357	0.133729
4.06767	0.11555	0.258428	-0.00882633	0.182264	8.70659	1.94591	21.1101	1	0	1.01922	0.857887	0.134195
4.14686	0.0949278	0.640387	-0.00168067	0.183767	8.18329	1.94591	21.0588	3	0	0.897031	0.692201	0.134661
4.06302	0.0743057	0.53084	0.005465	0.238064	7.65999	1.94591	21.0076	2	0	0.774845	0.526515	0.135127
4.0423	0.0536835	0.459416	0.0126107	0.285997	7.13669	1.94591	20.9563	3	0	0.652659	0.360829	0.135593
4.04844	0.0330614	0.593562	0.0197563	0.1197	6.61339	1.94591	20.905	2	0	0.530473	0.195143	0.136059
4.00511	0.229634	0.630688	0.012013	0.082	4.93336	1.94591	22.2733	1	0	0.155411	-0.072296	0.161355
3.99245	0.310026	0.692912	0.00549933	0.0513	1.42236	2.19722	22.4644	2	0	0.159102	0.064185	0.336846
4.06603	0.28278	0.622454	-0.083214	0.0311	0.72496	2.19722	22.599	1	0	0.259266	-0.106329	0.569138
4.0787	0.278834	0.592268	-0.072286	0.0256	1.50172	2.19722	22.5795	2	0	0.386652	-0.084046	0.451203
4.06518	0.335266	0.668416	0.0108857	0.0363	1.34705	1.94591	22.5153	2	0	0.285252	0.325246	0.713625
4.0623	0.433786	0.251512	0.0228493	0.1098	1.41767	2.19722	22.5962	3	0	0.332778	0.446206	0.71762
4.01785	0.244244	0.65204	0.0195713	0.1611	0.681739	2.19722	22.6834	2	1	0.226027	0.232354	0.859784
4.02859	0.210459	0.460182	0.0254993	0.1843	0.49605	2.19722	22.848	1	1	0.205389	0.274393	0.939703
4.15095	0.194796	0.715001	0.00736267	0.1215	0.576646	2.19722	22.7882	2	1	0.210657	0.406254	0.951259
3.96064	0.229432	0.222332	0.0250727	0.0541	0.945767	1.79176	23.2655	3	0	1	0.526986	0.976365
3.96691	0.671567	0.240006	0.036549	0.04885	0.698181	1.94591	23.4557	2	0	0.017067	-0.172423	0.976365
4.0658	0.146442	0.434011	0.0421913	0.0436	0.921951	1.94591	23.6947	3	0	0.025208	-0.814258	0.976365
4.06218	0.485541	0.43811	0.0232113	0.0441	1.01426	2.07944	23.8526	3	0	0.034818	-0.814258	0.976365
4.03639	0.0707094	0.641611	0.0211577	0.1099	0.930413	2.07944	24.0402	1	0	0.04166	0.002374	0.823604
4.09919	0.0135933	0.681618	0.011981	0.0388	1.09119	2.19722	24.3435	1	0	0.094803	-0.136519	0.670844
4.10212	0.32165	0.599414	-0.107571	0.0153	1.6634	2.07944	24.3435	1	0	0.06645	-0.494212	0.518084
4.02674	0.00325557	0.680608	0.0148933	0.012	1.26643	2.19722	24.3435	3	0	0.044389	-0.139092	0.674284
4.07327	0.0839007	0.72668	0.014632	0.0353	0.231378	2.19722	24.3435	3	0	0.144007	-0.162528	0.804715
4.0092	0.00657012	0.32476	0.0192053	0.0245	1.40634	2.19722	23.1487	2	0	0.226425	0.208302	0.200623
4.03542	0.133579	0.549317	0.023492	0.004	1.43391	2.07944	23.5118	2	0	0.562692	0.273819	0.177873
4.15091	0.351446	0.62897	0.019962	0.0018	1.76179	2.19722	23.6112	1	0	0.686532	0.219921	0.196206
4.09354	0.34235	0.611894	0.0162183	0.0015	1.60931	2.19722	23.606	1	0	0.847827	0.062435	0.182215
4.03264	0.0549461	0.619431	0.0149653	0.0021	1.12857	2.19722	23.3405	3	0	0.923729	-0.097187	0.17871
4.12026	0.0333694	0.597999	0.010664	0.0019	1.02476	2.19722	23.1381	1	0	0.682806	0.137805	0.166967
4.12509	0.020358	0.536104	0.00439733	0.0016	2.81259	2.19722	22.9407	1	0	0.594721	0.233557	0.105128
4.18076	0.0137074	0.652587	-0.016194	0.0017	2.26788	2.07944	22.8692	2	0	0.979479	0.152609	0.117135
4.19105	0.0174467	0.736067	-0.0243793	0.0015	1.73361	2.19722	22.7392	1	0	0.853934	0.326596	0.133097
3.99531	0.0631246	0.309882	0.012285	0.0549	4.92706	2.19722	21.8463	3	0	1	-0.814258	0.175163
3.97823	0.31915	0.303965	0.0306317	0.0254	4.53442	2.19722	21.9269	1	0	0.462372	-0.814258	0.123189
4.04612	0.326398	0.603713	0.03288	0.0236	6.78699	2.19722	22.0075	3	0	0.601061	-0.814258	0.071215
4.12272	0.115593	0.668619	-0.172983	0.0248	5.10728	2.19722	22.0475	2	0	0.730769	-0.814258	0.115057
4.10969	0.215497	0.679032	-0.200806	0.0198	12.2396	1.94591	21.625	2	0	0.54761	-0.147906	0.055711
4.05687	0.0927658	0.687958	-0.228628	0.0148	13.053	2.19722	21.0567	1	0	0.834433	0.55796	0.136792
4.09368	0.0641414	0.556471	-0.256451	0.05	2.87266	2.19722	21.5271	2	0	0.583612	0.683712	0.217473
4.08346	0.035517	0.535753	-0.284274	0.1358	2.03692	2.19722	21.6585	1	0	0.648599	1.24221	0.253507
4.1124	0.00689258	0.771926	-0.312096	0.1401	1.80922	2.19722	21.5703	3	0	0.798959	0.109139	0.254413
3.99189	0.51124	0.473303	0.022079	0.556169	6.32142	1.94591	21.533	1	0	0.110236	-0.277757	0.059181
4.01205	0.485522	0.704012	0.0257343	0.0473	7.212	1.94591	22.8846	3	0	0.546004	-0.267313	0.123007
4.17702	0.161344	0.609904	0.023839	0.0384	3.92379	1.94591	23.2756	3	0	0.482017	0.006708	0.290235
4.11288	0.0631249	0.644129	0.0217987	0.0358	5.20663	1.94591	23.0918	1	0	0.626932	0.243975	0.149575
4.06113	0.0272466	0.716336	0.0217517	0.0344	3.22278	1.94591	23.0198	1	0	0.258618	0.217777	0.188672
4.05949	0.387573	0.50565	0.020208	0.0268	5.49227	1.94591	23.106	1	0	0.296069	0.283042	0.120961
4.04107	0.421837	0.585242	0.0141003	0.0225	4.97226	1.94591	23.2019	2	0	0.466519	0.308101	0.111539
3.99426	0.0320763	0.691274	0.0211307	0.0184	1.89684	1.94591	23.3042	3	0	0.764997	0.220478	0.098988
4.03135	0.0201809	0.525301	0.0224753	0.0183	1.48894	1.94591	23.3163	1	0	0.565975	0.225924	0.122552
3.97749	0.411394	0	-0.0278423	0.1307	1.71341	1.94591	21.0953	1	0	0.198712	-0.187317	0.268005
3.97046	0.129941	0	0.014064	0.114	2.00027	1.94591	21.4162	3	0	0.364339	-0.577546	0.227047
4.07825	0.346626	0	0.0230013	0.1025	2.63236	1.94591	21.3907	2	0	0.450992	-0.441612	0.155648
4.07515	0.0937635	0	0.0159253	0.1422	0.818408	1.94591	21.7026	2	0	0.799781	-0.551503	0.292608
4.08624	0.299664	0.459833	0.012898	0.124	0.860259	1.94591	21.8288	2	0	0.418733	2.94333	0.479907
4.02376	0.273	0.785721	0.008523	0.0861	1.13017	2.07944	22.0807	2	0	0.384451	2.94333	0.456029
4.09591	0.0603647	0.703209	0.00685367	0.098	1.03227	1.94591	22.1044	2	0	0.423103	-0.027793	0.38333
4.05326	0.0118409	0.764799	0.0350387	0.0896	1.13057	1.94591	22.2061	2	0	0.646915	-0.067352	0.380547
4.05518	0.0063559	0.733941	0.0354863	0.085	1.48386	1.94591	22.2758	1	0	0.499991	0.053589	0.311117
3.95084	0.00198852	0.382209	0.005336	0.2266	11.6033	2.19722	19.5667	3	0	0.527996	-0.058499	0.083344
3.95074	0.00288855	0.384177	0.00791633	0.1903	8.82854	2.19722	19.7753	1	0	0.513487	0.015786	0.019944
3.95411	0.00239957	0.686749	0.0104967	0.154	6.05372	2.19722	19.9838	2	0	0.498978	0.090071	0.123232
4.01271	0.00239957	0.427895	0.013077	0.1177	3.27891	2.19722	20.1923	1	0	0.484469	0.164356	0.22652
3.99633	0.127211	0.456181	0.0259993	0.0814	2.27692	2.07944	20.4214	2	0	0.521638	0.344047	0.302673
4.0559	0.0269692	0.25245	0.0197027	0.1732	1.89906	2.07944	20.2015	3	0	0.461044	0.013637	0.273391
4.13747	0.0615505	0.564472	0.0209343	0.1035	2.04123	2.07944	20.8506	1	0	0.534972	0.048881	0.281908
4.07401	0.0884696	0.407389	0.0183917	0.1158	1.91769	2.19722	20.7529	2	0	0.449306	-0.074213	0.255175
4.08687	0.0267352	0.592615	0.017847	0.1016	1.42911	2.19722	20.7503	1	0	0.321641	0.159174	0.326038
3.98346	0.188855	0	0.11315	0.0096	2.1176	2.19722	21.2042	2	0	0.200186	1.0063	0.177656
4.00331	0.399552	0	0.049552	0.0091	1.49013	2.19722	21.4543	3	0	0.404582	0.336066	0.314287
4.20493	0.169346	0.753864	0.052114	0.0109	0.847257	2.07944	21.5973	3	0	0.54187	0.213509	0.480471
4.1178	0.163533	0.622217	0.0337117	0.0108	1.08968	2.19722	21.5118	1	0	0.543059	0.039482	0.43053
4.08327	0.189791	0.462297	0.02765	0.0121	1.16727	2.19722	21.074	1	0	0.354149	0.265806	0.642084
4.11226	0.14663	0.634477	0.013711	0.0135	1.04463	1.94591	20.8826	1	0	0.209113	0.166437	0.608194
4.12521	0.192159	0.596586	0.01963	0.0146	1.27821	1.94591	20.7439	2	0	0.212653	0.080433	0.479754
4.06952	0.152931	0.627942	0.017181	0.0235	1.22415	1.94591	20.7554	3	0	0.27459	0.465383	0.441574
4.05829	0.10972	0.689832	0.00289933	0.02	1.18691	1.94591	20.7603	2	0	0.249677	0.767178	0.435482
3.94395	0.389351	0.304302	0.0180343	0.4434	8.16426	1.94591	21.1168	3	0	1.7292	1.50522	0.172571
3.94388	0.311481	0.342075	0.0138063	0.4038	7.21546	1.94591	21.233	3	0	1.48669	1.26918	0.173303
3.94433	0.233611	0.373324	0.00957833	0.3642	6.26665	1.94591	21.3492	3	0	1.24418	1.03313	0.174035
3.99169	0.15574	0.765693	0.00535033	0.3246	5.31785	1.94591	21.4653	2	0	1.00168	0.797084	0.174767
4.07694	0.0778702	0.52316	0.00112233	0.285	4.36905	1.94591	21.5815	3	0	0.759172	0.561038	0.175499
4.00895	0.68886	0.320584	-0.00310567	0.2454	3.42024	1.94591	21.6977	3	0	0.516666	0.324992	0.176231
4.00657	0.62622	0.590489	0.0102523	0.2058	5.75897	1.94591	22.0635	3	0	0.734593	0.067902	0.333847
4.03289	0.62622	0.667153	0.00287967	0.2951	5.17903	1.94591	22.155	3	0	0.740861	0.304211	0.354601
4.05951	0.496357	0.598188	-0.0361423	0.2771	2.57336	1.94591	22.3711	3	0	0.62796	0.234685	0.5061
4.21307	0.440622	0	0.184656	0.3361	2.10107	2.56495	23.1713	1	0	0.674641	-0.814258	0.899729
4.2124	0.220115	0	0.158408	0.3186	1.36183	2.56495	23.2273	1	0	0.680962	-0.814258	0.803882
4.16847	0.0560774	0	0.13216	0.3011	0.622596	2.56495	23.2832	2	0	0.687283	-0.814258	0.708035
4.09786	0.00497694	0.629927	0.105912	0.2836	0.11664	2.56495	23.3392	3	0	0.693604	-0.814258	0.612188
4.00498	0.0106932	0.511276	0.0796643	0.2661	0.855876	2.56495	23.3951	1	0	0.699925	-0.814258	0.516341
3.99977	0.0164094	0.450449	0.0534163	0.2486	1.59511	2.56495	23.4511	1	0	0.706246	-0.814258	0.420494
4.037	0.0221257	0.648427	0.0271683	0.2311	2.33435	2.56495	23.507	3	0	0.712567	-0.123911	0.324647
4.20108	0.027842	0.685198	0.00092033	0.2136	3.07358	2.56495	23.5629	3	0	0.718888	1.08949	0.2288
4.12884	0.0272019	0.415309	0.00738867	0.1961	3.14643	2.56495	23.6909	1	0	0.770348	1.13149	0.222696
4.07138	0.140877	0	0.012816	0.128	1.71484	1.94591	22.0097	2	0	-0.003002	2.94333	0.976365
4.07093	0.0725986	0	0.0122057	0.1003	1.07987	1.94591	21.905	3	0	-0.003002	2.94333	0.976365
4.06462	0.191064	0	0.0115953	0.0726	0.444899	1.94591	21.8002	2	0	-0.003002	2.94333	0.923316
4.07203	0.173031	0	0.010985	0.0449	0.190069	1.94591	21.6954	1	0	0.008677	2.94333	0.80298
4.04916	0.391007	0	0.0103747	0.0172	0.825037	1.94591	21.5907	2	0	0.17215	2.94333	0.682644
4.02685	0.00026769	0.402128	0.00976433	0.0105	1.46	1.94591	21.4859	1	0	0.335623	2.94333	0.562308
3.98527	0.00127893	0.806378	0.009154	0.0382	2.09497	1.94591	21.3812	3	0	0.499096	2.0466	0.441972
4.01865	0.00229017	0.659704	0.00854367	0.0659	2.72994	1.94591	21.2764	1	0	0.662569	0.069207	0.321636
4.00051	0.0172926	0.628966	0.0128347	0.0936	2.51947	1.94591	21.2889	1	0	0.700578	-0.145531	0.333285
3.97725	0.62622	0.345076	-0.0149467	0.276	3.63409	1.79176	21.2203	3	0	1.01212	0.559442	0.147253
4.00025	0.62622	0.73633	-0.00780133	0.2698	3.34967	1.79176	21.1697	2	0	0.934254	0.450847	0.190102
4.07656	0.596975	0.443232	-0.000656	0.2636	3.06525	1.79176	21.119	1	0	0.856393	0.342252	0.232951
4.01664	0.514	0.443337	0.00648933	0.2574	2.78083	1.79176	21.0684	2	0	0.778532	0.233657	0.2758
3.99412	0.431024	0.653935	0.0136347	0.2512	2.49641	1.79176	21.0178	2	0	0.700671	0.125062	0.318649
3.99106	0.348049	0.720332	0.02078	0.245	2.21199	1.79176	20.9672	3	0	0.62281	0.016467	0.361498
4.03806	0.265073	0.639535	0.0279253	0.2388	1.92757	1.79176	20.9166	1	0	0.544949	-0.092128	0.404347
4.03762	0.182098	0.520355	0.0350707	0.2326	1.64315	1.79176	20.8659	1	0	0.467088	-0.200723	0.447196
4.04721	0.131367	0.582925	0.0344317	0.2264	1.78792	1.79176	20.8709	1	0	0.442069	-0.39322	0.404175
3.97027	0.325642	0.350449	0.0229143	0.1125	2.02799	2.19722	22.2975	3	0	0.573311	0.472337	0.50604
3.99945	0.352339	0.47898	0.0137487	0.0878	1.60883	2.19722	22.7906	1	0	0.728932	1.50063	0.606162
4.02138	0.292154	0.486338	0.008254	0.1063	1.17409	2.3979	22.7491	2	0	0.471489	0.275756	0.65359
4.11599	0.00759396	0.461395	-0.0486413	0.1116	0.771626	1.94591	22.282	2	0	0.693867	-0.333257	0.678099
4.12502	0	0.5089	-0.0948513	0.1278	0.541692	1.94591	22.072	1	0	0.539895	0.14709	0.889553
4.11932	0	0.588204	-0.0354623	0.1255	0.46857	1.79176	21.9968	3	0	0.721195	0.160538	0.976365
4.14225	0	0.605143	0.0427517	0.1204	2.62263	1.94591	21.7636	3	0	0.527816	0.580233	0.3509
4.14443	0.169891	0.735616	-0.00085667	0.1972	1.37458	1.94591	21.8329	1	0	0.43157	2.33536	0.436402
4.15359	0.339782	0.710696	-0.044465	0.274	0.126531	1.94591	21.9022	2	0	0.335324	2.94333	0.521904
4.07733	0	0.732153	0.070639	0.0663	4.32903	2.07944	20.8098	2	0	-0.003002	1.96105	0.175254
4.08034	0	0.451799	0.065543	0.0309	4.75904	2.07944	20.8958	1	0	-0.003002	1.68507	0.164921
4.10237	0	0.178386	0.060447	0.0045	5.18904	2.07944	20.9817	3	0	0.088506	1.40909	0.154588
4.11177	0	0.70666	0.055351	0.0399	5.61905	2.07944	21.0677	2	0	0.20422	1.13311	0.144255
4.06092	0	0.574695	0.050255	0.0753	6.04905	2.07944	21.1537	1	0	0.319934	0.857135	0.133922
4.10872	0	0.705336	0.045159	0.1107	6.47905	2.07944	21.2396	2	0	0.435648	0.581157	0.123589
4.01585	0	0.386692	0.040063	0.1461	6.90906	2.07944	21.3256	1	0	0.551362	0.305179	0.113256
3.96637	0.0225071	0.597098	0.034967	0.1815	7.33906	2.07944	21.4116	1	0	0.667076	0.029201	0.102923
4.00845	0.0934045	0.611168	0.0198177	0.2169	5.61409	2.07944	21.4915	2	0	0.853126	-0.141968	0.127673
3.92205	0	0.340531	-0.146641	0.5185	17.6025	1.94591	20.7147	3	0	0.648854	1.85543	0.102588
3.92204	0	0.549947	-0.116798	0.4781	16.953	1.94591	20.8619	3	0	0.651249	1.61478	0.057694
3.92205	0	0.67517	-0.0869547	0.4377	14.3892	1.94591	21.0092	1	0	0.653644	1.37413	0.0128
3.92205	0	0.338923	-0.0571113	0.3973	11.8253	1.94591	21.1565	2	0	0.656039	1.13347	0.032094
3.92205	0	0.407083	-0.027268	0.3569	9.2614	1.94591	21.3037	2	0	0.658434	0.89282	0.076988
3.92204	0	0.456098	0.00257533	0.3165	6.69752	1.94591	21.451	2	0	0.660829	0.652167	0.121882
3.92272	0.00767628	0.467048	0.0324187	0.2761	4.13364	1.94591	21.5983	3	0	0.663224	0.411514	0.166776
3.96123	0	0.534691	0.15394	0.2357	3.768	1.94591	21.7637	2	0	0.801358	0.120641	0.191179
4.06986	0.0114875	0.725717	0.275461	0.192	3.73707	1.94591	21.8611	3	0	0.35856	0.001272	0.201254
3.96817	0	0.662786	0.234969	0.2553	2.10107	1.94591	21.5079	2	0	-0.003002	1.5668	0.410422
3.96799	0	0.618463	0.203893	0.2423	2.10107	1.94591	21.4129	2	0	0.006277	1.33195	0.354877
3.96817	0	0.675647	0.172817	0.2293	2.10107	1.94591	21.3179	2	0	0.140046	1.09709	0.299332
3.96817	0	0.546764	0.141741	0.2163	2.10107	1.94591	21.223	2	0	0.273815	0.86224	0.243787
3.96817	0	0.470924	0.110665	0.2033	2.10107	1.94591	21.128	1	0	0.407584	0.627386	0.188242
3.96865	0	0.650989	0.0795887	0.1903	2.10107	1.94591	21.033	1	0	0.541353	0.392532	0.132697
4.00468	0	0.678315	0.0485127	0.1773	10.489	1.94591	20.9381	2	0	0.675122	0.157678	0.077152
4.05349	0	0.731614	0.0174367	0.1643	17.6025	1.94591	20.8431	1	0	0.808891	-0.077176	0.021607
4.12709	0	0.824578	0.008182	0.1513	17.6025	1.94591	20.8471	1	0	0.757346	1.04316	0.023918
4.01818	0	0.395074	0.0298467	0.556169	0.218452	2.19722	21.9515	2	0	1.73781	2.94333	0.694729
4.01791	0	0.385882	0.0284213	0.5287	0.521686	2.19722	21.8459	1	0	1.73781	2.94333	0.62748
4.01818	0	0.404287	0.026996	0.5007	0.82492	2.19722	21.7403	3	0	1.73781	2.5297	0.560231
4.01819	0	0.339751	0.0255707	0.4727	1.12815	2.19722	21.6348	1	0	1.42822	1.88354	0.492982
4.01819	0	0.339936	0.0241453	0.4447	1.43139	2.19722	21.5292	2	0	1.11863	1.23738	0.425733
4.01792	0	0.537888	0.02272	0.4167	1.73462	2.19722	21.4236	3	0	0.809034	0.591217	0.358484
4.01432	0.0067329	0.433197	0.0212947	0.3887	2.03786	2.19722	21.318	1	0	0.499441	-0.054945	0.291235
4.04225	0.0192031	0.597036	0.0198693	0.3607	2.10359	2.19722	21.3308	1	0	0.656236	0.102438	0.298421
4.08306	0.0245316	0.672544	0.021875	0.3079	2.04167	2.19722	21.3989	1	0	0.41682	-0.059275	0.330092
3.9802	0.161586	0.494973	0.114579	0.1174	0.638759	1.60944	20.2497	1	0	0.809217	-0.814258	0.102588
3.98011	0.140292	0.414527	0.10399	0.1275	0.393136	1.60944	20.6708	2	0	0.763025	-0.814258	0.102588
3.98021	0.118997	0.401116	0.0934007	0.1376	0.147513	1.60944	21.0919	3	0	0.716833	-0.814258	0.013429
3.98021	0.0977032	0.372544	0.0828113	0.1477	0.09811	1.72609	21.5129	3	0	0.670641	-0.814258	0.103925
3.98021	0.0764089	0.419951	0.072222	0.1578	0.343733	1.84388	21.934	3	0	0.624449	-0.814258	0.221279
3.9801	0.0551147	0.631919	0.0616327	0.1679	0.589356	1.96166	22.3551	1	0	0.578257	-0.814258	0.338633
3.99183	0.0338204	0.6939	0.0510433	0.178	0.834979	2.07944	22.7762	2	0	0.532065	0.231544	0.455987
4.05745	0.0125261	0.643097	0.040454	0.1881	1.0806	2.19722	23.1973	1	0	0.485873	2.94333	0.573341
4.12974	0.0376074	0.705669	0.0462217	0.1982	1.08962	2.07944	23.4118	1	0	0.356515	2.94333	0.570106
3.94723	0.133022	0.663115	0.0635737	0.449661	3.28277	2.19722	20.3294	2	0	1.73781	2.94333	0.29468
3.87425	0.171399	0.480064	0.0401213	0.130208	3.21462	2.19722	20.3739	2	0	1.73781	-0.814258	0.289564
3.95725	0.145053	0.474212	0.016669	0.246951	3.14648	2.19722	20.4883	2	0	1.73781	-0.814258	0.284448
3.91362	0.580846	0.535937	0.0452263	0.0901168	3.07833	2.19722	20.3581	2	0	1.73781	2.94333	0.279332
3.87783	0.414709	0.593323	0.0416783	0.0325678	3.01018	2.19722	20.4049	3	0	1.56635	-0.814258	0.274216
3.87425	0.279725	0.504526	0.0381303	0.168769	2.94204	2.19722	20.4305	1	0	1.36032	2.94333	0.2691
3.91535	0.246664	0.511168	0.0345823	0.236474	2.87389	2.19722	20.5178	1	0	1.15429	-0.814258	0.263984
3.91555	0.184824	0.641275	0.0310343	0.225013	2.80575	2.19722	20.7207	3	0	0.948262	-0.814258	0.258868
3.87425	0.0921803	0.512621	0.0274863	0.2978	2.7376	2.19722	20.79	3	0	0.742234	0.162042	0.253752
3.87425	0	0.488449	0.044305	0.0562108	17.6025	2.07944	17.597	1	0	0.855842	2.94333	0.102588
3.91493	0	0.620632	0.280396	0.369823	17.6025	2.07944	17.597	3	0	0.849807	2.94333	0.102588
3.91956	0.0703934	0.657461	0.310942	0.469982	16.5687	2.07944	17.597	2	0	0.843772	2.94333	0.102588
3.87425	0.021631	0.595122	0.192763	0.12005	14.4528	2.07944	17.597	1	0	0.837737	2.94333	0.102588
3.99199	0.00783042	0.730896	0.0702803	0.020743	12.3369	2.07944	17.597	3	0	0.831702	7.4393	0.0399
3.95966	0	0.748131	0.0639597	0.128894	10.2211	2.07944	18.1566	3	0	0.825667	1.84455	0.024543
3.92861	0.0656141	0.512543	-0.04151	0.0461839	8.10516	2.07944	19.1897	2	0	0.819632	1.24979	0.088986
3.97002	0.01696	0.436355	0.347369	0.0510735	5.98927	2.07944	20.232	1	0	0.813597	0.655042	0.153429
3.93633	0.149906	0.754285	0.0221997	0.0474	3.87338	2.07944	20.3069	2	0	0.807562	0.06029	0.217872
3.88475	0.204621	0.535559	0.0168747	0.1815	1.2817	2.07944	22.499	3	1	0.605994	0.299325	0.560562
3.90525	0.203602	0.593207	0.000749	0.2412	1.16391	2.19722	22.704	2	1	0.745647	0.022397	0.627498
3.90781	0.177486	0.507028	0.00256233	0.3387	0.982771	2.19722	22.8491	2	1	0.861286	0.032996	0.665051
3.91298	0.0501272	0.66531	0.00372667	0.3384	1.09124	2.07944	22.9166	1	1	1.07345	-0.056684	0.570377
3.90088	0.18986	0.655205	0.00699633	0.3764	0.94625	2.19722	23.0139	2	1	0.973933	0.011325	0.63229
3.91044	0.123581	0.665263	0.004519	0.4356	0.809203	2.19722	23.0318	2	1	1.00242	-0.039974	0.650014
3.90877	0.115463	0.598562	0.00280433	0.4021	0.757126	2.19722	23.1069	2	1	0.968815	-0.024309	0.71132
3.92146	0.0728624	0.638736	0.004107	0.4334	0.622174	2.19722	23.0121	3	1	0.90468	-0.205134	0.758393
4.0924	0.181017	0.815033	0.00207967	0.3791	0.671012	2.19722	23.0035	1	1	0.86307	-0.039206	0.786969
